# Supplementary material for: Synthesis, Optimization, and Biological Evaluation of Corrinated Conjugates of the GLP-1R Agonist Exendin-4
Source: PubMed Central journal article supplement (PMC8279408; doi:10.1021/acs.jmedchem.1c00185), 2021-03-06
Supplement: jm1c00185_si_001.pdf [file jm1c00185_si_001.pdf]

## Supporting Information

### Design, Synthesis and Biological Evaluation of Corrinated Conjugates of the GLP-1R Agonist Exendin-4

Ian C. Tinsley<sup>1,†,□</sup>, Tito Borner<sup>5,§,□</sup>, MacKenzie L. Swanson<sup>1,†</sup>, Oleg G. Chepurny<sup>2,‡</sup>, Sarah A. Doebley<sup>5,§</sup>, Varun Kamat<sup>3,§</sup>, Ian R. Sweet<sup>3,§</sup>, George G. Holz<sup>2,‡</sup>, Matthew R. Hayes<sup>4,|,¥</sup>, Bart C. De Jonghe<sup>5,§,¥</sup>, and Robert P. Doyle<sup>1,2,†,‡,¥,\*</sup>

<sup>†</sup> Department of Chemistry, Syracuse University, 111 College Place, Syracuse, New York 13244, United States

<sup>‡</sup> Department of Medicine, State University of New York, Upstate Medical University, Syracuse, New York 13245, United States

<sup>§</sup> Department of Medicine, University of Washington, Medicine Diabetes Institute, Seattle, Washington 98109, United States

<sup>|</sup> Department of Psychiatry, University of Pennsylvania, Perelman School of Medicine, Philadelphia, PA 19104, United States

<sup>¥</sup> Department of Biobehavioral Health Sciences, University of Pennsylvania, School of Nursing, Philadelphia, Pennsylvania 19104, United States

□ contributed equally to the work

¥ senior authors

\*corresponding author: rpdoyle@syr.edu

#### Table of Contents

#### Page Number

|                                                                                                                                                             |           |
|-------------------------------------------------------------------------------------------------------------------------------------------------------------|-----------|
| <b>Figure S1.</b> RP-HPLC trace of commercial vitamin B12 at 6.8 min.                                                                                       | <b>8</b>  |
| <b>Figure S2.</b> ESI-MS of commercial vitamin B12, expected m/z = 1355, observed m/z = [M+H <sup>+</sup> ] <sup>+1</sup> 1356.                             | <b>8</b>  |
| <b>Figure S3.</b> Electronic absorption spectroscopy of commercial vitamin B12 in water.                                                                    | <b>9</b>  |
| <b>Figure S4.</b> <sup>1</sup> H NMR of commercial vitamin B12 (400 MHz, 298K, D <sub>2</sub> O).                                                           | <b>10</b> |
| <b>Figure S5.</b> <sup>1</sup> H NMR of commercial vitamin B12 (400 MHz, 298K, D <sub>2</sub> O) (Aromatic).                                                | <b>11</b> |
| <b>Figure S6.</b> <sup>13</sup> C NMR of commercial vitamin B12 (400 MHz, 298K, D <sub>2</sub> O).                                                          | <b>12</b> |
| <b>Figure S7.</b> RP-HPLC trace showing the α- and β-isomer products of <b>2</b> at 5.2 and 6.7 min.                                                        | <b>13</b> |
| <b>Figure S8.</b> ESI-MS of <b>2</b> , expected m/z = 1042, observed m/z = [M-CN] <sup>+1</sup> 1016.                                                       | <b>13</b> |
| <b>Figure S9.</b> Electronic absorption spectroscopy of <b>2</b> in water.                                                                                  | <b>14</b> |
| <b>Figure S10.</b> <sup>1</sup> H NMR of <b>2</b> (400 MHz, 298K, D <sub>2</sub> O).                                                                        | <b>15</b> |
| <b>Figure S11.</b> <sup>13</sup> C NMR of <b>2</b> (400 MHz, 298K, D <sub>2</sub> O).                                                                       | <b>16</b> |
| <b>Figure S12.</b> RP-HPLC trace showing Ex4 at 11.8 min.                                                                                                   | <b>17</b> |
| <b>Figure S13.</b> ESI-MS of Ex4, expected m/z = 4213, observed m/z = [M+3H <sup>+</sup> ] <sup>+3</sup> 1405, [M+4H <sup>+</sup> ] <sup>+4</sup> 1054 m/z. | <b>17</b> |
| <b>Figure S14.</b> <i>In vitro</i> dose escalation study of Ex4 showing increase in cAMP levels in                                                          | <b>18</b> |

|                                                                                                                                                                                                                                                                                                                                                                                                                                                           |           |
|-----------------------------------------------------------------------------------------------------------------------------------------------------------------------------------------------------------------------------------------------------------------------------------------------------------------------------------------------------------------------------------------------------------------------------------------------------------|-----------|
| GLP-1R stably transfected HEK-293-H188 c20 cells.                                                                                                                                                                                                                                                                                                                                                                                                         |           |
| <b>Figure S15.</b> RP-HPLC trace showing Ex40 at 11.0 min.                                                                                                                                                                                                                                                                                                                                                                                                | <b>18</b> |
| <b>Figure S16.</b> ESI-MS of Ex40, expected m/z = 4341, observed m/z = [M+3H <sup>+</sup> ] <sup>+3</sup> 1447,<br>[M+4H <sup>+</sup> ] <sup>+4</sup> 1086, [M+5H <sup>+</sup> ] <sup>+5</sup> 869 m/z.                                                                                                                                                                                                                                                   | <b>19</b> |
| <b>Figure S17.</b> <i>In vitro</i> dose escalation study of Ex40 showing increase in cAMP<br>levels in GLP-1R stably transfected HEK-293-H188 c20 cells.                                                                                                                                                                                                                                                                                                  | <b>19</b> |
| <b>Figure S18.</b> RP-HPLC trace showing the α- and β-isomer products of <b>4</b> at 8.8 and 9.5 min.                                                                                                                                                                                                                                                                                                                                                     | <b>20</b> |
| <b>Figure S19.</b> ESI-MS of <b>4</b> , expected m/z = 1115, observed m/z = [M <sup>+</sup> -H <sub>2</sub> O] <sup>+1</sup> 1096,<br>[M <sup>+</sup> -H <sub>2</sub> O+H <sup>+</sup> ] <sup>+2</sup> : 549 m/z.                                                                                                                                                                                                                                         | <b>20</b> |
| <b>Figure S20.</b> Electronic absorption spectroscopy of <b>4</b> in water.                                                                                                                                                                                                                                                                                                                                                                               | <b>21</b> |
| <b>Figure S21.</b> <sup>1</sup> H NMR of <b>4</b> . (400 MHz, 298K, D <sub>2</sub> O).                                                                                                                                                                                                                                                                                                                                                                    | <b>22</b> |
| <b>Figure S22.</b> <sup>1</sup> H NMR of <b>4</b> . (400 MHz, 298K, D <sub>2</sub> O) (Aromatic). Characteristic signals (H19)<br>of β- (6.50) and α- (6.42) aquo-isomers of <b>4</b> are observed. <sup>1</sup>                                                                                                                                                                                                                                          | <b>23</b> |
| <b>Figure S23.</b> RP-HPLC trace showing product <b>12</b> at 11.7 min.                                                                                                                                                                                                                                                                                                                                                                                   | <b>24</b> |
| <b>Figure S24.</b> ESI-MS of <b>12</b> , expected m/z = 5327, observed m/z = [M <sup>+</sup> -H <sub>2</sub> O+2H <sup>+</sup> ] <sup>+3</sup> 1771,<br>[M <sup>+</sup> -H <sub>2</sub> O+3H <sup>+</sup> ] <sup>+4</sup> : 1328 m/z.                                                                                                                                                                                                                     | <b>24</b> |
| <b>Figure S25.</b> <i>In vitro</i> dose escalation study of <b>12</b> showing increase in cAMP levels in<br>GLP-1R stably transfected HEK-293-H188 c20 cells.                                                                                                                                                                                                                                                                                             | <b>25</b> |
| <b>Figure S26.</b> RP-HPLC trace showing product <b>20</b> at 11.8 min.                                                                                                                                                                                                                                                                                                                                                                                   | <b>25</b> |
| <b>Figure S27.</b> ESI-MS of <b>20</b> , expected m/z = 5456, observed m/z = [M <sup>+</sup> -H <sub>2</sub> O+2H <sup>+</sup> ] <sup>+3</sup> 1813,<br>[M <sup>+</sup> -H <sub>2</sub> O+3H <sup>+</sup> ] <sup>+4</sup> 1360, [M <sup>+</sup> -H <sub>2</sub> O+4H <sup>+</sup> ] <sup>+5</sup> 1088, [M <sup>+</sup> -H <sub>2</sub> O+5H <sup>+</sup> ] <sup>+6</sup> 907, [M <sup>+</sup> -H <sub>2</sub> O+6H <sup>+</sup> ] <sup>+7</sup> 777 m/z. | <b>26</b> |
| <b>Figure S28.</b> <i>In vitro</i> dose escalation study of <b>20</b> showing increase in cAMP levels in GLP-1R<br>stably transfected HEK-293-H188 c20 cells.                                                                                                                                                                                                                                                                                             | <b>26</b> |
| <b>Figure S29.</b> RP-HPLC trace showing the α- and β-isomer products of <b>5</b> at 7.4 and 7.9 min.                                                                                                                                                                                                                                                                                                                                                     | <b>27</b> |
| <b>Figure S30.</b> ESI-MS of <b>5</b> , expected m/z = 1129, observed m/z = [M <sup>+</sup> -H <sub>2</sub> O] <sup>+1</sup> 1111,<br>[M <sup>+</sup> -H <sub>2</sub> O+H <sup>+</sup> ] <sup>+2</sup> 556 m/z.                                                                                                                                                                                                                                           | <b>27</b> |
| <b>Figure S31.</b> Electronic absorption spectroscopy of <b>5</b> in water.                                                                                                                                                                                                                                                                                                                                                                               | <b>28</b> |
| <b>Figure S32.</b> <sup>1</sup> H NMR of <b>5</b> (400 MHz, 298K, D <sub>2</sub> O).                                                                                                                                                                                                                                                                                                                                                                      | <b>29</b> |
| <b>Figure S33.</b> <sup>1</sup> H NMR of <b>5</b> (400 MHz, 298K, D <sub>2</sub> O) (Aromatic). Characteristic signals (H19) of<br>β-(6.49) and α- (6.42) aquo-isomers of <b>5</b> are observed. <sup>1</sup>                                                                                                                                                                                                                                             | <b>30</b> |
| <b>Figure S34.</b> RP-HPLC trace showing product <b>13</b> at 12.0 min.                                                                                                                                                                                                                                                                                                                                                                                   | <b>31</b> |

|                                                                                                                                                                                                                                                                 |           |
|-----------------------------------------------------------------------------------------------------------------------------------------------------------------------------------------------------------------------------------------------------------------|-----------|
| <b>Figure S35.</b> ESI-MS of <b>13</b> , expected $m/z = 5341$ , observed $m/z = [M^+-H_2O+2H^+]^{+3} 1775$ ,<br>$[M^+-H_2O+3H^++CH_3OH]^{+4} 1364$ , $[M^+-H_2O+3H^+]^{+4} 1332$ $m/z$ .                                                                       | <b>31</b> |
| <b>Figure S36.</b> <i>In vitro</i> dose escalation study of <b>13</b> showing increase in cAMP levels in GLP-1R<br>stably transfected HEK-293-H188 c20 cells.                                                                                                   | <b>32</b> |
| <b>Figure S37.</b> RP-HPLC trace showing product <b>21</b> at 11.8 min.                                                                                                                                                                                         | <b>32</b> |
| <b>Figure S38.</b> ESI-MS of <b>21</b> , expected $m/z = 5469$ , observed $m/z = [M^+-H_2O+2H^++CH_3CN]^{+3} 1859$ ,<br>$[M^+-H_2O+2H^+]^{+3} 1819$ , $[M^+-H_2O+3H^++CH_3OH]^{+4} 1395$ , $[M^+-H_2O+3H^+]^{+4} 1364$ ,<br>$[M^+-H_2O+4H^+]^{+5} 1091$ $m/z$ . | <b>33</b> |
| <b>Figure S39.</b> <i>In vitro</i> dose escalation study of <b>21</b> showing increase in cAMP levels in GLP-1R<br>stably transfected HEK-293-H188 c20 cells.                                                                                                   | <b>33</b> |
| <b>Figure S40.</b> RP-HPLC trace showing the $\alpha$ - and $\beta$ -isomer products of <b>6</b> at 10.4 and 11.0 min.                                                                                                                                          | <b>34</b> |
| <b>Figure S41.</b> ESI-MS of <b>6</b> , expected $m/z = 1143$ , observed $m/z = [M^+-H_2O]^{+1} 1124$ ,<br>$[M^+-H_2O+H^+]^{+2} 563$ $m/z$ .                                                                                                                    | <b>34</b> |
| <b>Figure S42.</b> Electronic absorption spectra of <b>6</b> in water.                                                                                                                                                                                          | <b>35</b> |
| <b>Figure S43.</b> $^1H$ NMR of <b>6</b> (400 MHz, 298K, $D_2O$ ).                                                                                                                                                                                              | <b>36</b> |
| <b>Figure S44.</b> $^1H$ NMR of <b>6</b> (400 MHz, 298K, $D_2O$ ) (Aromatic). Characteristic signals (H19) of<br>$\beta$ - (6.50) and $\alpha$ - (6.43) aquo-isomers of <b>6</b> are observed. <sup>1</sup>                                                     | <b>37</b> |
| <b>Figure S45.</b> RP-HPLC trace showing product <b>14</b> at 12.0 min.                                                                                                                                                                                         | <b>38</b> |
| <b>Figure S46.</b> ESI-MS of <b>14</b> , expected $m/z = 5355$ , observed $m/z = [M^+-H_2O+2H^+]^{+3} 1780$ ,<br>$[M^+-H_2O+3H^+]^{+4} 1335$ $m/z$ .                                                                                                            | <b>38</b> |
| <b>Figure S47.</b> <i>In vitro</i> dose escalation study of <b>14</b> showing increase in cAMP levels in GLP-1R<br>stably transfected HEK-293-H188 c20 cells.                                                                                                   | <b>39</b> |
| <b>Figure S48.</b> RP-HPLC trace showing product <b>22</b> at 11.8 min.                                                                                                                                                                                         | <b>39</b> |
| <b>Figure S49.</b> ESI-MS of <b>22</b> , expected $m/z = 5483$ , observed $m/z = [M^+-H_2O+2H^+]^{+3} 1822$ ,<br>$[M^+-H_2O+3H^+]^{+4} 1367$ , $[M^+-H_2O+5H^+]^{+6} 912$ , $[M^+-H_2O+6H^+]^{+7} 781$ $m/z$ .                                                  | <b>40</b> |
| <b>Figure S50.</b> <i>In vitro</i> dose escalation study of <b>22</b> showing increase in cAMP levels in GLP-1R<br>stably transfected HEK-293-H188 c20 cells.                                                                                                   | <b>40</b> |
| <b>Figure S51.</b> RP-HPLC trace showing the $\alpha$ - and $\beta$ -isomer products of <b>7</b> 11.3 and 11.8 min.                                                                                                                                             | <b>41</b> |
| <b>Figure S52.</b> ESI-MS of <b>7</b> , expected $m/z = 1157$ , observed $m/z = [M^+-H_2O]^{+1} 1139$ ,<br>$[M^+-H_2O+H^+]^{+2} 570$ $m/z$ .                                                                                                                    | <b>41</b> |
| <b>Figure S53.</b> Electronic absorption spectra of <b>7</b> in water.                                                                                                                                                                                          | <b>42</b> |

|                                                                                                                                                                                                                                                                                                                                                                                      |           |
|--------------------------------------------------------------------------------------------------------------------------------------------------------------------------------------------------------------------------------------------------------------------------------------------------------------------------------------------------------------------------------------|-----------|
| <b>Figure S54:</b> $^1\text{H}$ NMR of <b>7</b> (400 MHz, 298K, $\text{D}_2\text{O}$ ).                                                                                                                                                                                                                                                                                              | <b>43</b> |
| <b>Figure S55.</b> $^1\text{H}$ NMR of <b>7</b> (400 MHz, 298K, $\text{D}_2\text{O}$ ) (Aromatic). Characteristic signals (H19) of $\beta$ - (6.49) and $\alpha$ - (6.42) aquo-isomers of <b>7</b> are observed. <sup>1</sup>                                                                                                                                                        | <b>44</b> |
| <b>Figure S56.</b> RP-HPLC trace showing product <b>15</b> at 12.0 min.                                                                                                                                                                                                                                                                                                              | <b>45</b> |
| <b>Figure S57.</b> ESI-MS of <b>15</b> , expected $m/z = 5369$ , observed $m/z = [\text{M}^+-\text{H}_2\text{O}+2\text{H}^+]^{+3} 1784$ , $[\text{M}^+-\text{H}_2\text{O}+3\text{H}^+]^{+4} 1339$ $m/z$ .                                                                                                                                                                            | <b>45</b> |
| <b>Figure S58.</b> <i>In vitro</i> dose escalation study of <b>15</b> showing increase in cAMP levels in GLP-1R stably transfected HEK-293-H188 c20 cells.                                                                                                                                                                                                                           | <b>46</b> |
| <b>Figure S59.</b> RP-HPLC trace showing product <b>23</b> at 11.8 min.                                                                                                                                                                                                                                                                                                              | <b>46</b> |
| <b>Figure S60.</b> ESI-MS of <b>23</b> , expected $m/z = 5497$ , observed $m/z = [\text{M}^+-\text{H}_2\text{O}+2\text{H}^+]^{+3} 1827$ , $[\text{M}^+-\text{H}_2\text{O}+3\text{H}^+]^{+4} 1371$ , $[\text{M}^+-\text{H}_2\text{O}+5\text{H}^+]^{+6} 914$ , $[\text{M}^+-\text{H}_2\text{O}+6\text{H}^+]^{+7} 784$ , $[\text{M}^+-\text{H}_2\text{O}+7\text{H}^+]^{+8} 685$ $m/z$ . | <b>47</b> |
| <b>Figure S61.</b> <i>In vitro</i> dose escalation study of <b>23</b> showing increase in cAMP levels in GLP-1R stably transfected HEK-293-H188 c20 cells.                                                                                                                                                                                                                           | <b>47</b> |
| <b>Figure S62.</b> RP-HPLC trace showing the $\alpha$ - and $\beta$ -isomer products of <b>8</b> at 18.4 and 19.3 min.                                                                                                                                                                                                                                                               | <b>48</b> |
| <b>Figure S63.</b> ESI-MS of <b>8</b> , expected $m/z = 1204$ , observed $m/z = [\text{M}^+-\text{H}_2\text{O}]^{+1} 1185$ , $[\text{M}^+-\text{H}_2\text{O}+\text{H}^+]^{+2} 593$ $m/z$ .                                                                                                                                                                                           | <b>48</b> |
| <b>Figure S64.</b> Electronic absorption spectra of <b>8</b> in water.                                                                                                                                                                                                                                                                                                               | <b>49</b> |
| <b>Figure S65.</b> $^1\text{H}$ NMR of <b>8</b> (400 MHz, 298K, $\text{D}_2\text{O}$ ).                                                                                                                                                                                                                                                                                              | <b>50</b> |
| <b>Figure S66.</b> $^1\text{H}$ NMR of <b>8</b> (400 MHz, 298K, $\text{D}_2\text{O}$ ) (Aromatic). Characteristic signals (H19) of $\beta$ - (6.5003) and $\alpha$ - (6.4301) aquo-isomers of <b>8</b> are observed. <sup>1</sup>                                                                                                                                                    | <b>51</b> |
| <b>Figure S67.</b> RP-HPLC trace showing product <b>16</b> at 11.7 min.                                                                                                                                                                                                                                                                                                              | <b>52</b> |
| <b>Figure S68.</b> ESI-MS of <b>16</b> , expected $m/z = 5416$ , observed $m/z = [\text{M}^+-\text{H}_2\text{O}+2\text{H}^+]^{+3} 1800$ , $[\text{M}^+-\text{H}_2\text{O}+3\text{H}^+]^{+4} 1350$ $m/z$ .                                                                                                                                                                            | <b>52</b> |
| <b>Figure S69.</b> <i>In vitro</i> dose escalation study of <b>16</b> showing increase in cAMP levels in GLP-1R stably transfected HEK-293-H188 c20 cells.                                                                                                                                                                                                                           | <b>53</b> |
| <b>Figure S70.</b> RP-HPLC trace showing product <b>24</b> at 11.6 min.                                                                                                                                                                                                                                                                                                              | <b>53</b> |
| <b>Figure S71.</b> ESI-MS of <b>24</b> , expected $m/z = 5544$ , observed $m/z = [\text{M}^+-\text{H}_2\text{O}+2\text{H}^++\text{CH}_3\text{CN}]^{+3} 1884$ , $[\text{M}^+-\text{H}_2\text{O}+3\text{H}^++\text{CH}_3\text{OH}]^{+4} 1414$ , $[\text{M}^+-\text{H}_2\text{O}+3\text{H}^+]^{+4} 1382$ $m/z$ .                                                                        | <b>54</b> |
| <b>Figure S72.</b> <i>In vitro</i> dose escalation study of <b>24</b> showing increase in cAMP levels in GLP-1R stably transfected HEK-293-H188 c20 cells.                                                                                                                                                                                                                           | <b>54</b> |
| <b>Figure S73.</b> RP-HPLC trace showing the $\alpha$ - and $\beta$ -isomer products of <b>9</b> at 20.0 and 21.8 min.                                                                                                                                                                                                                                                               | <b>55</b> |

|                                                                                                                                                                                                                                                                                                                                          |           |
|------------------------------------------------------------------------------------------------------------------------------------------------------------------------------------------------------------------------------------------------------------------------------------------------------------------------------------------|-----------|
| <b>Figure S74.</b> ESI-MS of <b>9</b> , expected $m/z = 1292$ , observed $m/z = [M^+-H_2O]^{+1} 1273$ ,<br>[ $M^+-H_2O+H^+$ ] <sup>+2</sup> 637 $m/z$ .                                                                                                                                                                                  | <b>55</b> |
| <b>Figure S75.</b> Electronic absorption spectra of <b>9</b> in water.                                                                                                                                                                                                                                                                   | <b>56</b> |
| <b>Figure S76.</b> <sup>1</sup> H NMR of <b>9</b> (400 MHz, 298K, D <sub>2</sub> O).                                                                                                                                                                                                                                                     | <b>57</b> |
| <b>Figure S77.</b> <sup>1</sup> H NMR of <b>9</b> (400 MHz, 298K, D <sub>2</sub> O) (Aromatic). Characteristic signals (H19) of<br>$\beta$ - (6.50) and $\alpha$ - (6.43) aquo-isomers of <b>9</b> are observed. <sup>1</sup>                                                                                                            | <b>58</b> |
| <b>Figure S78.</b> RP-HPLC trace showing product <b>17</b> at 12.3 min.                                                                                                                                                                                                                                                                  | <b>59</b> |
| <b>Figure S79.</b> ESI-MS of <b>17</b> , expected $m/z = 5504$ , observed $m/z =$<br>[ $M^+-H_2O+2H^++CH_3CN$ ] <sup>+3</sup> 1870, [ $M^+-H_2O+3H^++CH_3OH$ ] <sup>+4</sup> 1404, [ $M^+-H_2O+4H^+$ ] <sup>+5</sup> 1098 $m/z$ .                                                                                                        | <b>59</b> |
| <b>Figure S80.</b> <i>In vitro</i> dose escalation study of <b>17</b> showing increase in cAMP levels in GLP-1R<br>stably transfected HEK-293-H188 c20 cells.                                                                                                                                                                            | <b>60</b> |
| <b>Figure S81.</b> RP-HPLC trace showing product <b>25</b> at 12.0 min.                                                                                                                                                                                                                                                                  | <b>60</b> |
| <b>Figure S82.</b> ESI-MS of <b>25</b> , expected $m/z = 5632$ , observed $m/z =$<br>[ $M^+-H_2O+2H^++CH_3CN$ ] <sup>+3</sup> 1914, [ $M^+-H_2O+3H^++CH_3OH$ ] <sup>+4</sup> 1436 $m/z$ .                                                                                                                                                | <b>61</b> |
| <b>Figure S83.</b> <i>In vitro</i> dose escalation study of <b>25</b> showing increase in cAMP levels in GLP-1R<br>stably transfected HEK-293-H188 c20 cells.                                                                                                                                                                            | <b>61</b> |
| <b>Figure S84.</b> RP-HPLC trace showing the $\alpha$ - and $\beta$ - isomer products of <b>10</b> at 12.4 and 12.8 min.                                                                                                                                                                                                                 | <b>62</b> |
| <b>Figure S85.</b> ESI-MS of <b>10</b> , expected $m/z = 1191$ , observed $m/z = [M^+-H_2O]^{+1} 1173$ .                                                                                                                                                                                                                                 | <b>62</b> |
| <b>Figure S86.</b> Electronic absorption spectra of <b>10</b> in water.                                                                                                                                                                                                                                                                  | <b>63</b> |
| <b>Figure S87.</b> <sup>1</sup> H NMR of <b>10</b> (400 MHz, 298K, D <sub>2</sub> O).                                                                                                                                                                                                                                                    | <b>64</b> |
| <b>Figure S88.</b> <sup>1</sup> H NMR of <b>10</b> (400 MHz, 298K, D <sub>2</sub> O) (Aromatic). Characteristic Signals (H19) of<br>$\beta$ - (6.49) and $\alpha$ - (6.43) aquo-isomers of <b>10</b> are Identified. <sup>1</sup> Additional peak groupings<br>between 7.56-7.51 and 7.35-7.28 are indicative of the phenyl ring linker. | <b>65</b> |
| <b>Figure S89.</b> RP-HPLC trace showing product <b>18</b> at 12.2 min.                                                                                                                                                                                                                                                                  | <b>66</b> |
| <b>Figure S90.</b> ESI-MS of <b>18</b> , expected $m/z = 5403$ , observed $m/z = [M^+-H_2O+2H^+]^{+3} 1796$ ,<br>[ $M^+-H_2O+CH_3OH+3H^+$ ] <sup>+4</sup> 1379, [ $M^+-H_2O+3H^+$ ] <sup>+4</sup> 1347 $m/z$ .                                                                                                                           | <b>66</b> |
| <b>Figure S91.</b> <i>In vitro</i> dose escalation study of <b>18</b> showing increase in cAMP levels in GLP-1R<br>stably transfected HEK-293-H188 c20 cells.                                                                                                                                                                            | <b>67</b> |
| <b>Figure S92.</b> RP-HPLC trace showing product <b>26</b> at 11.9 min.                                                                                                                                                                                                                                                                  | <b>67</b> |
| <b>Figure S93.</b> ESI-MS of <b>26</b> , expected $m/z = 5531$ , observed $m/z =$<br>[ $M^+-H_2O+CH_3OH+3H^+$ ] <sup>+4</sup> 1411, [ $M^+-H_2O+3H^+$ ] <sup>+4</sup> 1379, , [ $M^+-H_2O+4H^+-CN$ ] <sup>+4</sup> 1353,                                                                                                                 | <b>68</b> |

$[M^+-H_2O+4H^+]^{+5}$  1104 m/z.

- Figure S94.** *In vitro* dose escalation study of **26** showing increase in cAMP levels in GLP-1R stably transfected HEK-293-H188 c20 cells. **68**
- Figure S95.** RP-HPLC trace showing the  $\alpha$ - and  $\beta$ - isomer products of **11** at 12.6 and 13.0 min. **69**
- Figure S96.** ESI-MS of **11**, expected m/z = 1191, observed m/z =  $[M^+-H_2O]^{+1}$  1172,  $[M^+-H_2O+H^+]^{+2}$  587 m/z. **69**
- Figure S97.** Electronic absorption spectra of **11** in water. **70**
- Figure S98.**  $^1H$  NMR of **11**. (400 MHz, 298K,  $D_2O$ ). **71**
- Figure S99.**  $^1H$  NMR of **11**. (400 MHz, 298K,  $D_2O$ ) (Aromatic). Characteristic signals (H19) of  $\beta$ - (6.49) and  $\alpha$ - (6.42) aquo-isomers of **11** are observed.<sup>1</sup> Additional peak groupings between 7.48-7.37 are indicative of the phenyl ring linker. **72**
- Figure S100.** RP-HPLC trace showing product **19** at 12.6 min. **73**
- Figure S101.** ESI-MS of **19**, expected m/z = 5403, observed m/z =  $[M^+-H_2O+2H^+]^{+3}$  1796,  $[M^+-H_2O+CH_3OH+3H^+]^{+4}$  1379,  $[M^+-H_2O+3H^+]^{+4}$  1347 m/z. **73**
- Figure S102.** *In vitro* dose escalation study of **19** showing increase in cAMP levels in GLP-1R stably transfected HEK-293-H188 c20 cells. **74**
- Figure S103.** RP-HPLC trace showing product **27** at 11.9 min. **74**
- Figure S104.** ESI-MS of **27**, expected m/z = 5531, observed m/z =  $[M^+-H_2O+CH_3CN+2H^+]^{+3}$  1880,  $[M^+-H_2O+2H^+]^{+3}$  1838,  $[M^+-H_2O+CH_3OH+3H^+]^{+4}$  1410,  $[M^+-H_2O+3H^+]^{+4}$  1379,  $[M^+-H_2O+4H^+]^{+5}$  1103,  $[M^+-H_2O+5H^+]^{+6}$  919 m/z. **75**
- Figure S105.** *In vitro* dose escalation study of **27** showing increase in cAMP levels in GLP-1R stably transfected HEK-293-H188 c20 cells. **75**
- Figure 106.** *In vitro* dose escalation study of Ex40 showing increase in cAMP levels in rGLP-1R transiently transfected HEK-293-H188 c24 cells. **76**
- Figure 107.** Non-linear regression dose response analysis with hill slope of Ex40. **77**
- Figure 108.** *In vitro* dose escalation study of **22** showing increase in cAMP levels in rGLP-1R transiently transfected HEK-293-H188 c24 cells. **78**
- Figure 109.** Non-linear regression dose response analysis with hill slope of **22**. **79**
- Figure 110.** *In vitro* dose escalation competition binding studies of **12-27** compared with Ex4 and Ex40 controls against fluorescent GLP-1red. **79**



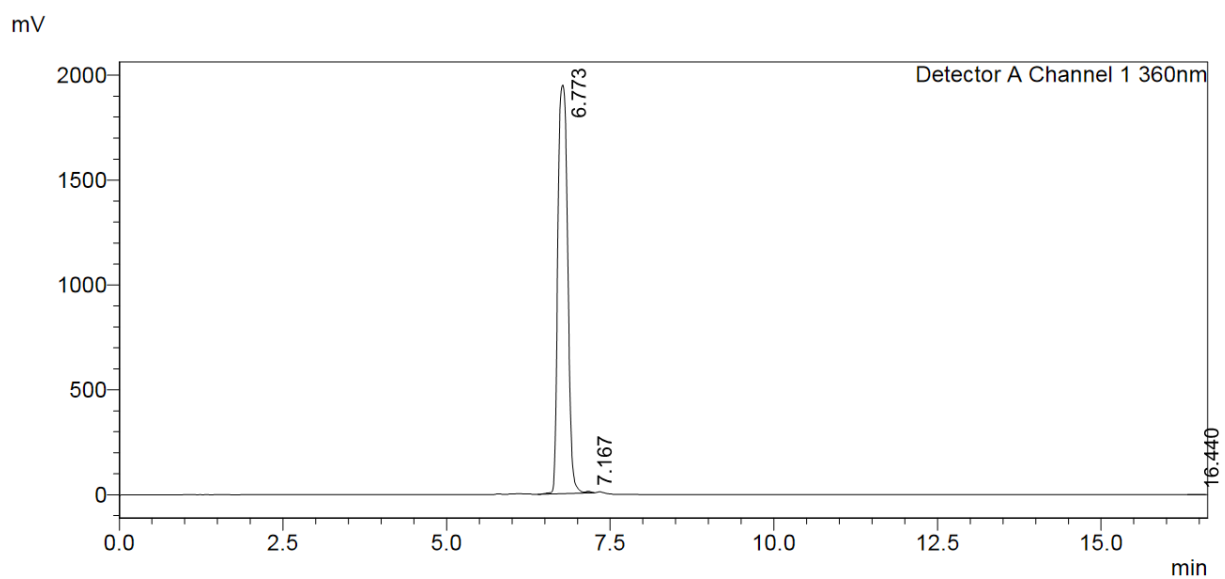

**Figure S1.** RP-HPLC trace of commercial vitamin B12 at 6.8 min.

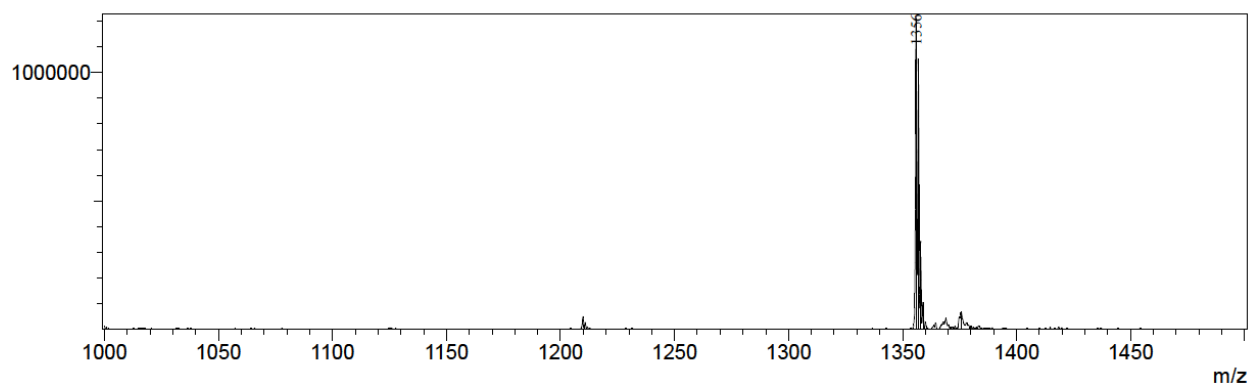

**Figure S2.** ESI-MS of commercial vitamin B12, expected  $m/z = 1355$ , observed  $m/z = [M^+ + H^+]^{+1} 1356$ .



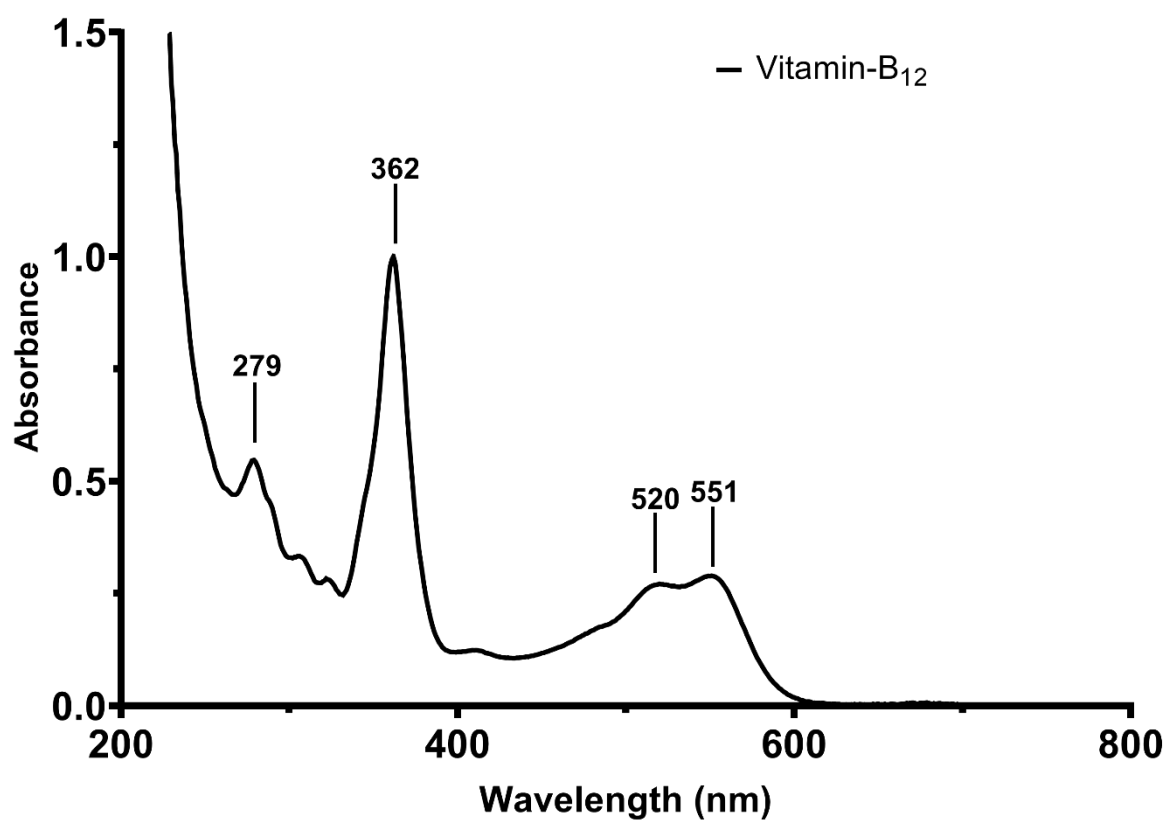

Figure S3. Electronic absorption spectroscopy of commercial vitamin B12 in water used herein.

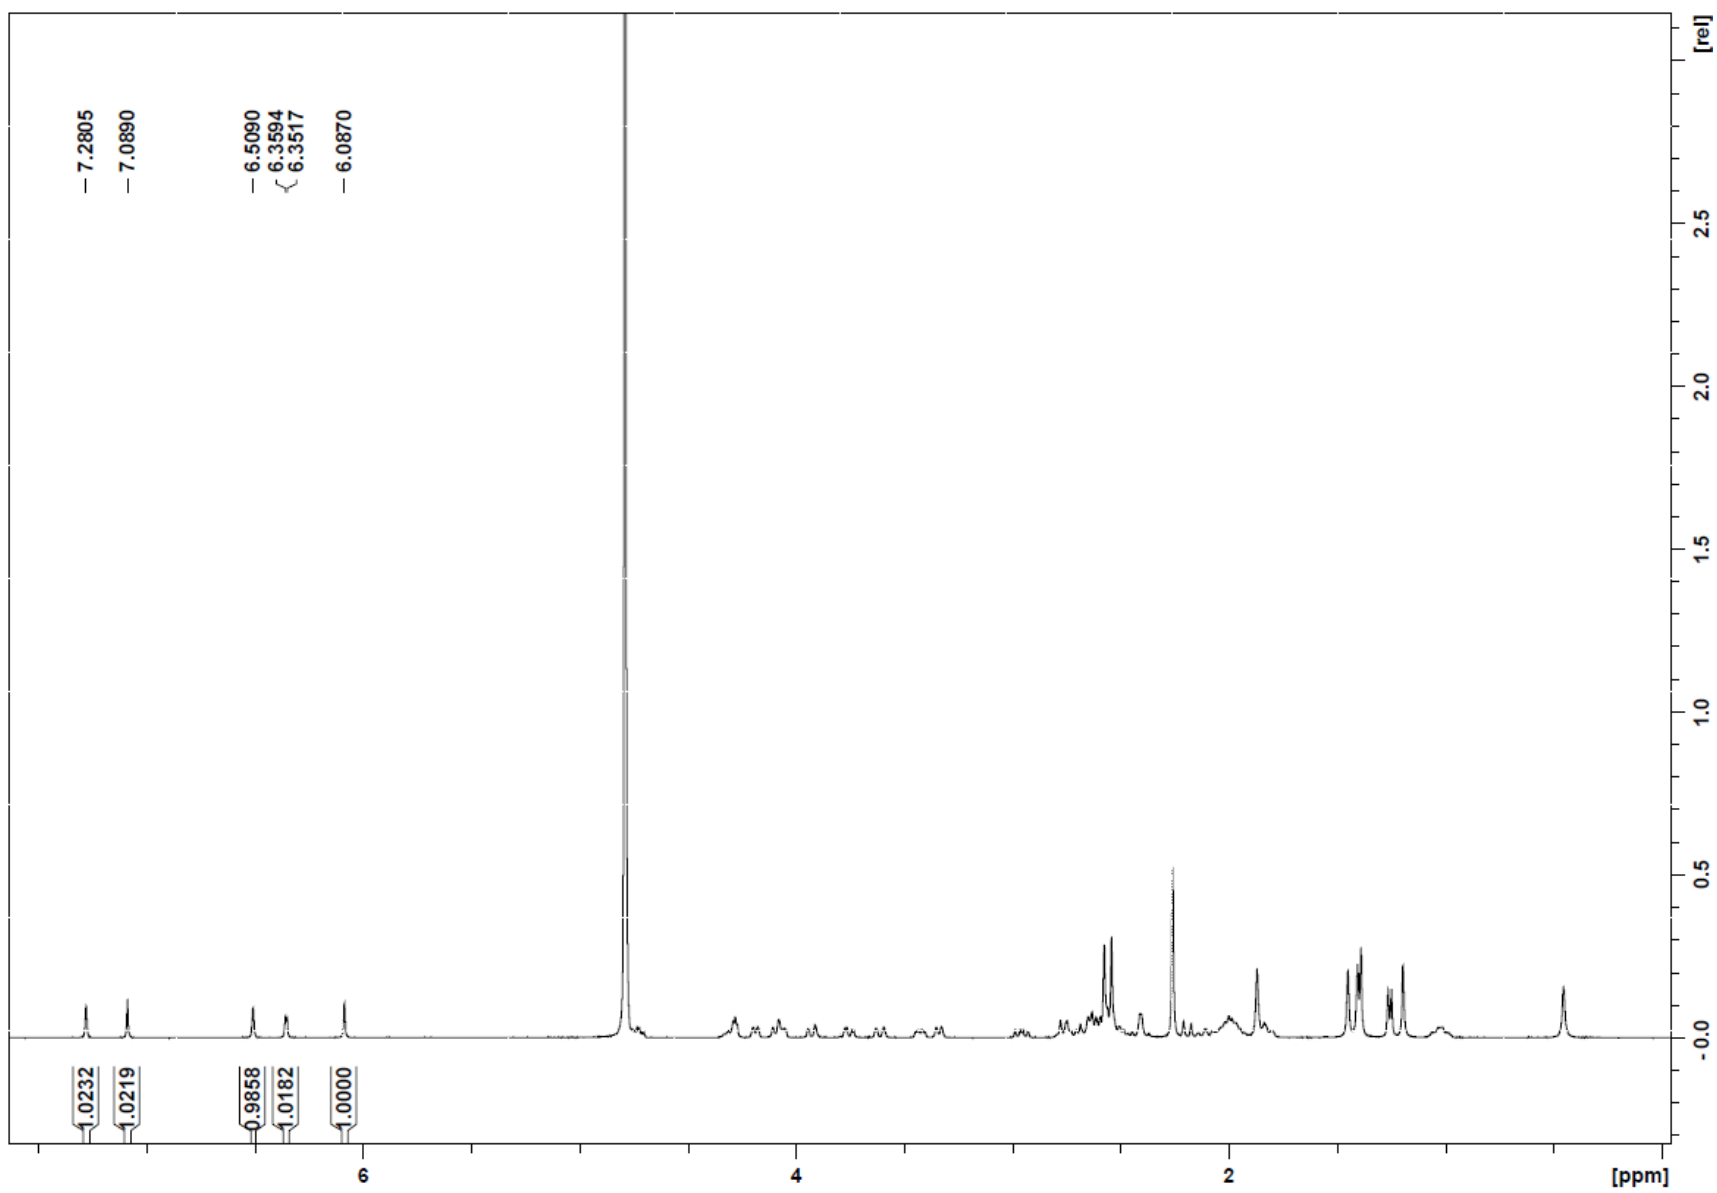

Figure S4.  $^1\text{H}$  NMR of commercial vitamin B12 (400 MHz, 298K,  $\text{D}_2\text{O}$ ) used herein.

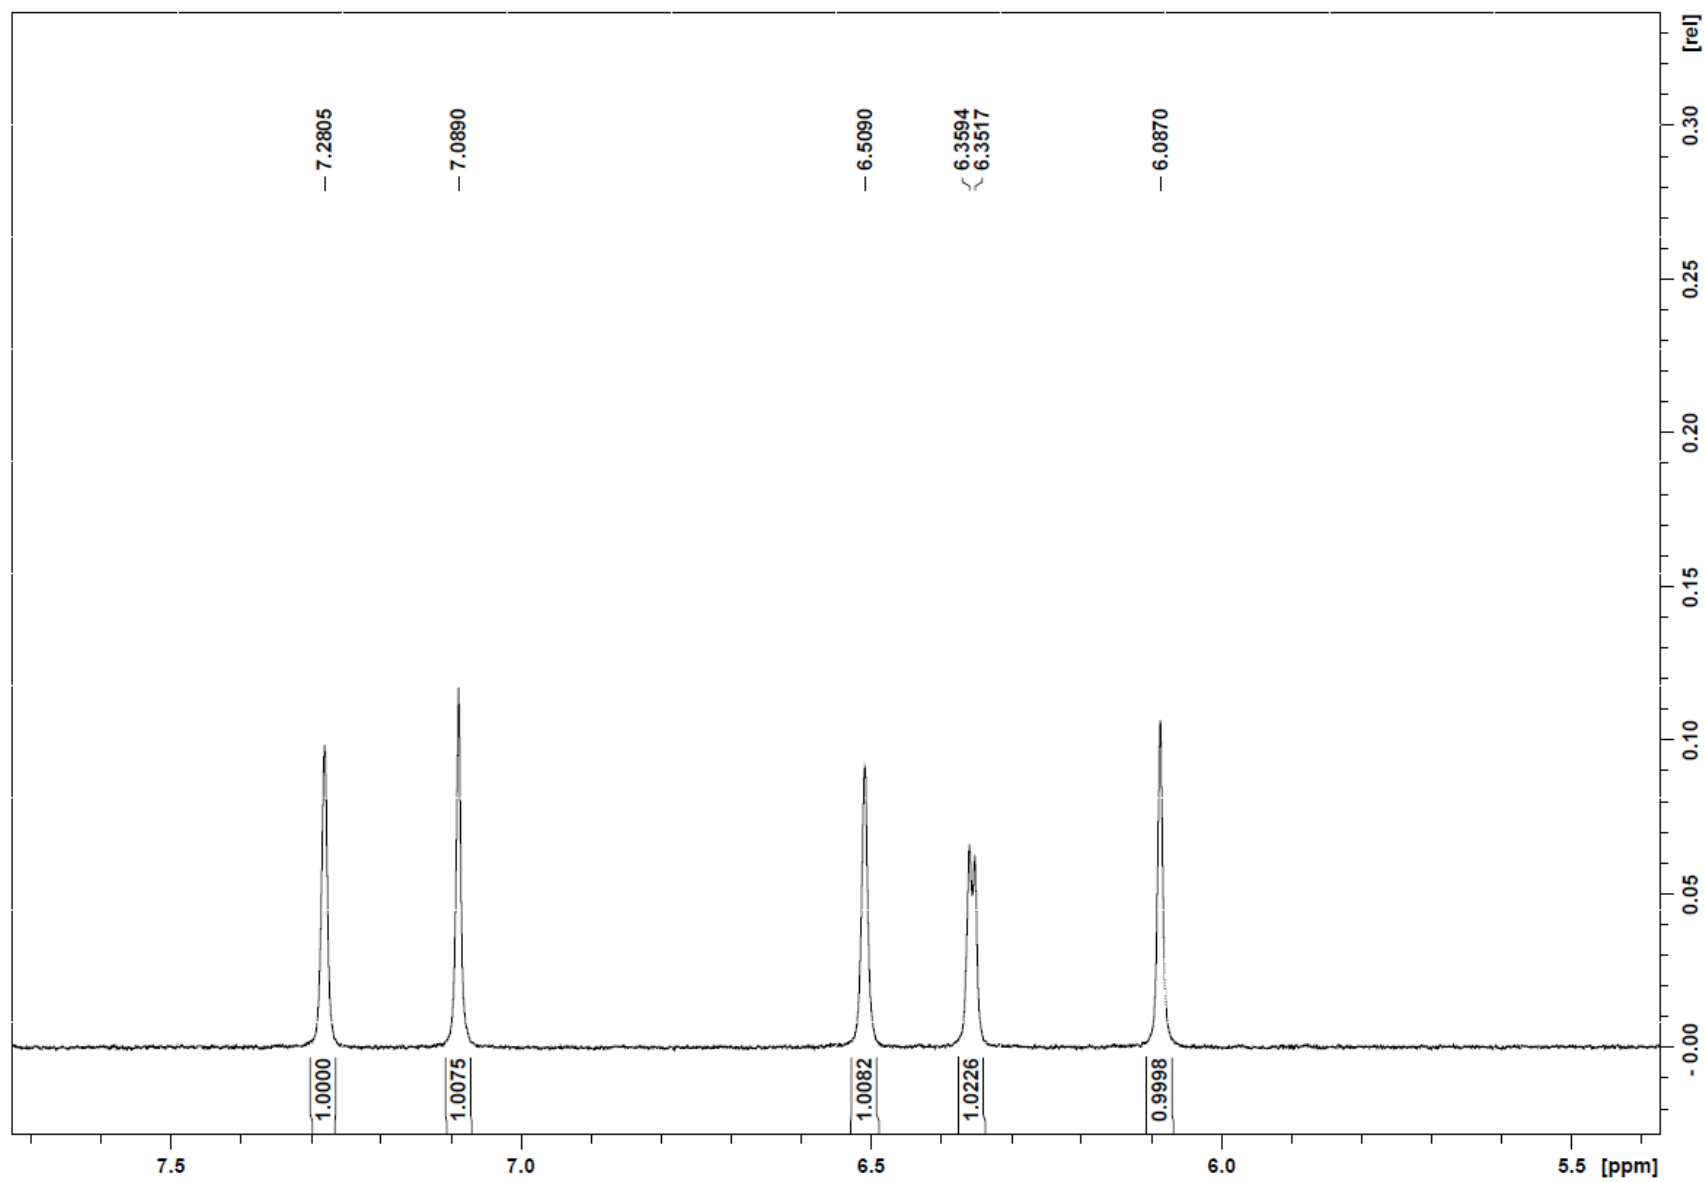

**Figure S5.** <sup>1</sup>H NMR of commercial vitamin B12 (400 MHz, 298K, D<sub>2</sub>O) (Aromatic region enlarged).

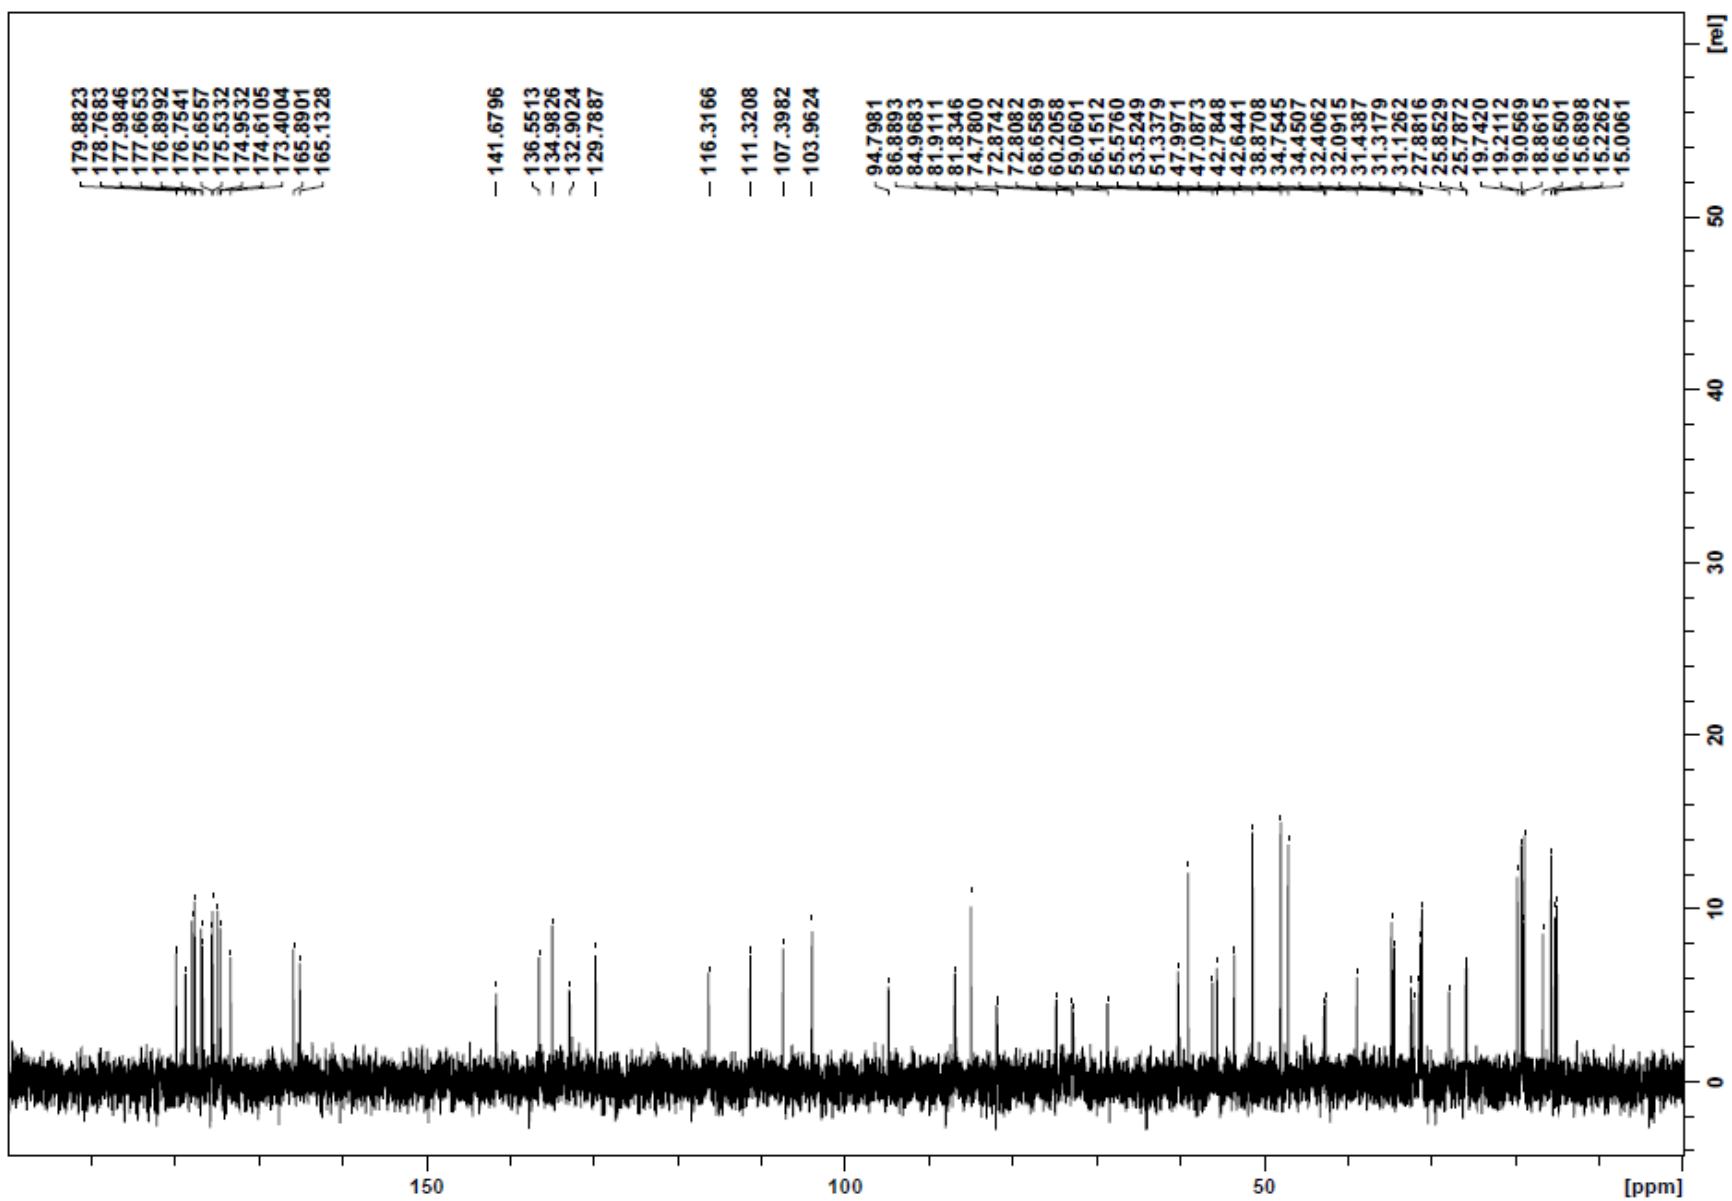

Figure S6. <sup>13</sup>C NMR of commercial vitamin B12 (400 MHz, 298K, D<sub>2</sub>O).

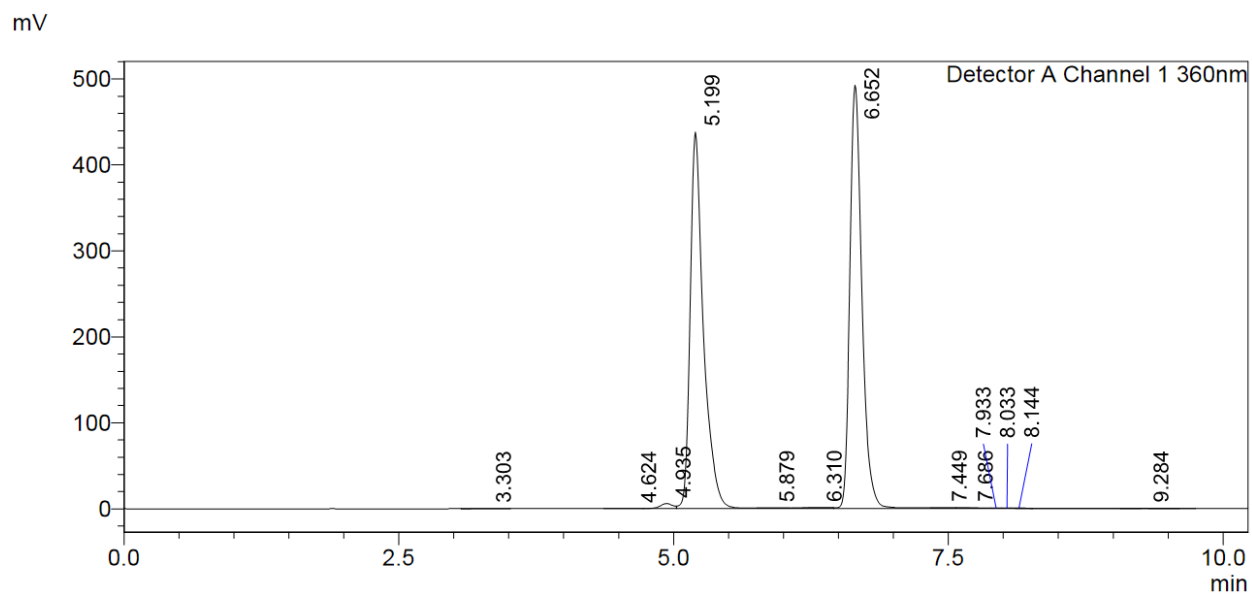

**Figure S7.** RP-HPLC trace showing the  $\alpha$ - and  $\beta$ -isomer products of **2** at 5.2 and 6.7 min.

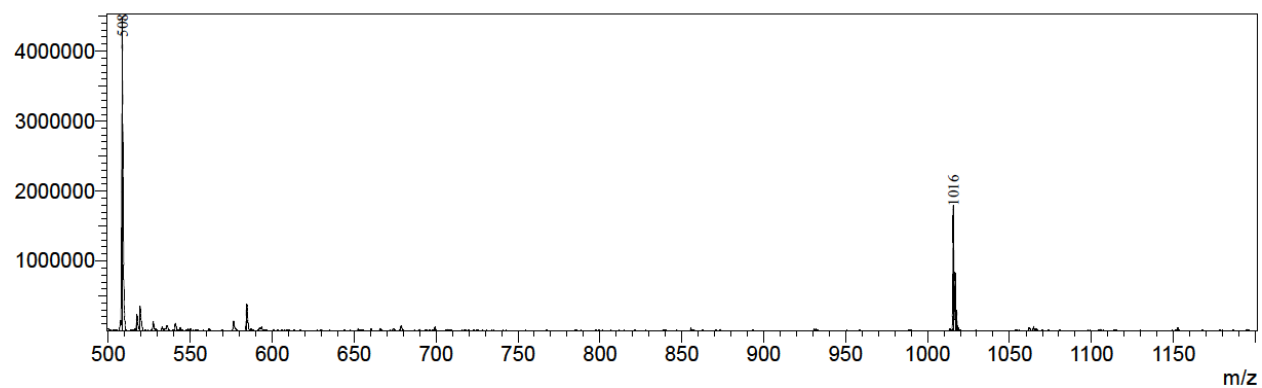

**Figure S8.** ESI-MS of **2**, expected  $m/z = 1042$ , observed  $m/z = [M-CN]^+ 1016$ .

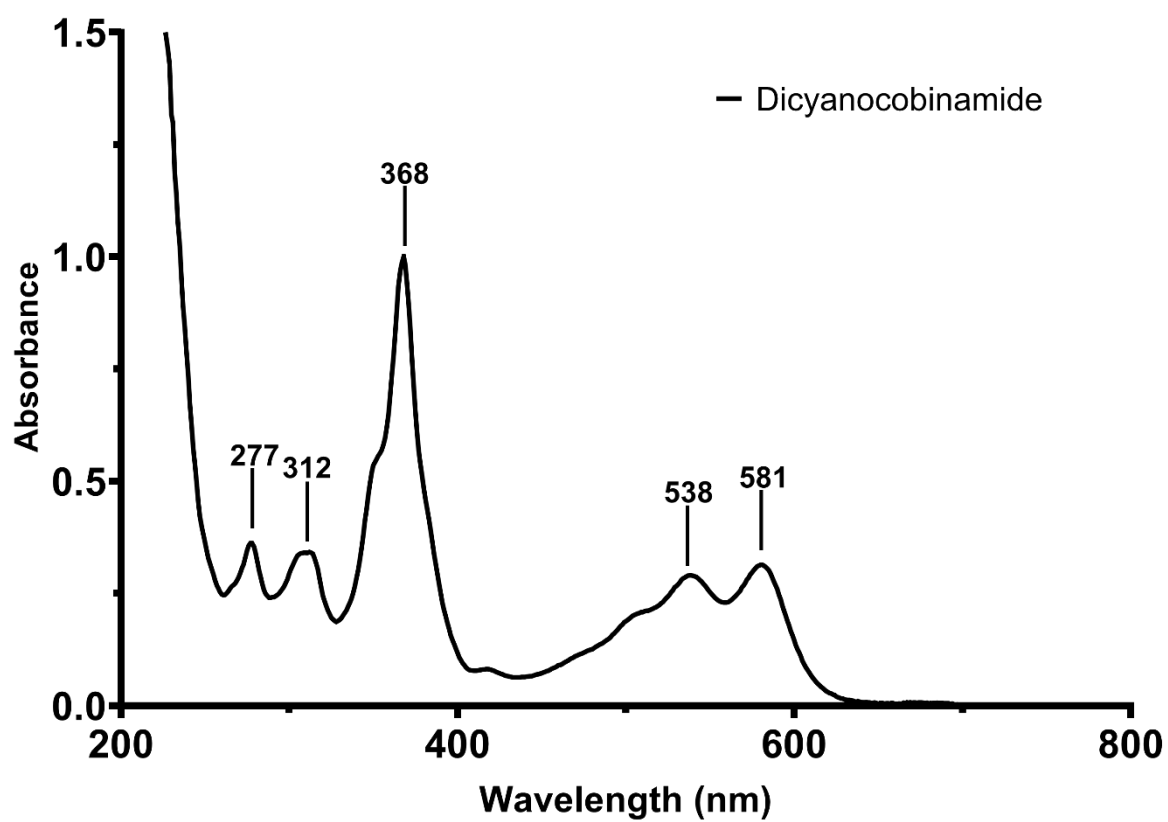

Figure S9. Electronic absorption spectroscopy of **2** in water.

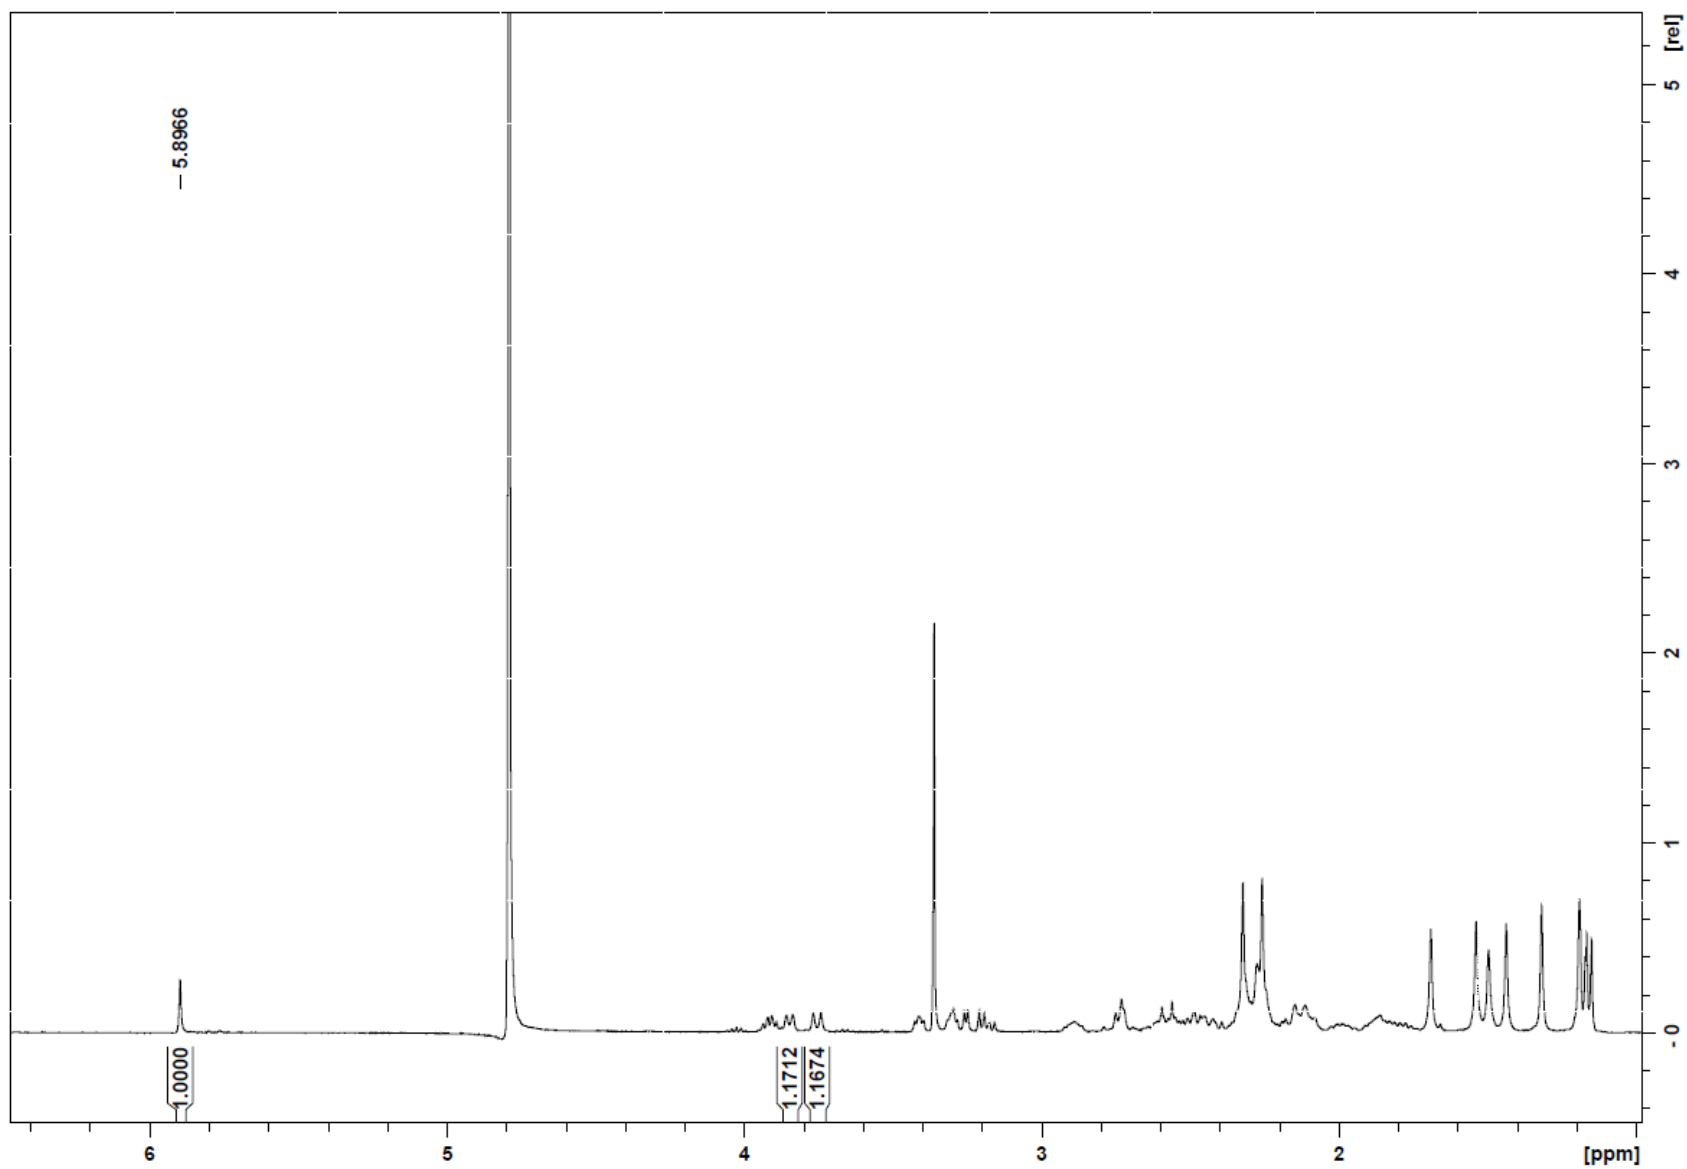

Figure S10.  $^1\text{H}$  NMR of **2** (400 MHz, 298K,  $\text{D}_2\text{O}$ ).

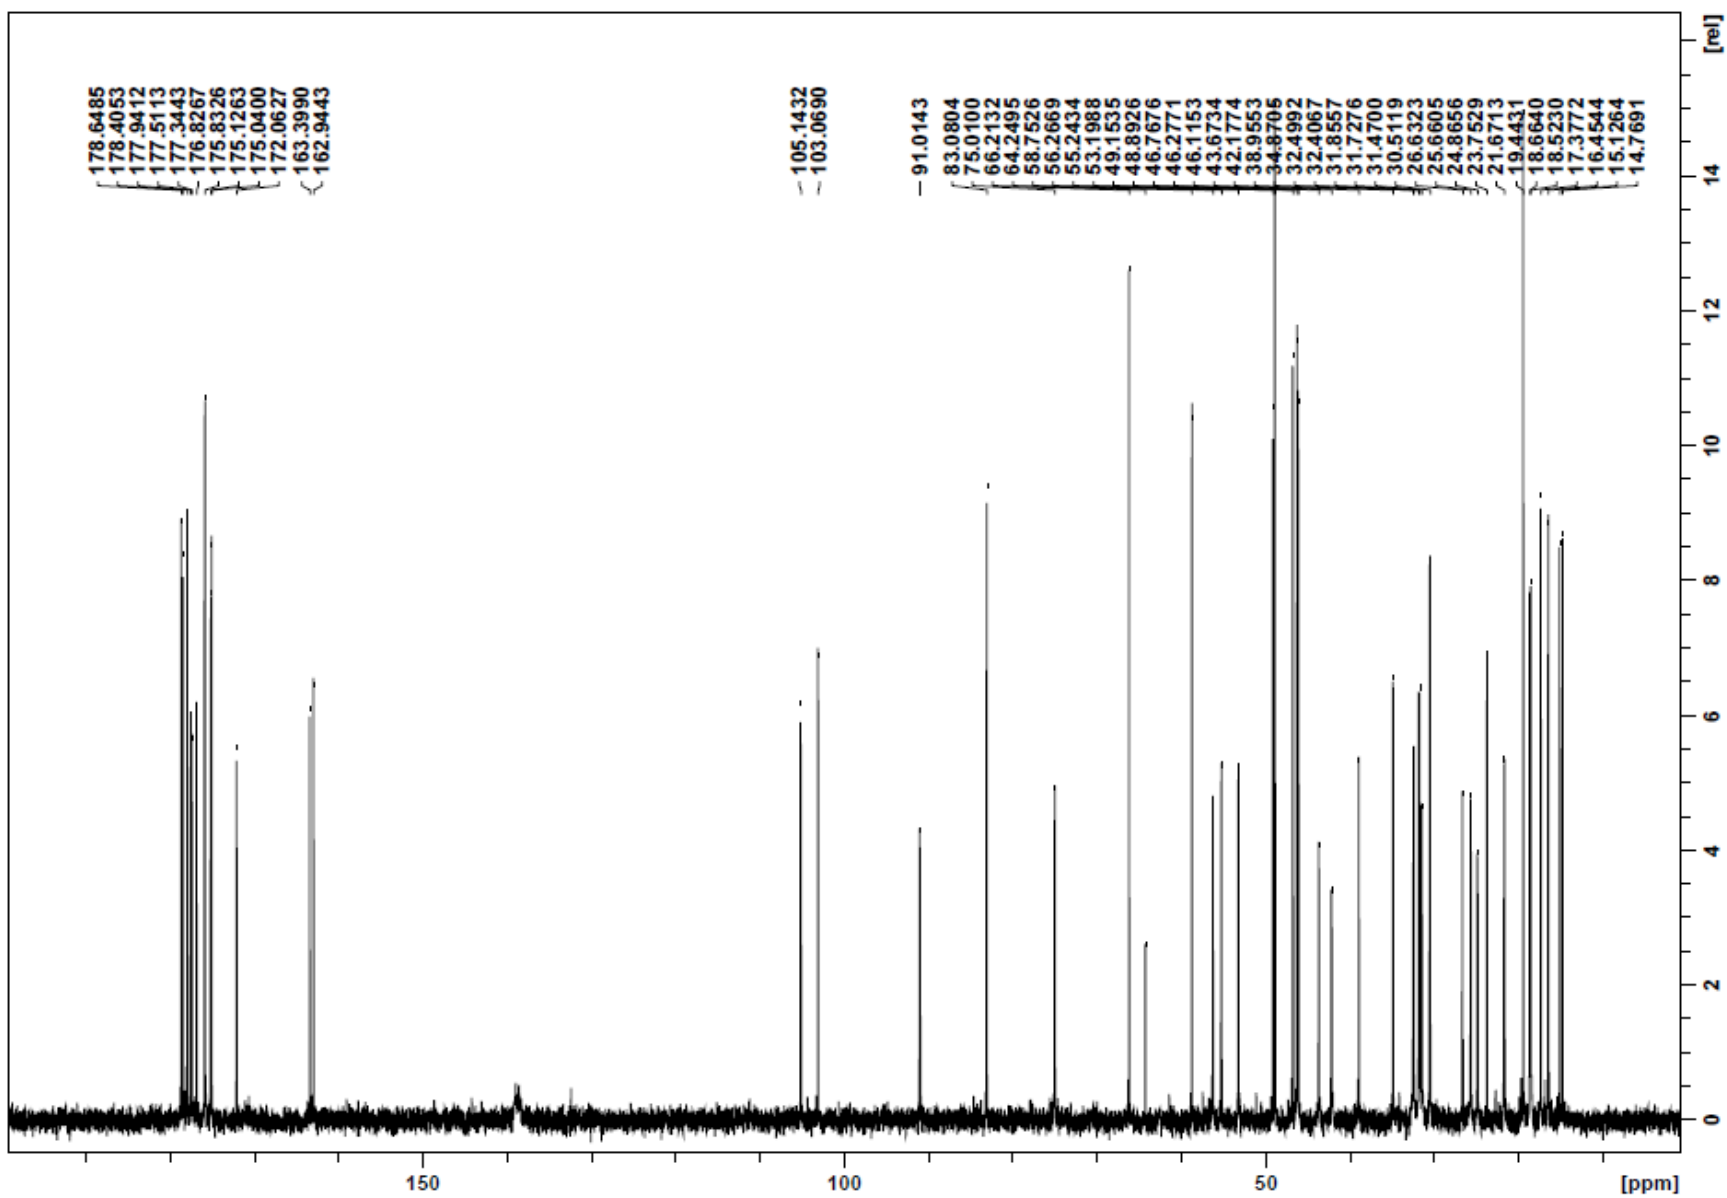

Figure S11.  $^{13}\text{C}$  NMR of **2** (400 MHz, 298K,  $\text{D}_2\text{O}$ ).



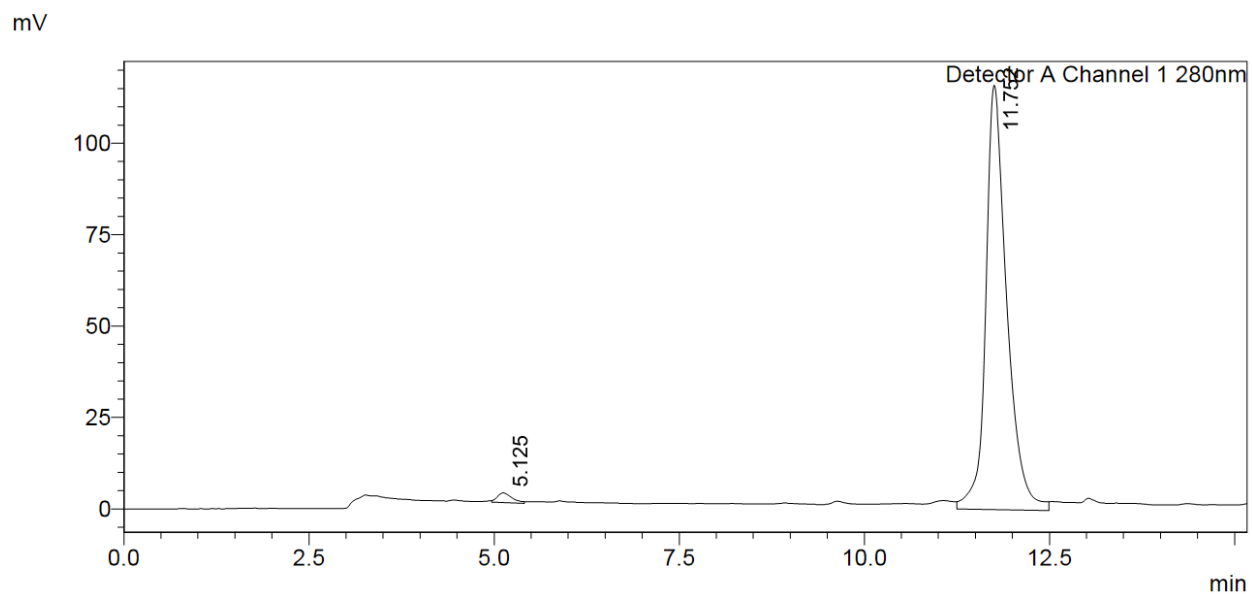

**Figure S12.** RP-HPLC trace showing Ex4 at 11.8 min.

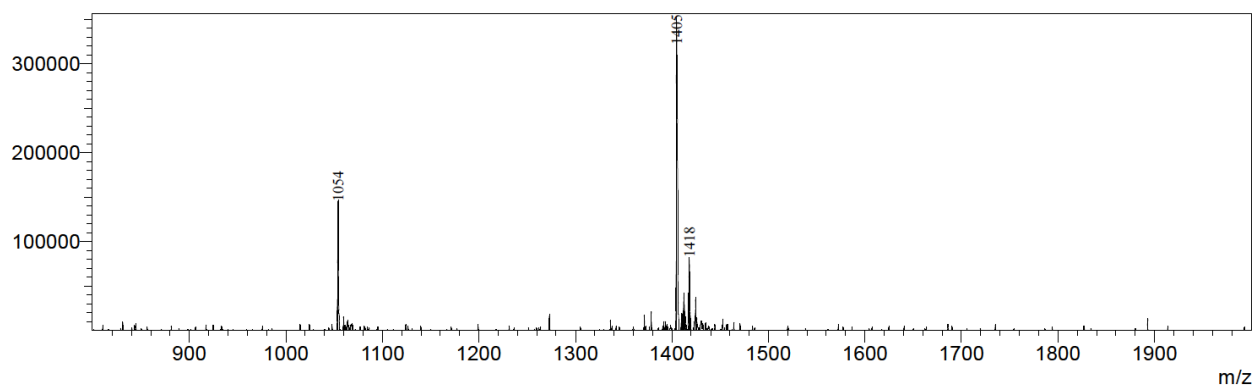

**Figure S13.** ESI-MS of Ex4, expected  $m/z = 4213$ , observed  $m/z = [M+3H^+]^{+3} 1405$ ,  $[M+4H^+]^{+4} 1054$   $m/z$ .

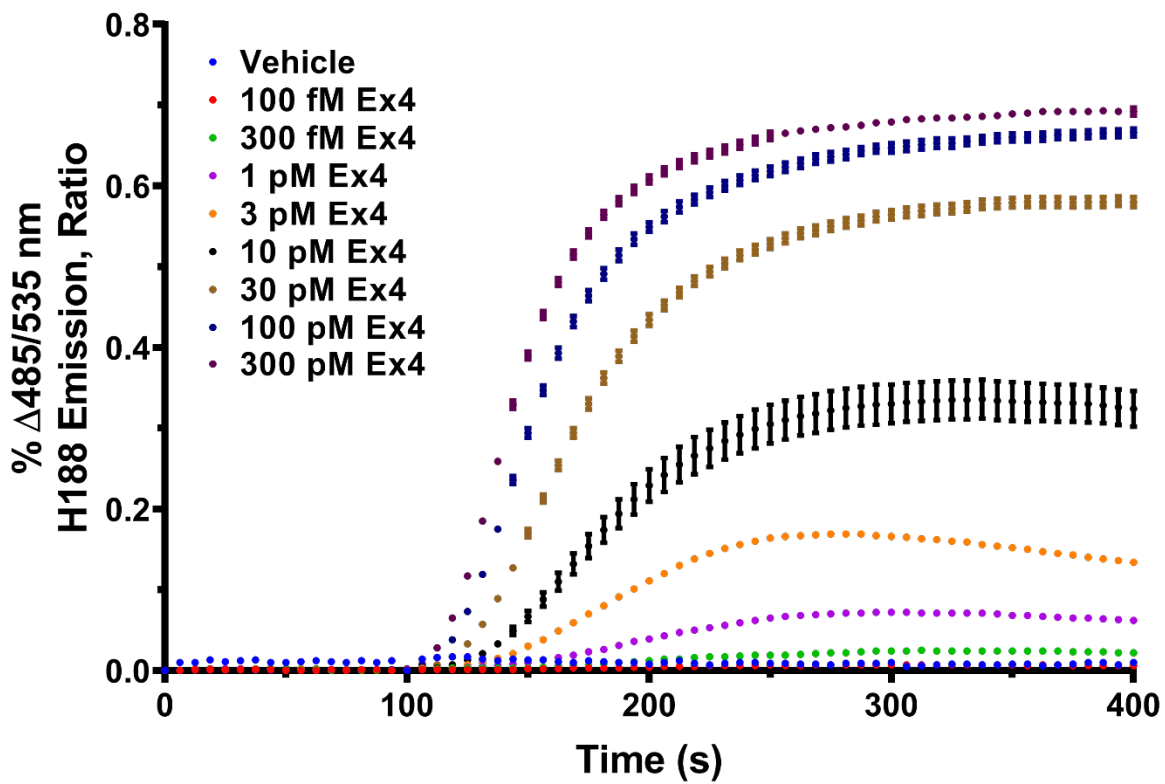

**Figure S14.** *In vitro* dose escalation study of Ex4 showing increase in cAMP levels in GLP-1R stably transfected HEK-293-H188 c20 cells.

mV

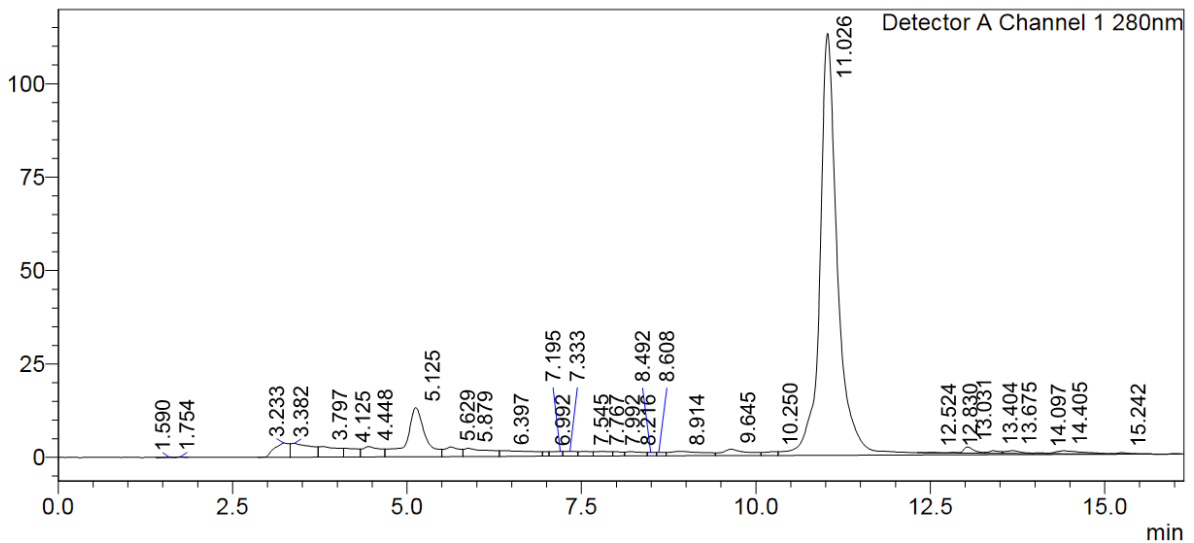

**Figure S15.** RP-HPLC trace showing Ex40 at 11.0 min.

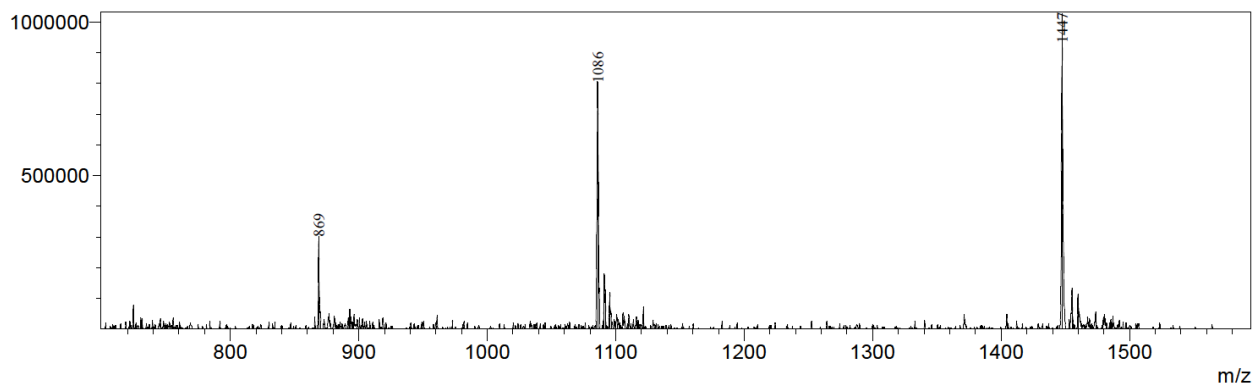

**Figure S16.** ESI-MS of Ex40, expected  $m/z = 4341$ , observed  $m/z = [M+3H^+]^{+3} 1447$ ,  $[M+4H^+]^{+4} 1086$ ,  $[M+5H^+]^{+5} 869$   $m/z$ .

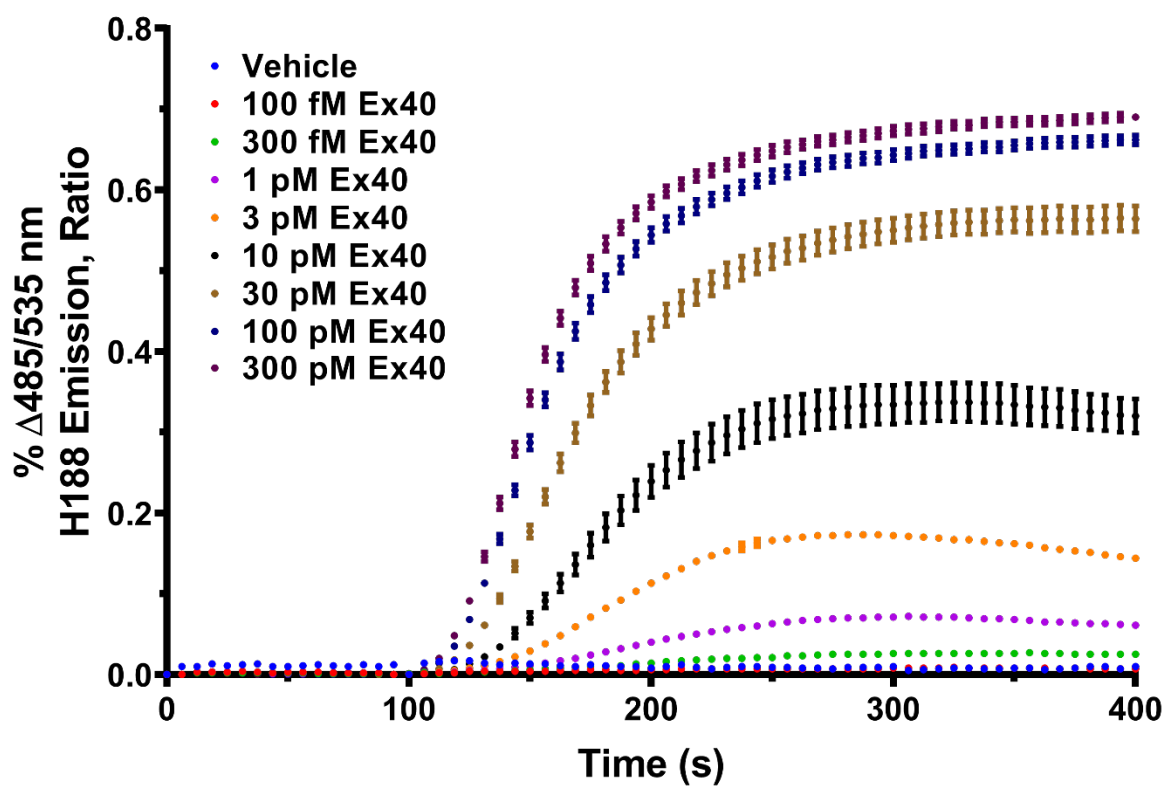

**Figure S17.** *In vitro* dose escalation study of Ex40 showing increase in cAMP levels in GLP-1R stably transfected HEK-293-H188 c20 cells.

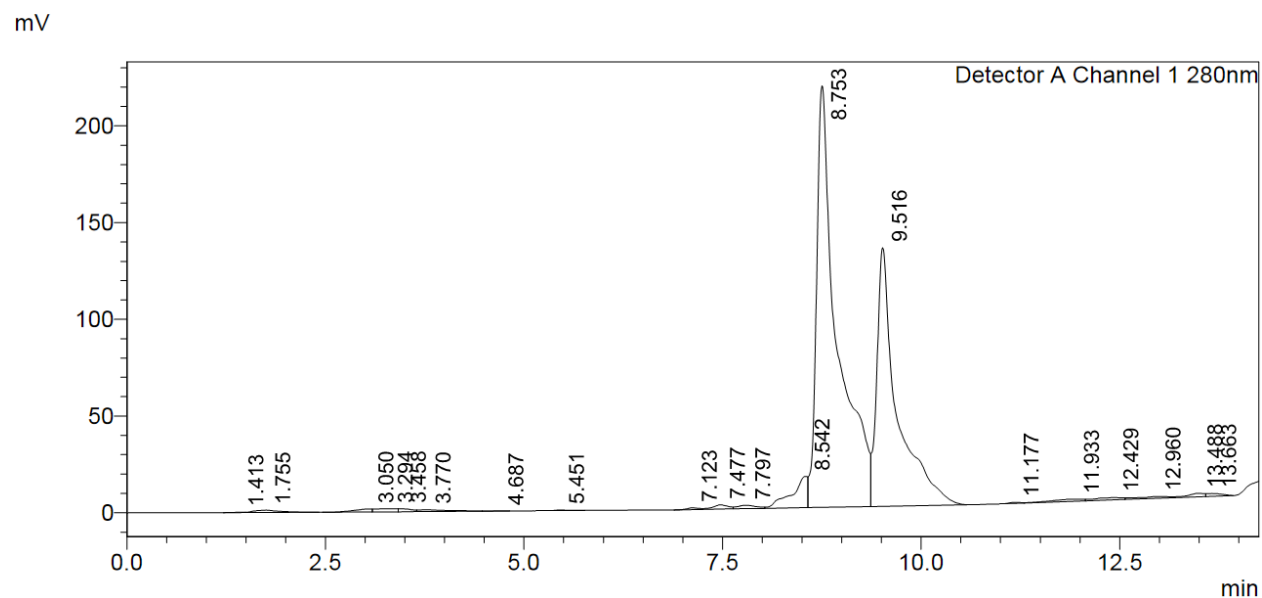

**Figure S18.** RP-HPLC trace showing the  $\alpha$ - and  $\beta$ -isomer products of **4** at 8.8 and 9.5 min.

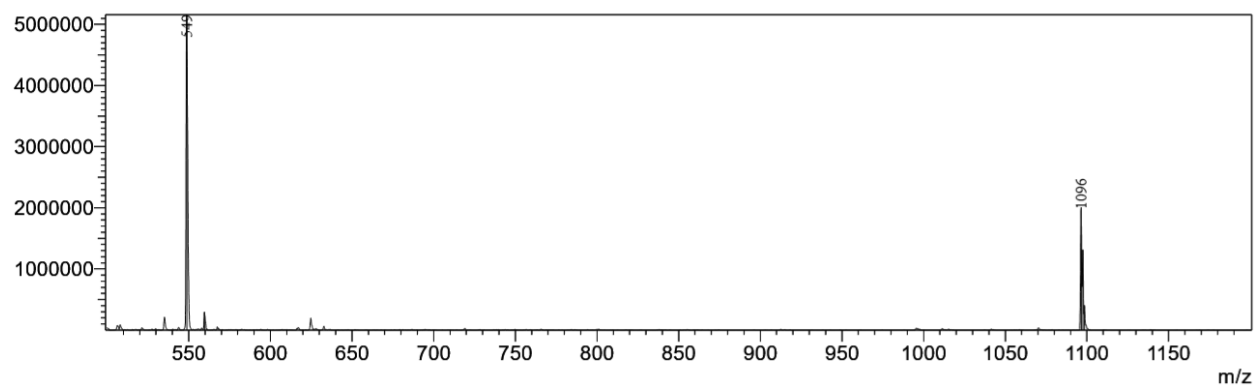

**Figure S19.** ESI-MS of **4**, expected  $m/z$  = 1115, observed  $m/z$  =  $[M^+ - H_2O]^{+1}$  1096,  $[M^+ - H_2O + H^+]^{+2}$  549  $m/z$ .

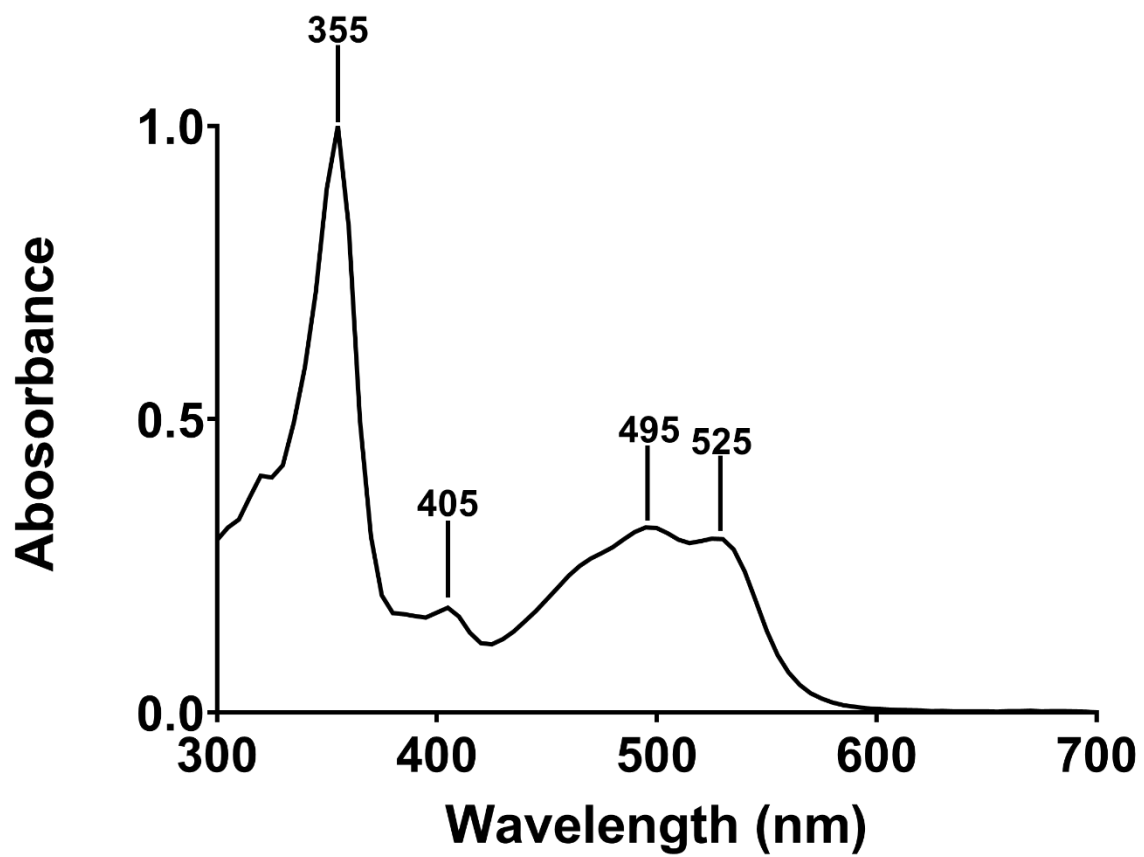

Figure S20. Electronic absorption spectroscopy of 4 in water.

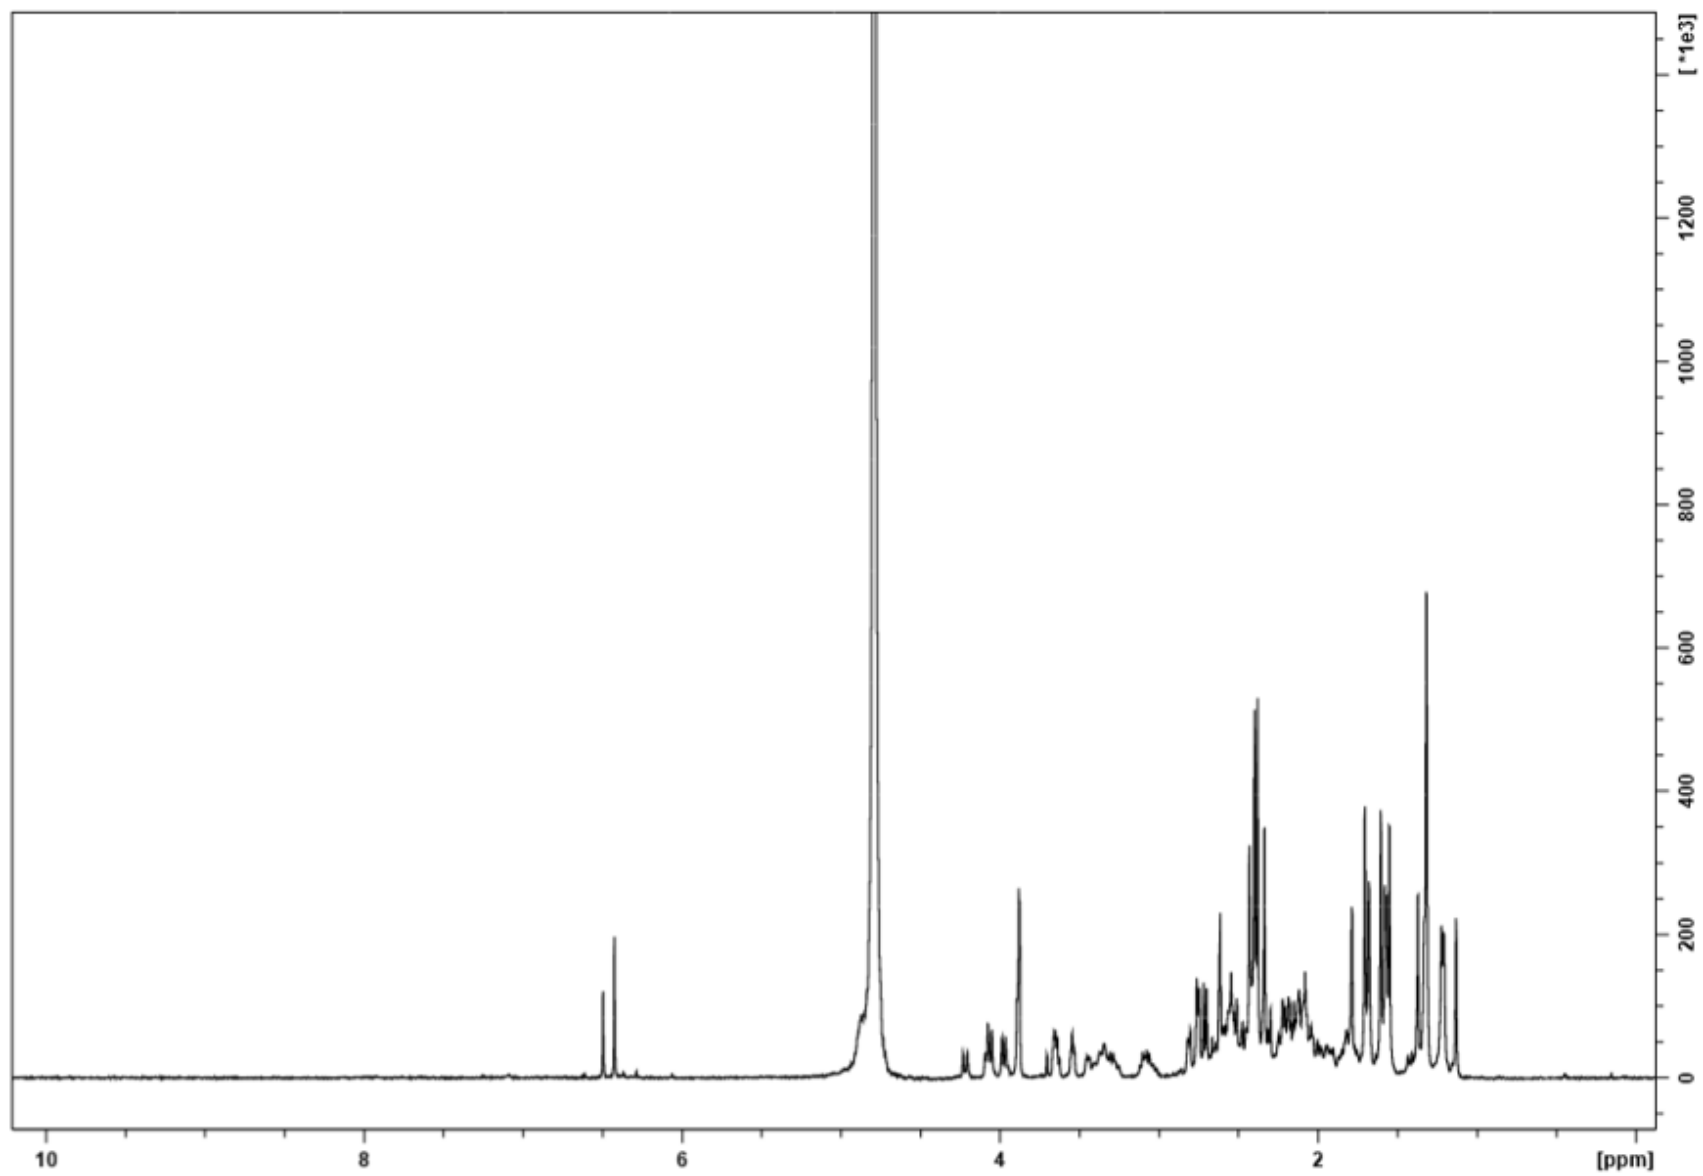

Figure S21.  $^1\text{H}$  NMR of 4. (400 MHz, 298K,  $\text{D}_2\text{O}$ ).

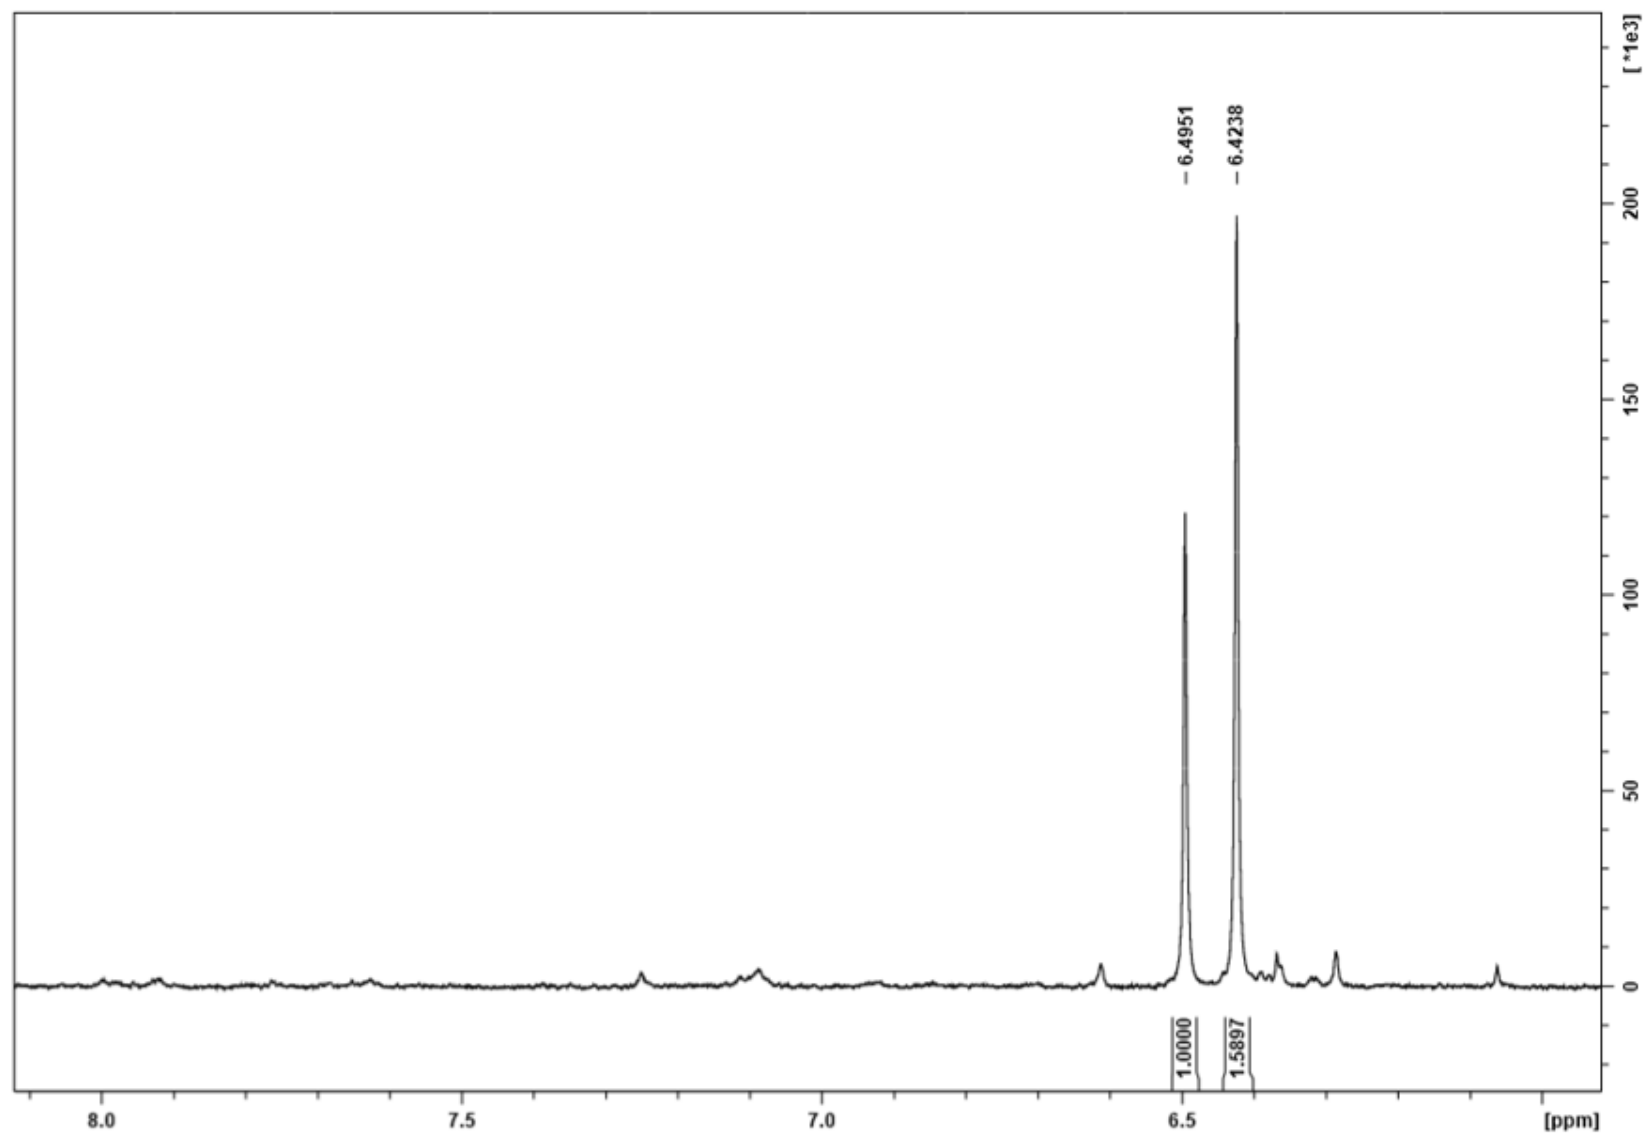

**Figure S22.**  $^1\text{H}$  NMR of **4**. (400 MHz, 298K,  $\text{D}_2\text{O}$ ) (Aromatic). Characteristic signals (H19) of  $\beta$ - (6.50) and  $\alpha$ - (6.42) aquo-isomers of **4** are observed.

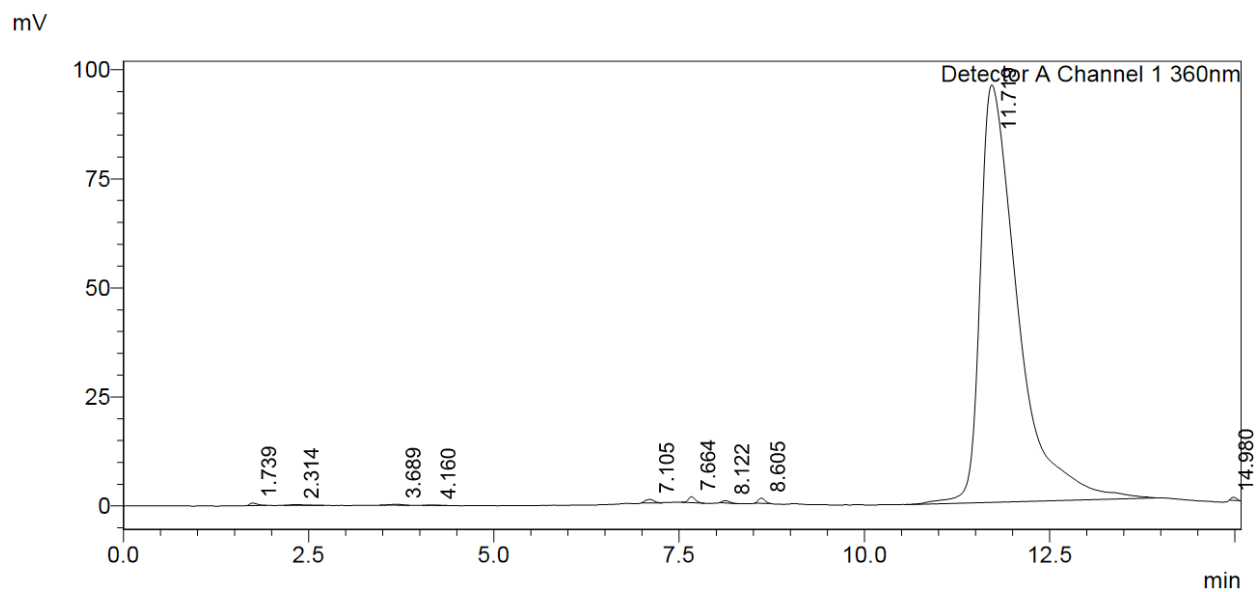

**Figure S23.** RP-HPLC trace showing product **12** at 11.7 min.

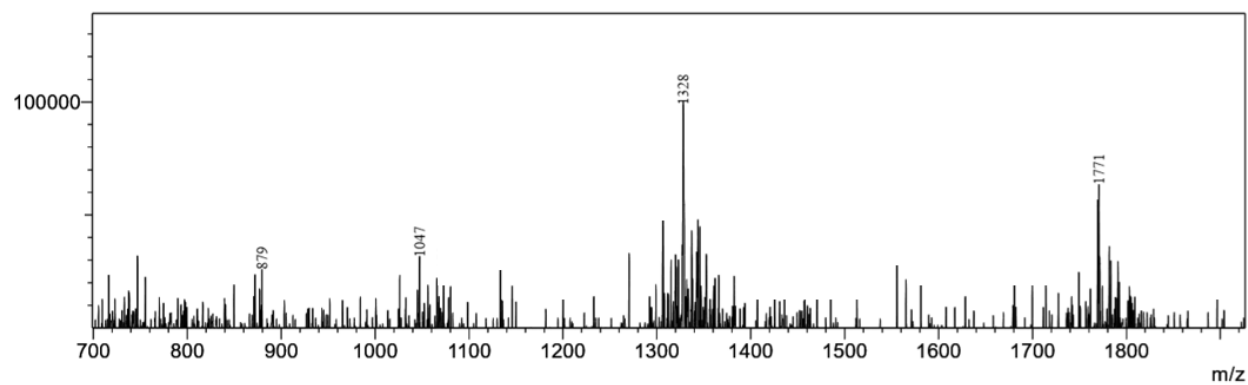

**Figure S24.** ESI-MS of **12**, expected m/z = 5327, observed m/z =  $[M^+ - H_2O + 2H^+]^{+3}$  1771,  $[M^+ - H_2O + 3H^+]^{+4}$ : 1328 m/z.



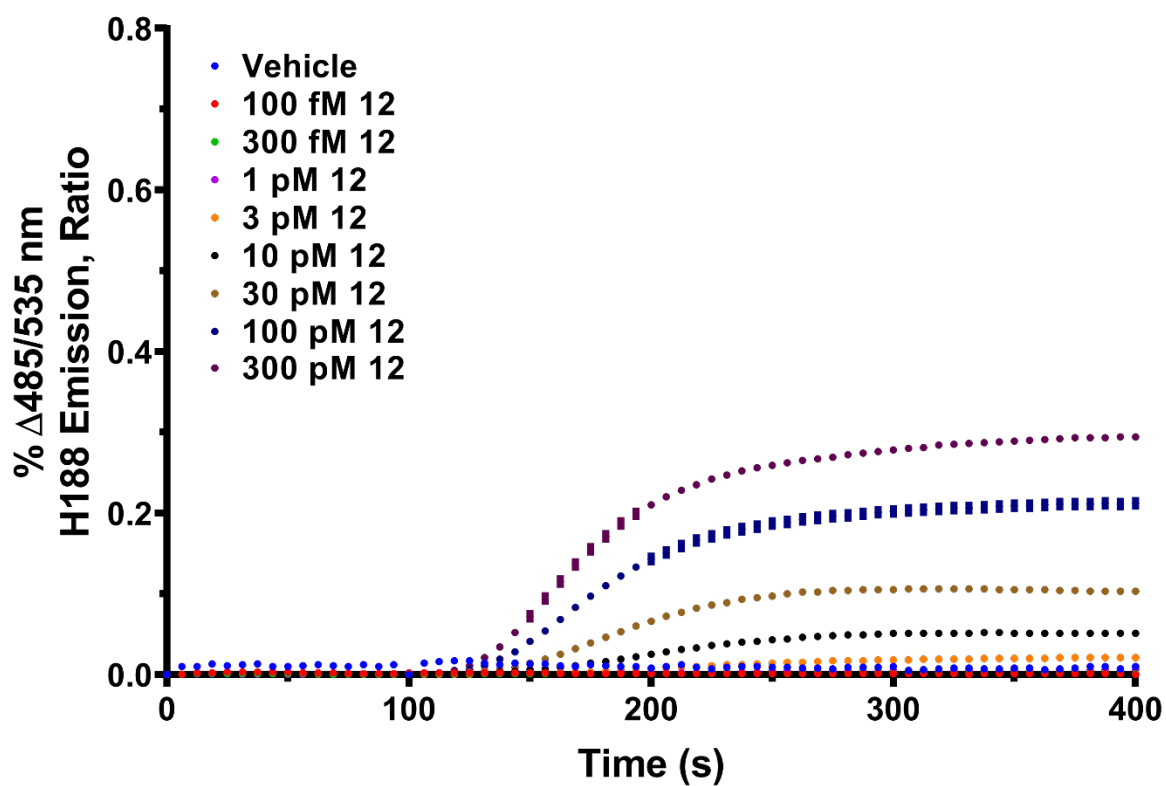

**Figure S25.** *In vitro* dose escalation study of **12** showing increase in cAMP levels in GLP-1R stably transfected HEK-293-H188 c20 cells.

mV

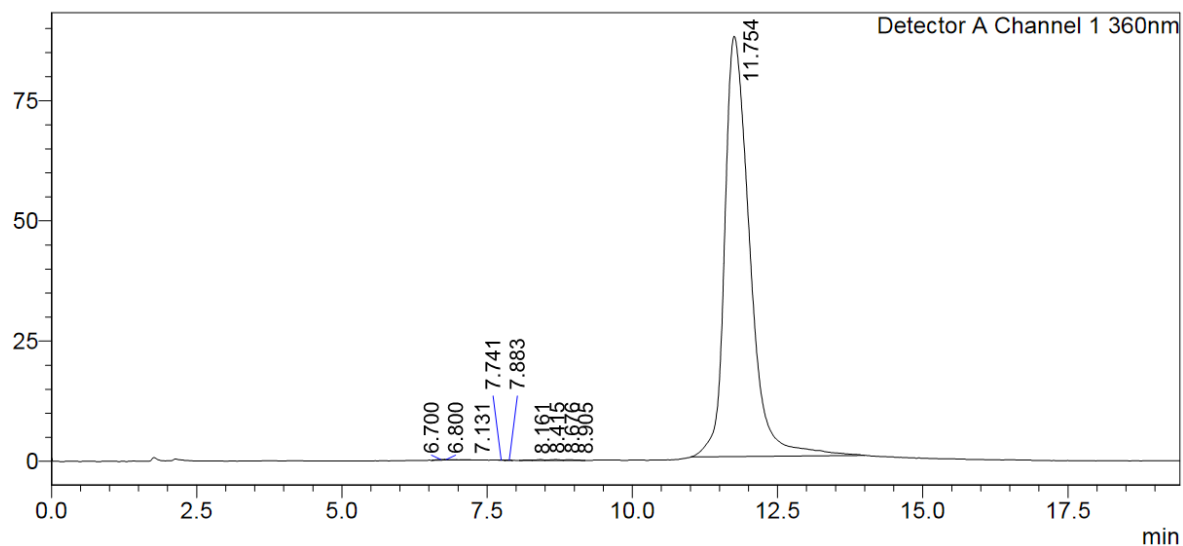

**Figure S26.** RP-HPLC trace showing product **20** at 11.8 min.

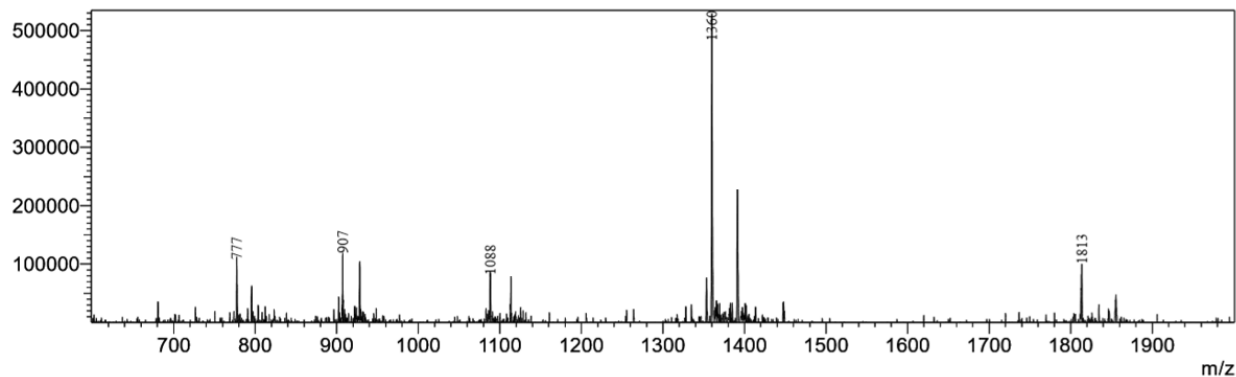

**Figure S27.** ESI-MS of **20**, expected  $m/z = 5456$ , observed  $m/z = [M^+ - H_2O + 2H^+]^{+3} 1813$ ,  $[M^+ - H_2O + 3H^+]^{+4} 1360$ ,  $[M^+ - H_2O + 4H^+]^{+5} 1088$ ,  $[M^+ - H_2O + 5H^+]^{+6} 907$ ,  $[M^+ - H_2O + 6H^+]^{+7} 777$   $m/z$ .

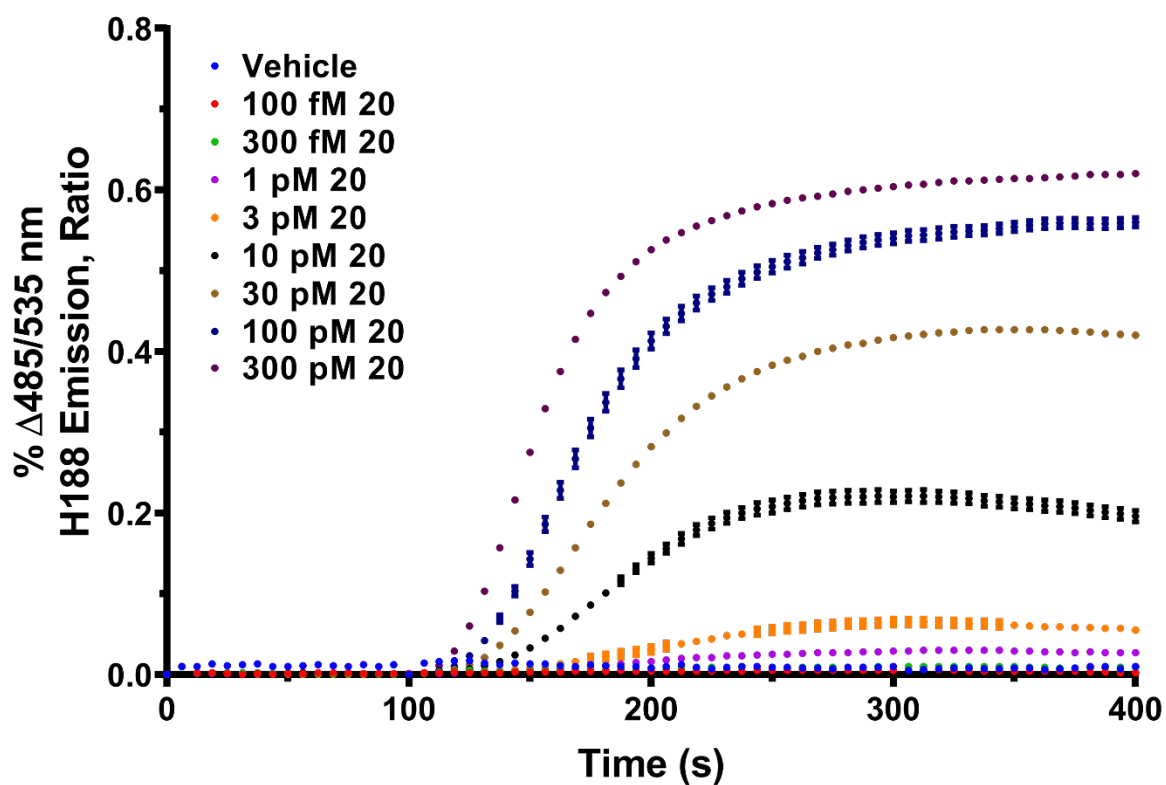

**Figure S28.** *In vitro* dose escalation study of **20** showing increase in cAMP levels in GLP-1R stably transfected HEK-293-H188 c20 cells.

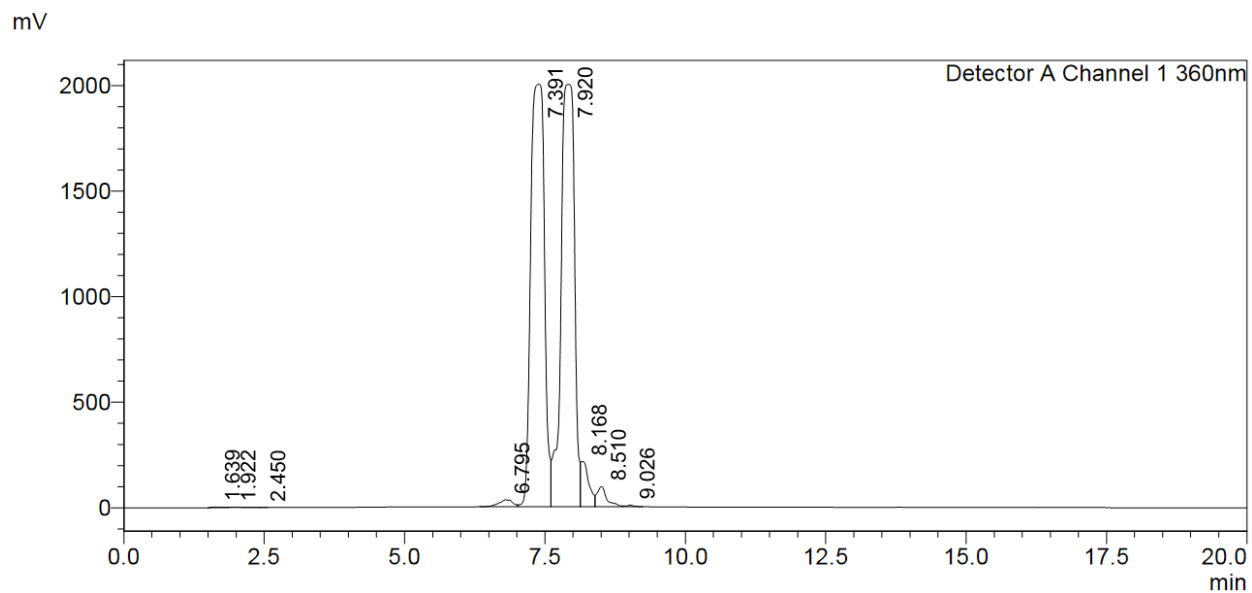

**Figure S29.** RP-HPLC trace showing the  $\alpha$ - and  $\beta$ -isomer products of **5** at 7.4 and 7.9 min.

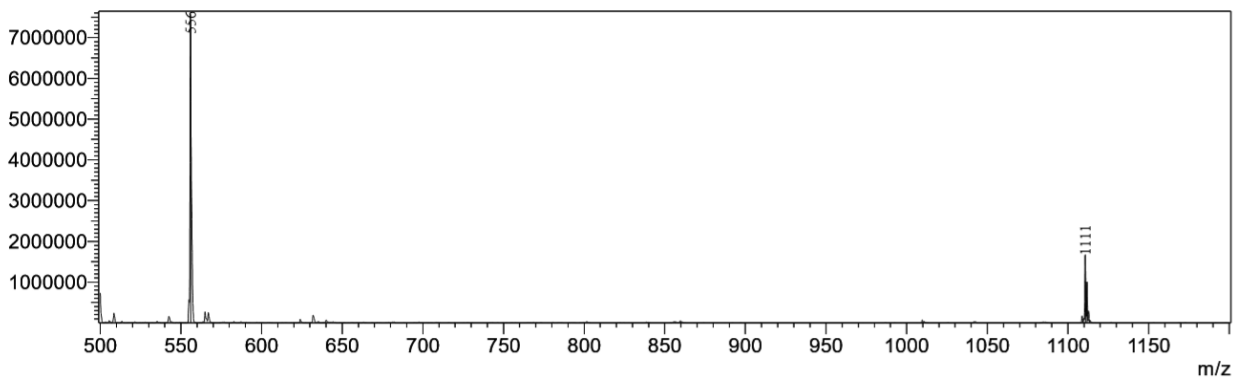

**Figure S30.** ESI-MS of **5**, expected  $m/z = 1129$ , observed  $m/z = [M+H_2O]^{+1} 1111$ ,  $[M+H_2O+H]^{+2} 556$   $m/z$ .

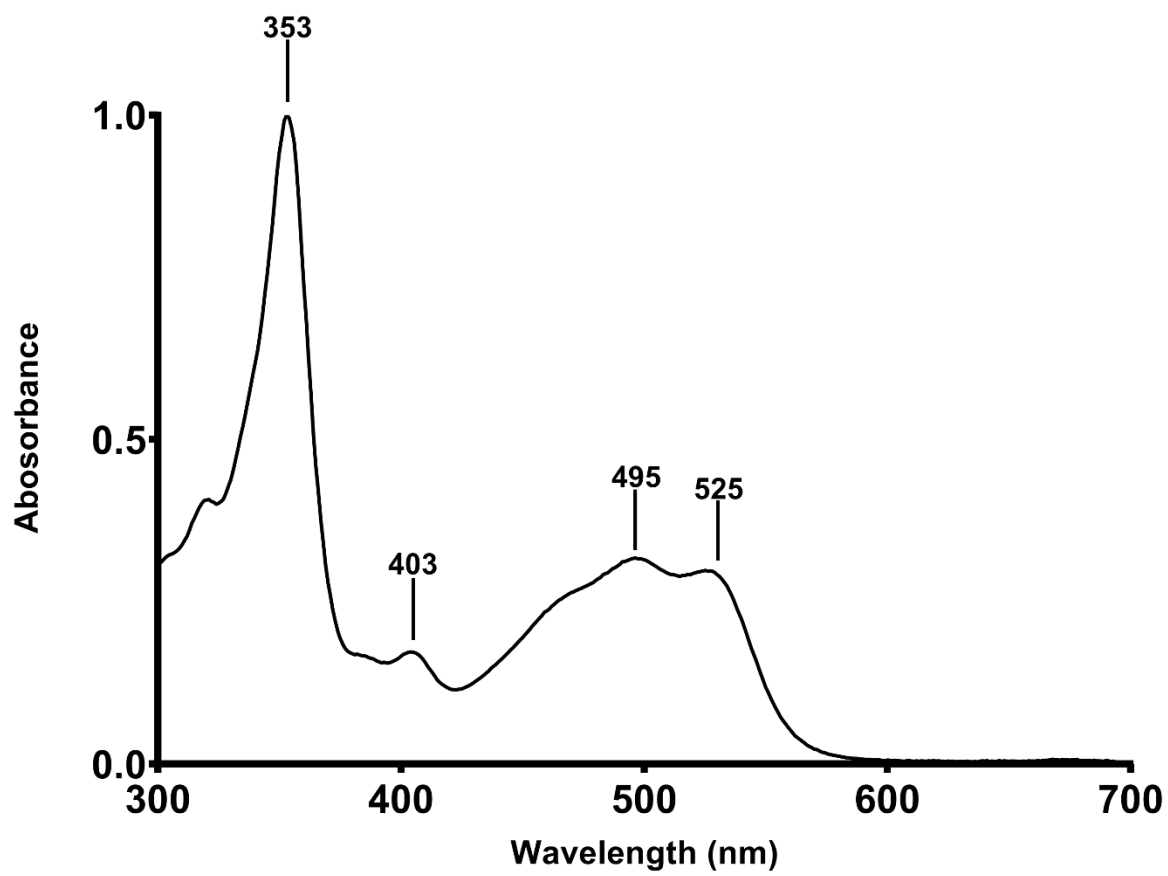

Figure S31. Electronic absorption spectroscopy of 5 in water.

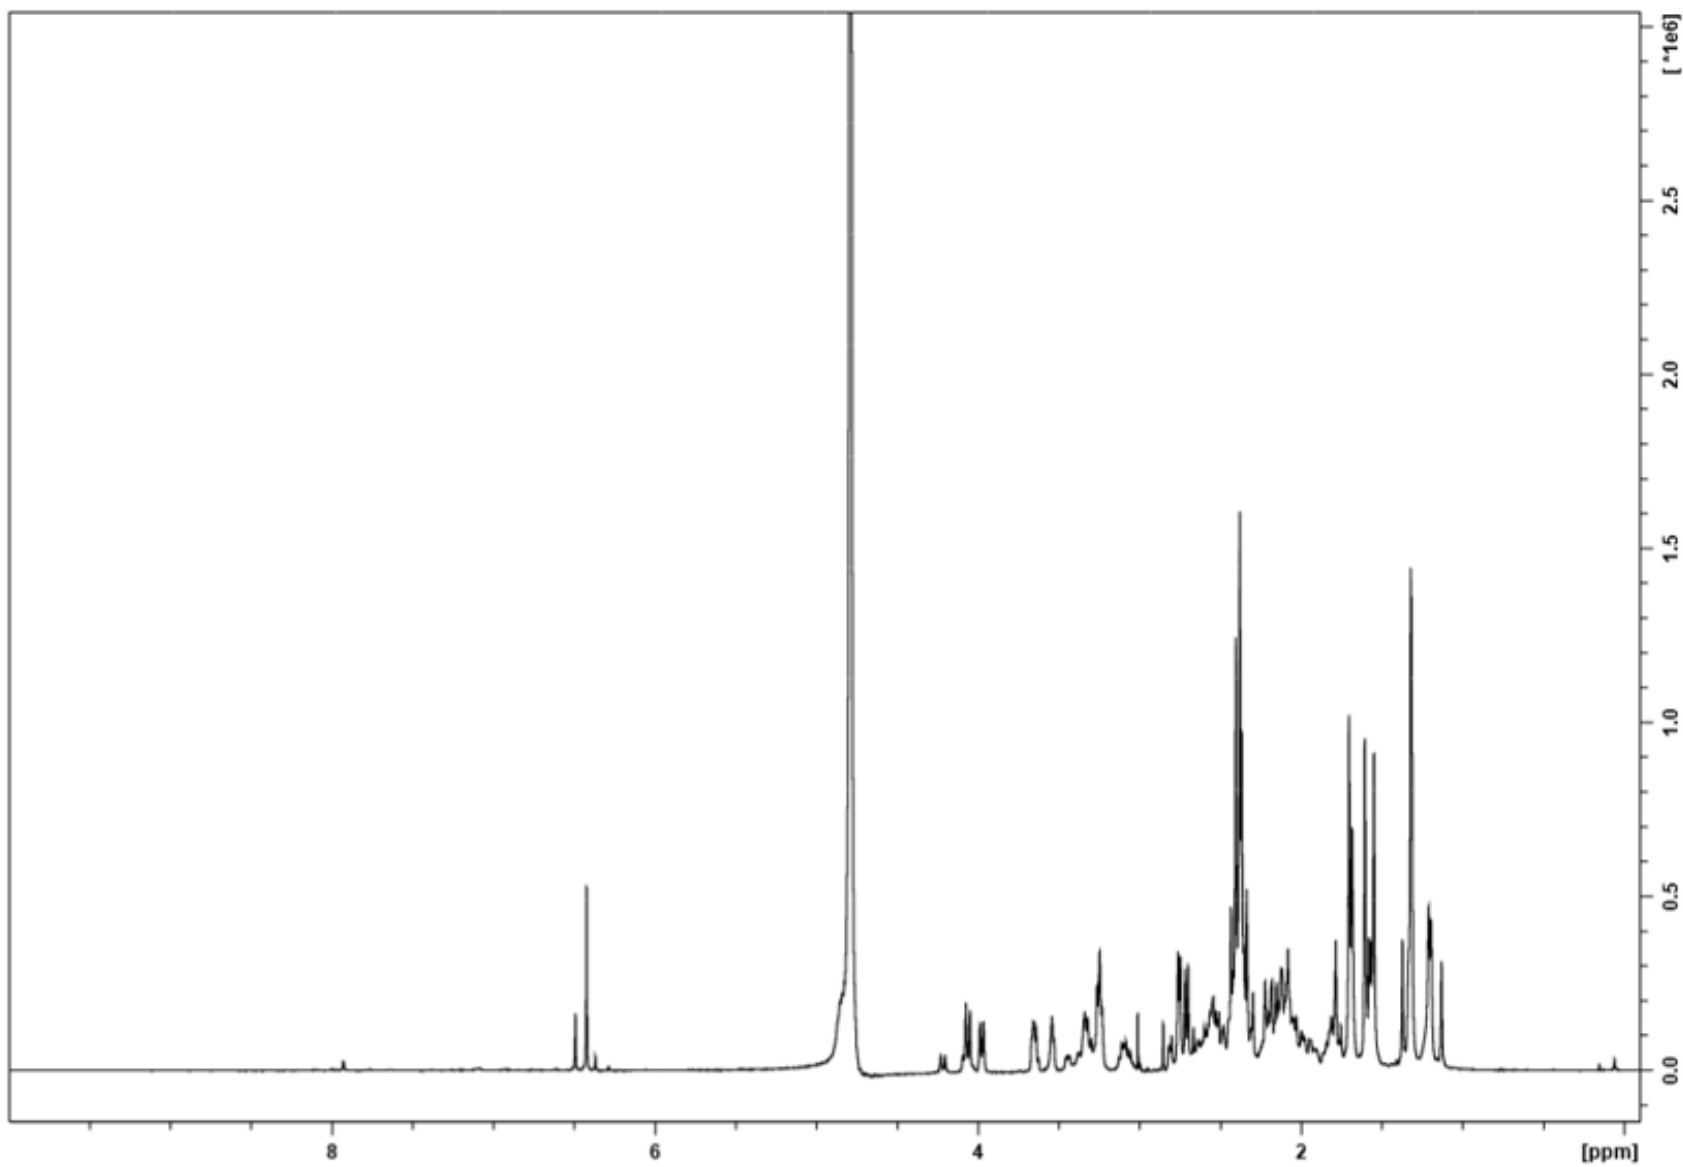

Figure S32.  $^1\text{H}$  NMR of 5 (400 MHz, 298K,  $\text{D}_2\text{O}$ ).

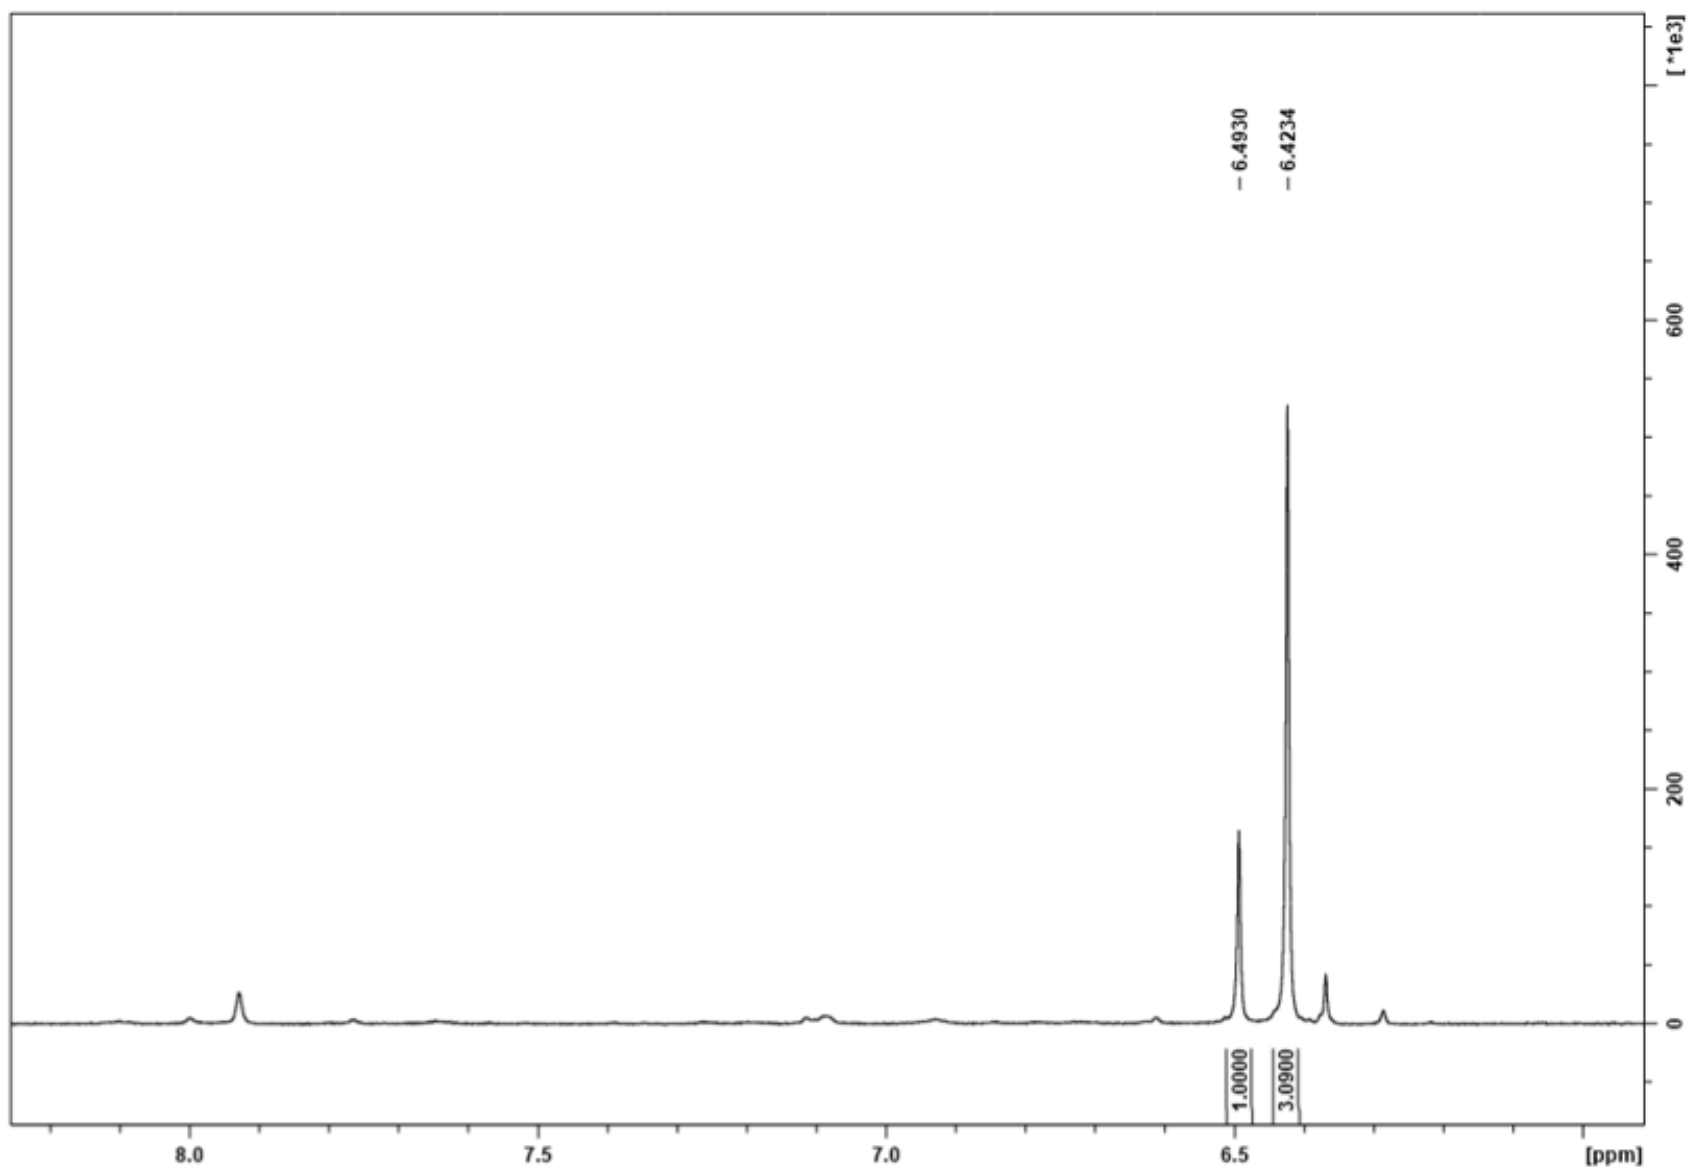

**Figure S33.**  $^1\text{H}$  NMR of **5** (400 MHz, 298K,  $\text{D}_2\text{O}$ ) (Aromatic). Characteristic signals (H19) of  $\beta$ - (6.49) and  $\alpha$ - (6.42) aquo-isomers of **5** are observed.

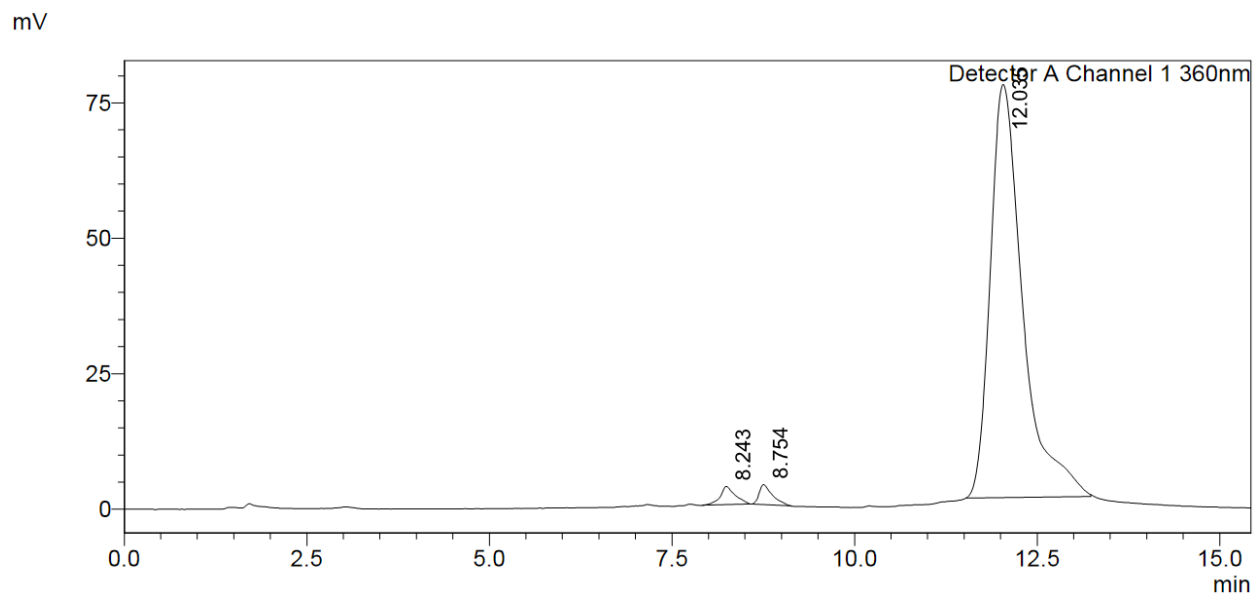

**Figure S34.** RP-HPLC trace showing product **13** at 12.0 min.

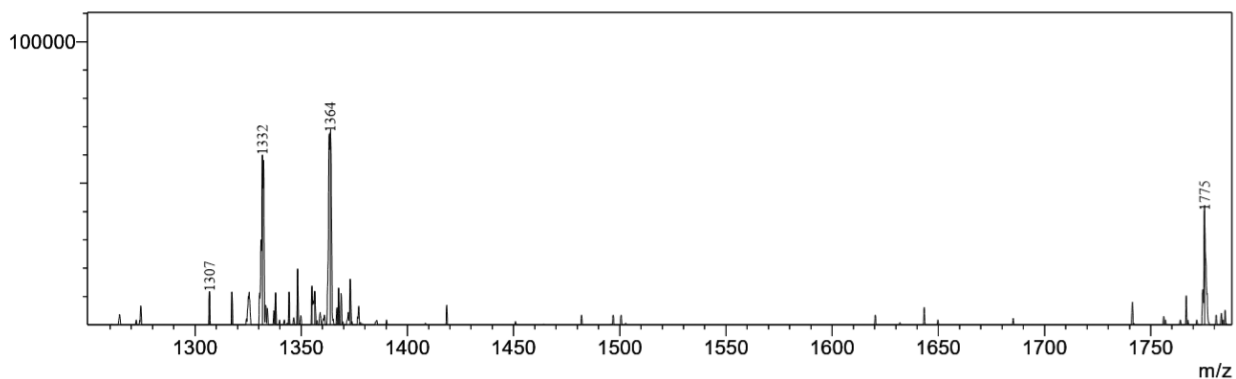

**Figure S35.** ESI-MS of **13**, expected  $m/z = 5341$ , observed  $m/z = [M^+ - H_2O + 2H^+]^{+3} 1775$ ,  $[M^+ - H_2O + 3H^+ + CH_3OH]^{+4} 1364$ ,  $[M^+ - H_2O + 3H^+]^{+4} 1332$   $m/z$ .

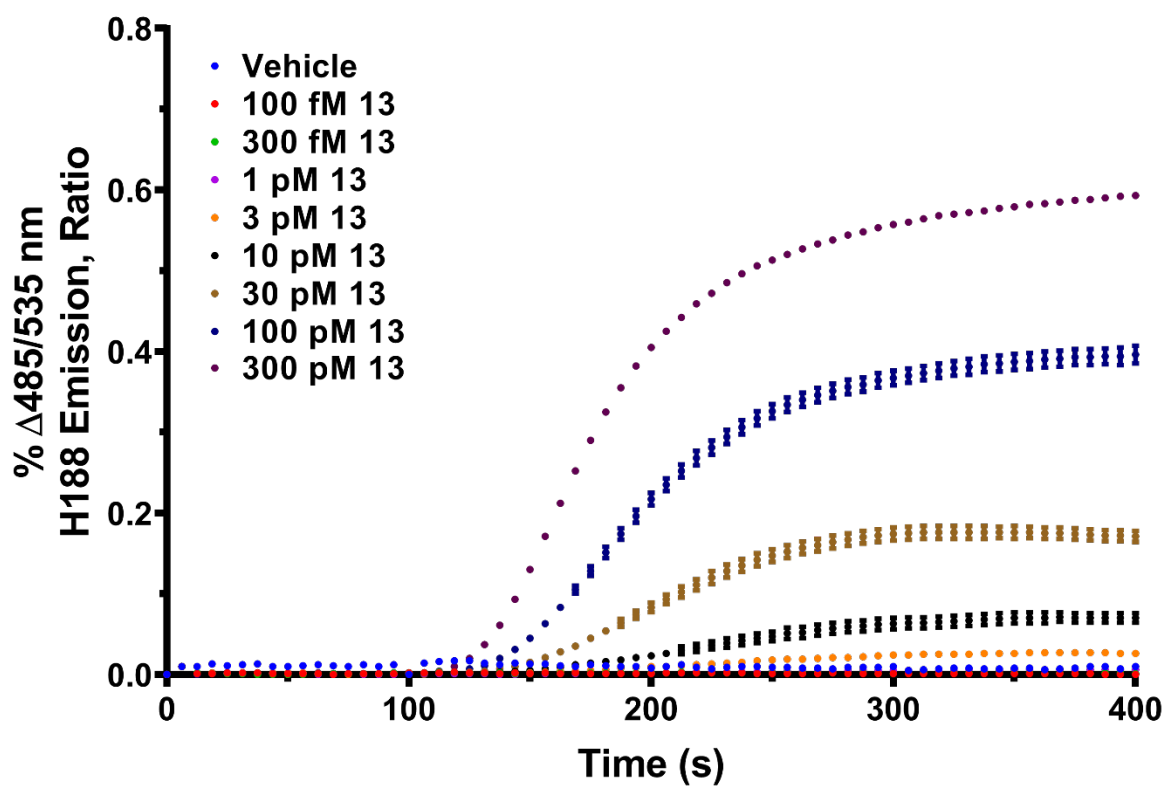

**Figure S36.** *In vitro* dose escalation study of **13** showing increase in cAMP levels in GLP-1R stably transfected HEK-293-H188 c20 cells.

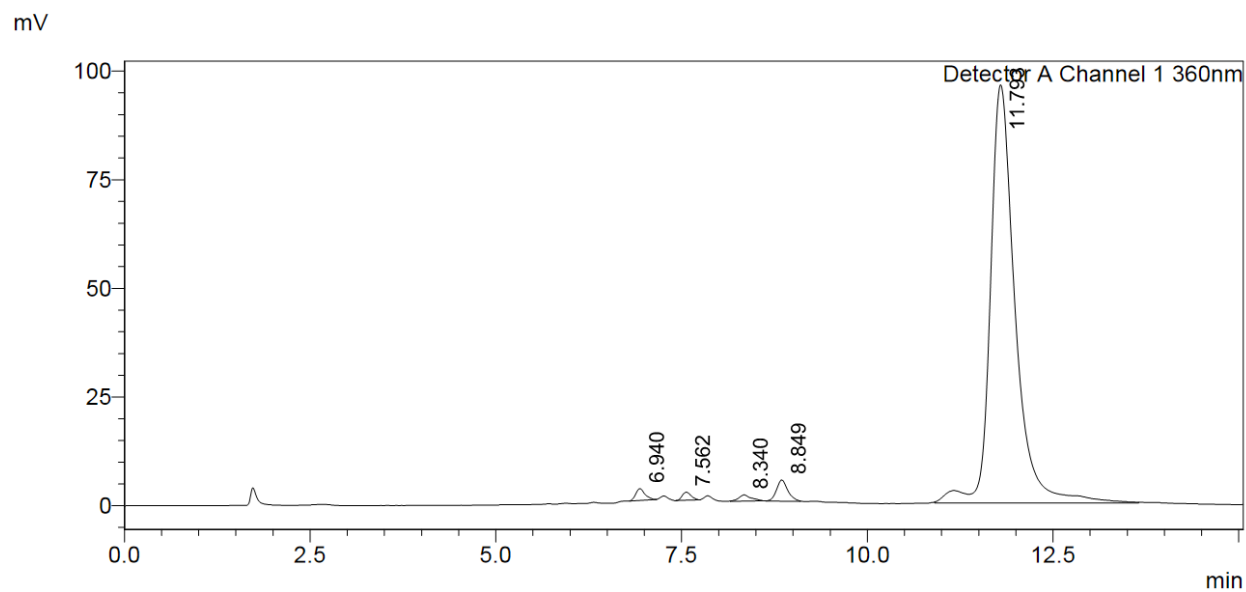

**Figure S37.** RP-HPLC trace showing product **21** at 11.8 min.



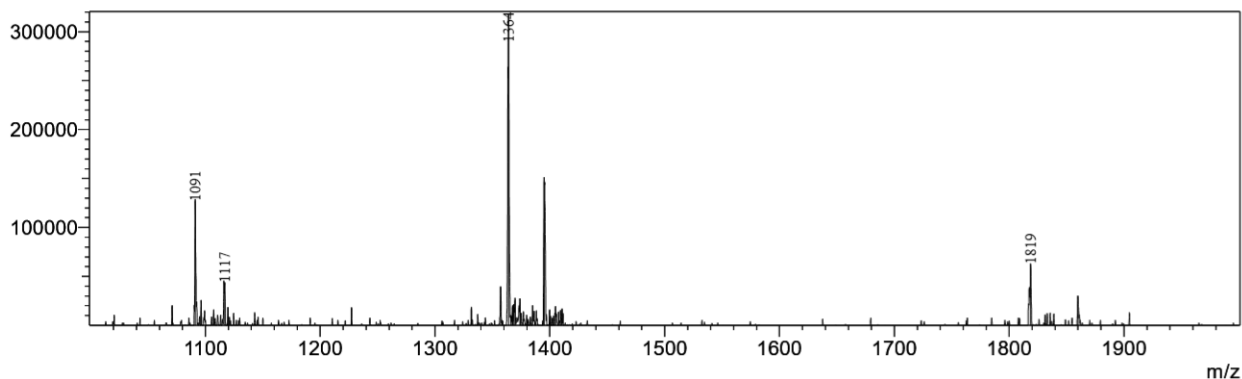

**Figure S38.** ESI-MS of **21**, expected  $m/z = 5469$ , observed  $m/z = [M^+ - H_2O + 2H^+ + CH_3CN]^{+3} 1859$ ,  $[M^+ - H_2O + 2H^+]^{+3} 1819$ ,  $[M^+ - H_2O + 3H^+ + CH_3OH]^{+4} 1395$ ,  $[M^+ - H_2O + 3H^+]^{+4} 1364$   $[M^+ - H_2O + 4H^+]^{+5} 1091$   $m/z$ .

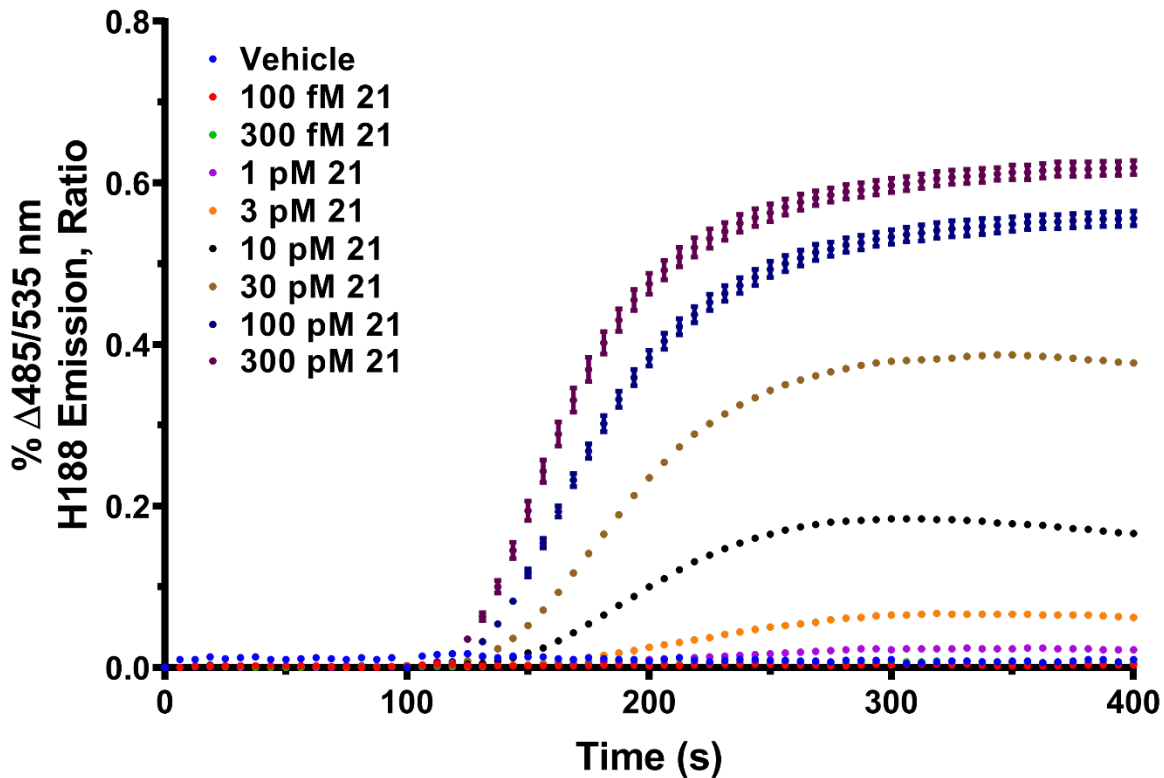

**Figure S39.** *In vitro* dose escalation study of **21** showing increase in cAMP levels in GLP-1R stably transfected HEK-293-H188 c20 cells.

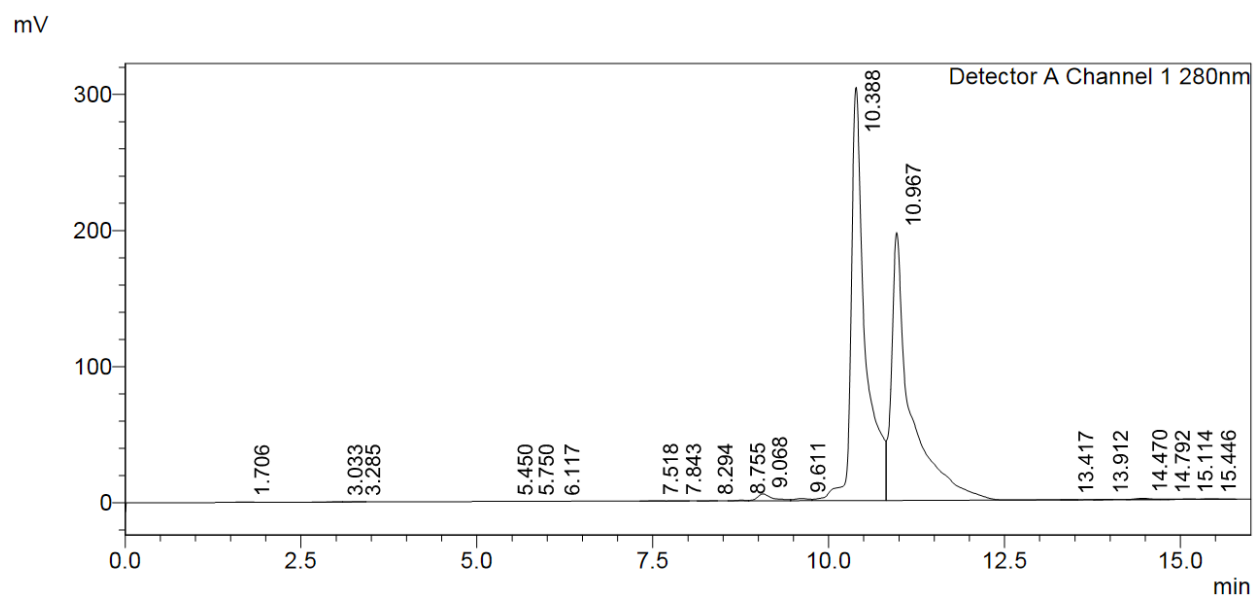

**Figure S40.** RP-HPLC trace showing the  $\alpha$ - and  $\beta$ -isomer products of **6** at 10.4 and 11.0 min.

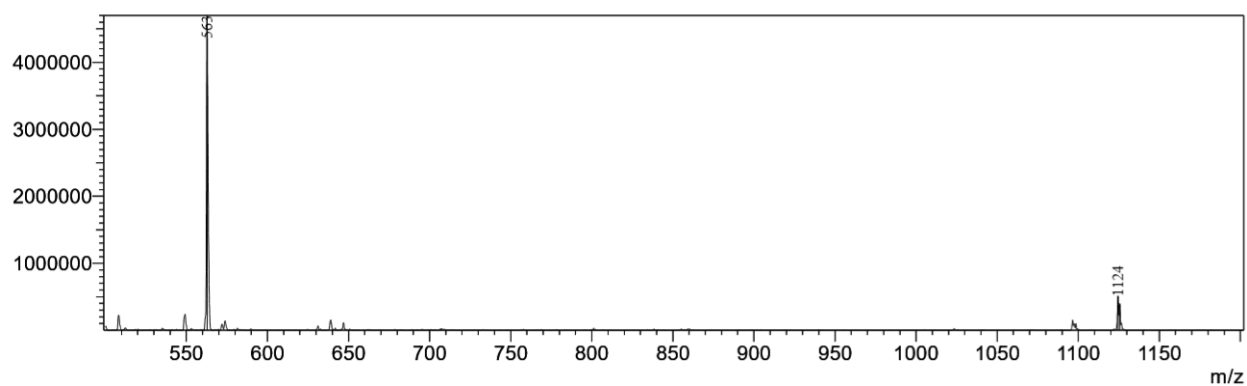

**Figure S41.** ESI-MS of **6**, expected m/z = 1143, observed m/z =  $[M^+ - H_2O]^{+1}$  1124,  $[M^+ - H_2O + H^+]^{+2}$  563 m/z.

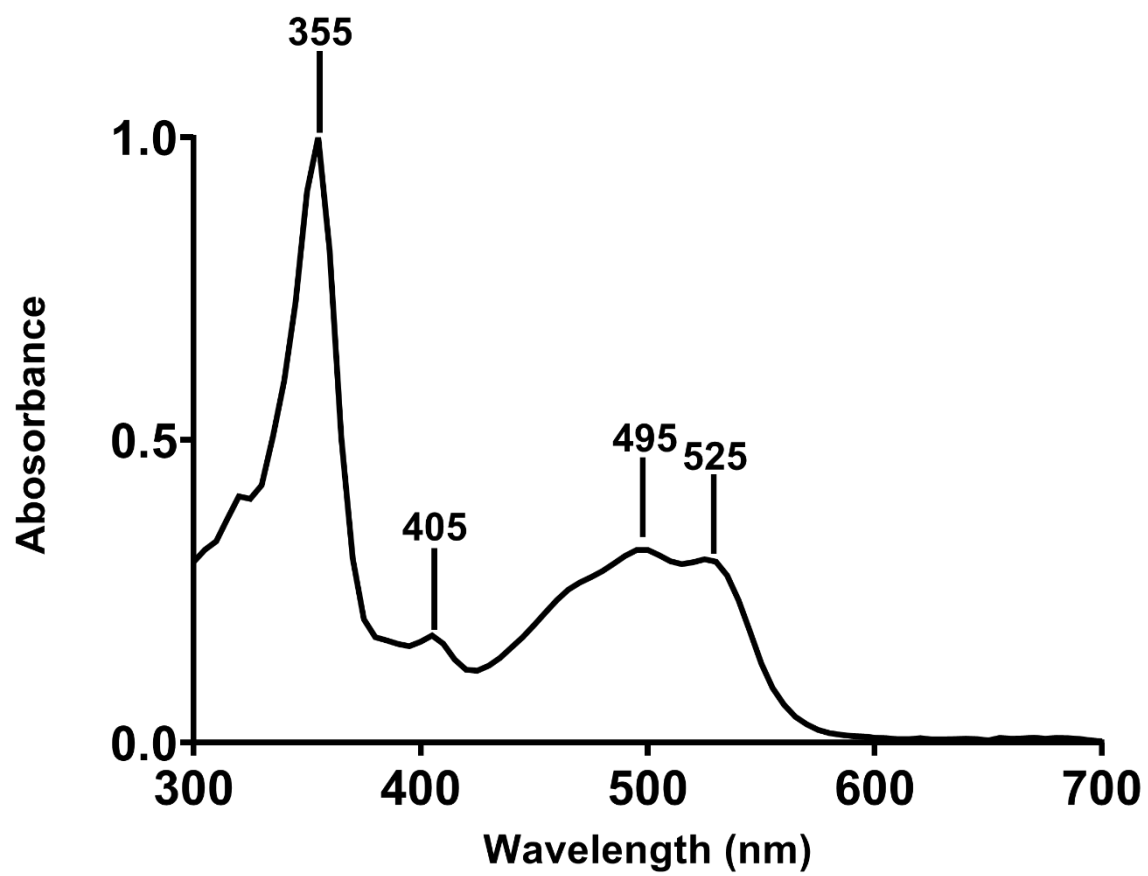

Figure S42. Electronic absorption spectra of 6 in water.

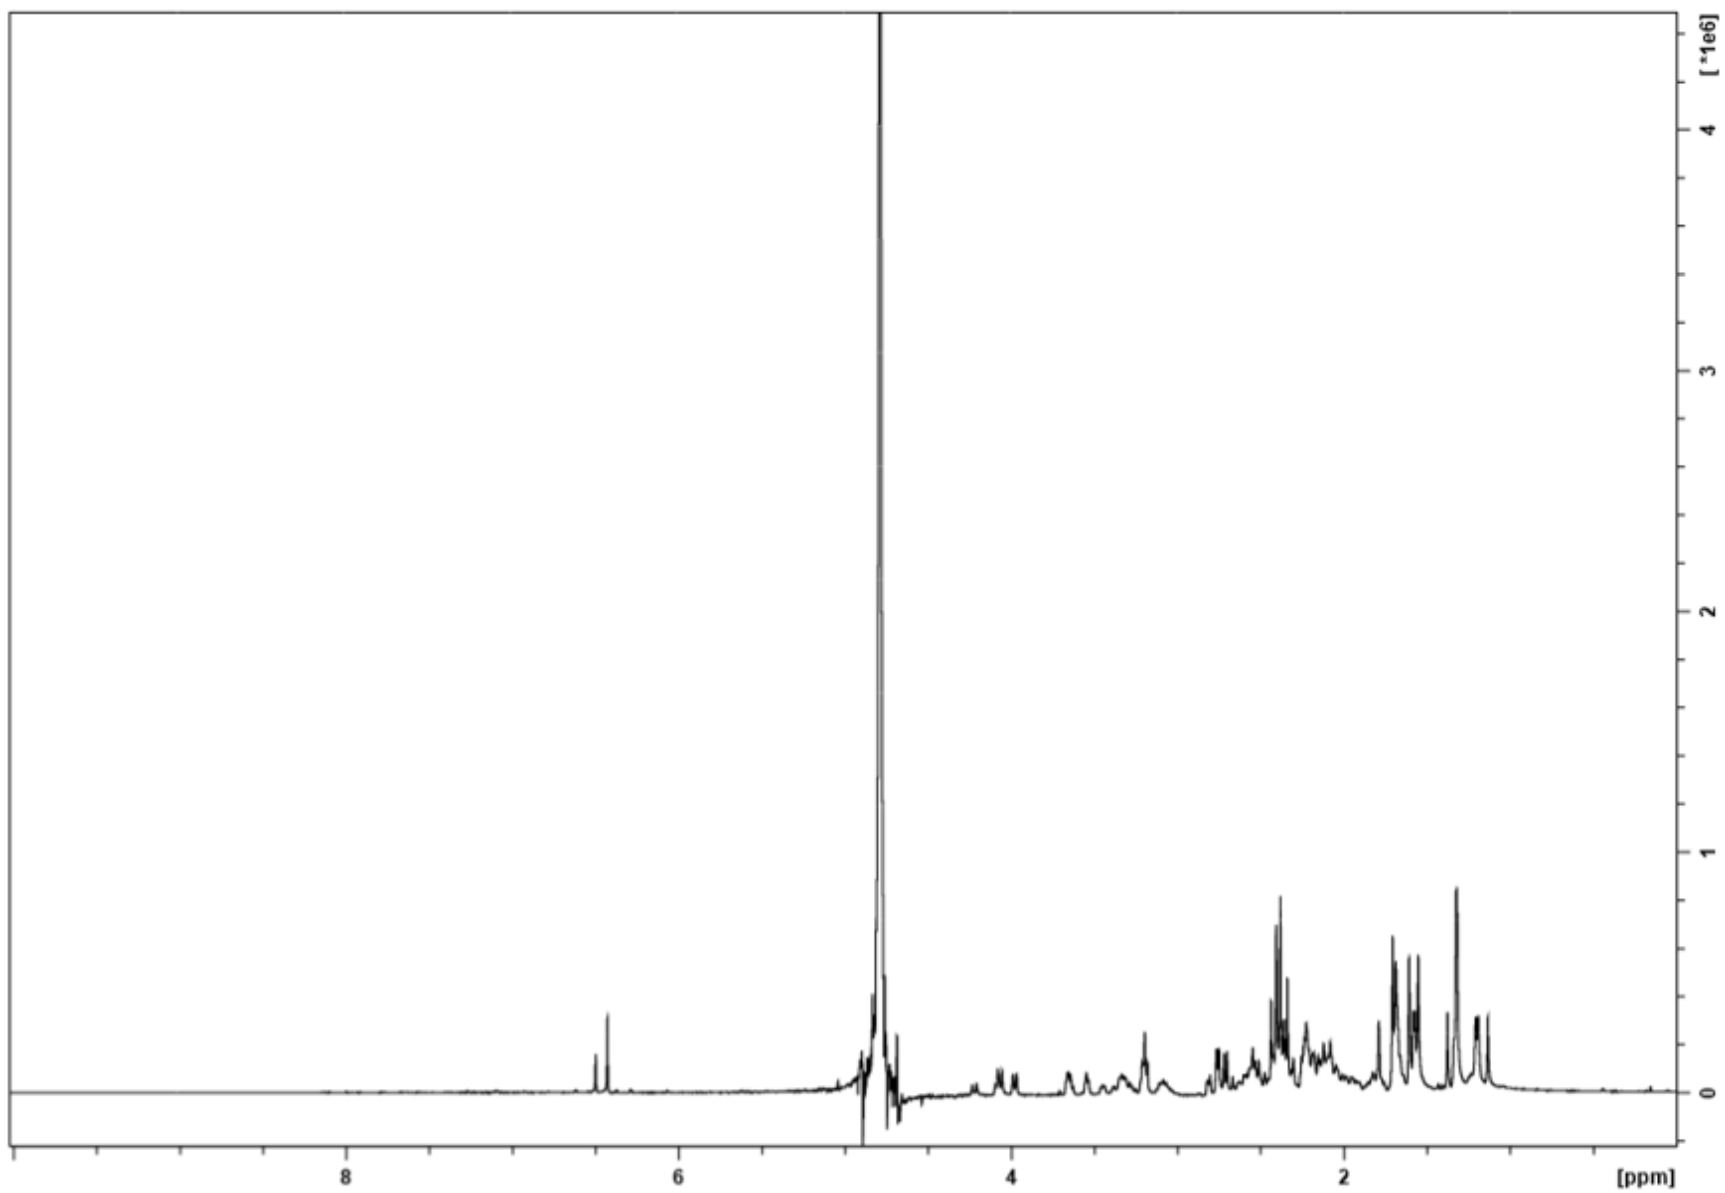

**Figure S43.**  $^1\text{H}$  NMR of **6** (400 MHz, 298K,  $\text{D}_2\text{O}$ ).

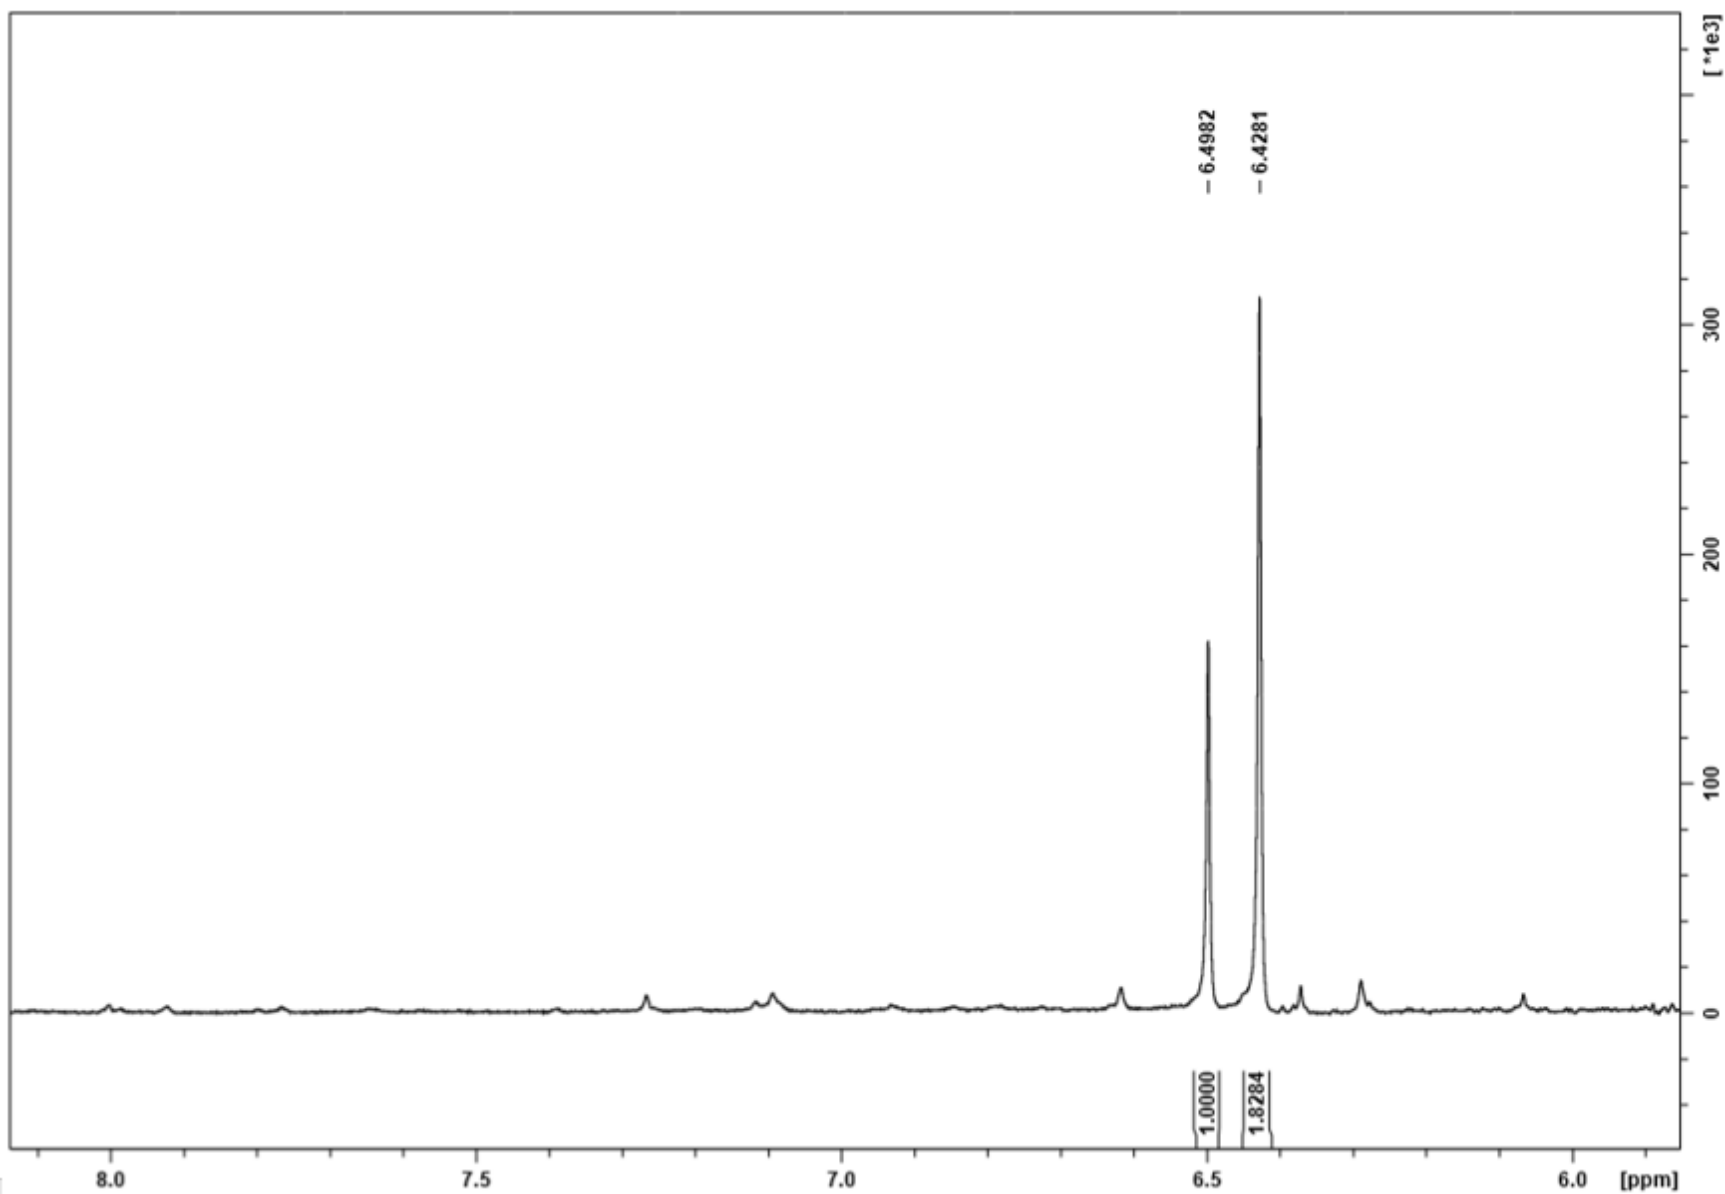

**Figure S44.**  $^1\text{H}$  NMR of **6** (400 MHz, 298K,  $\text{D}_2\text{O}$ ) (Aromatic). Characteristic signals (H19) of  $\beta$ - (6.50) and  $\alpha$ - (6.43) aquo-isomers of **6** are observed.

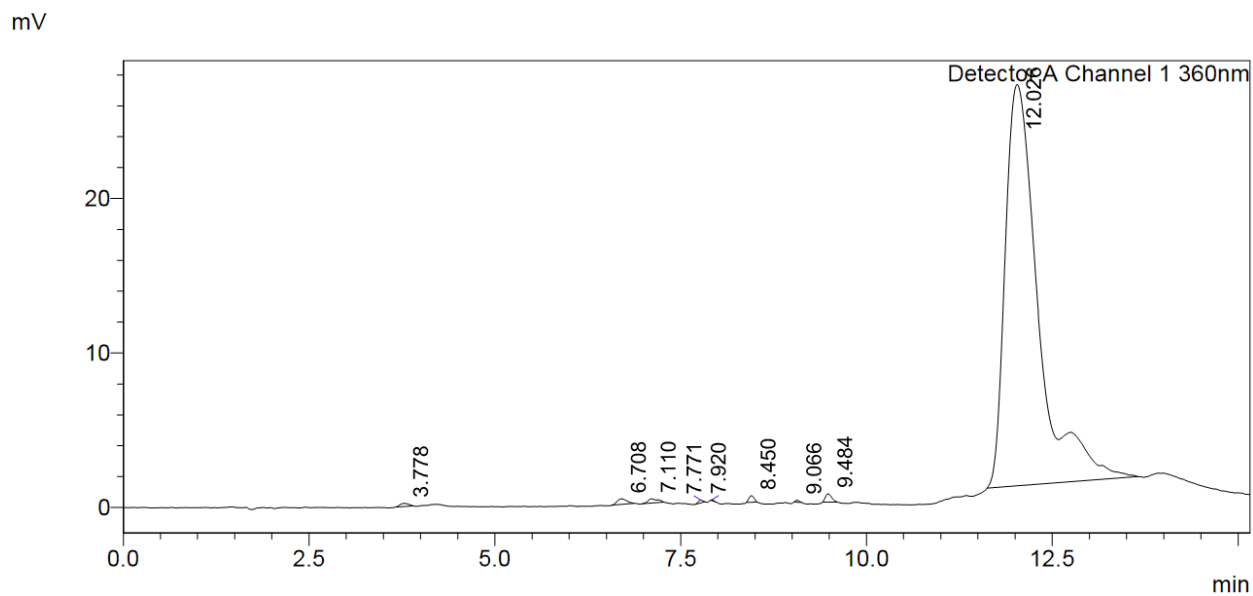

**Figure S45.** RP-HPLC trace showing product **14** at 12.0 min.

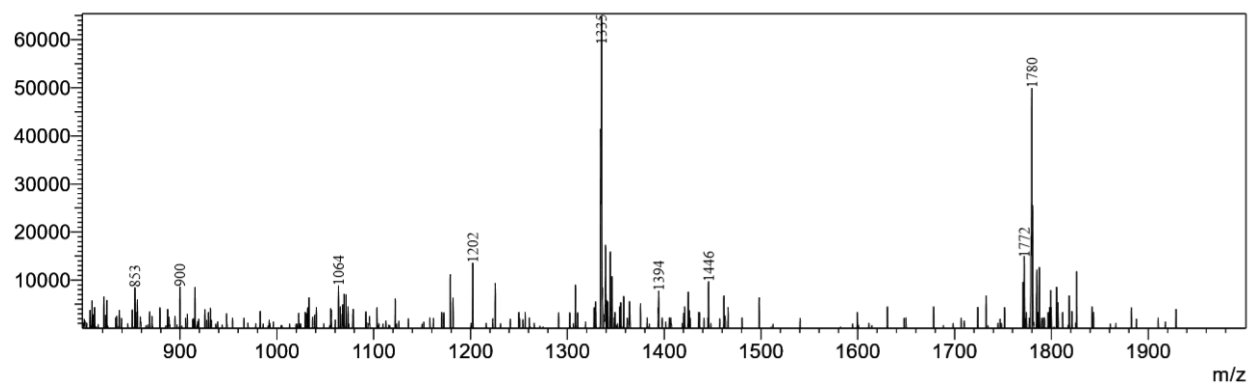

**Figure S46.** ESI-MS of **14**, expected  $m/z = 5355$ , observed  $m/z = [M^+ - H_2O + 2H^+]^{+3} 1780$ ,  $[M^+ - H_2O + 3H^+]^{+4} 1335$   $m/z$ .

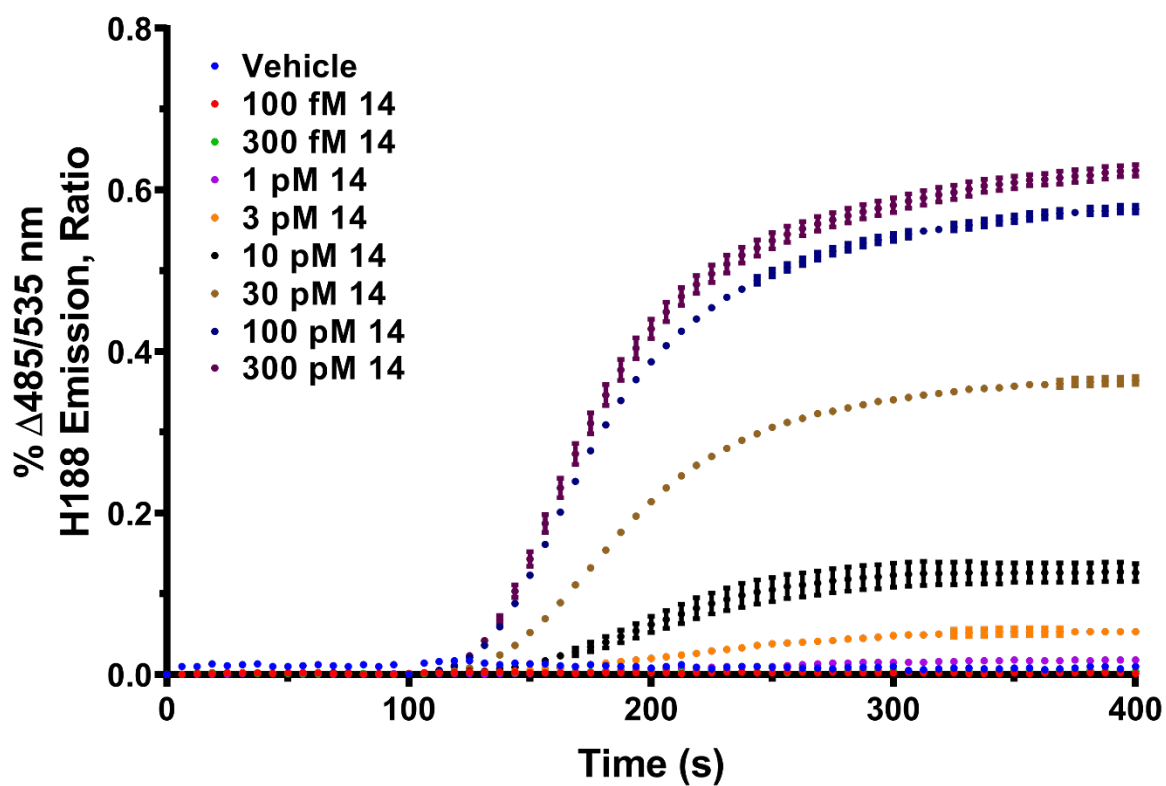

**Figure S47.** *In vitro* dose escalation study of **14** showing increase in cAMP levels in GLP-1R stably transfected HEK-293-H188 c20 cells.  
mV

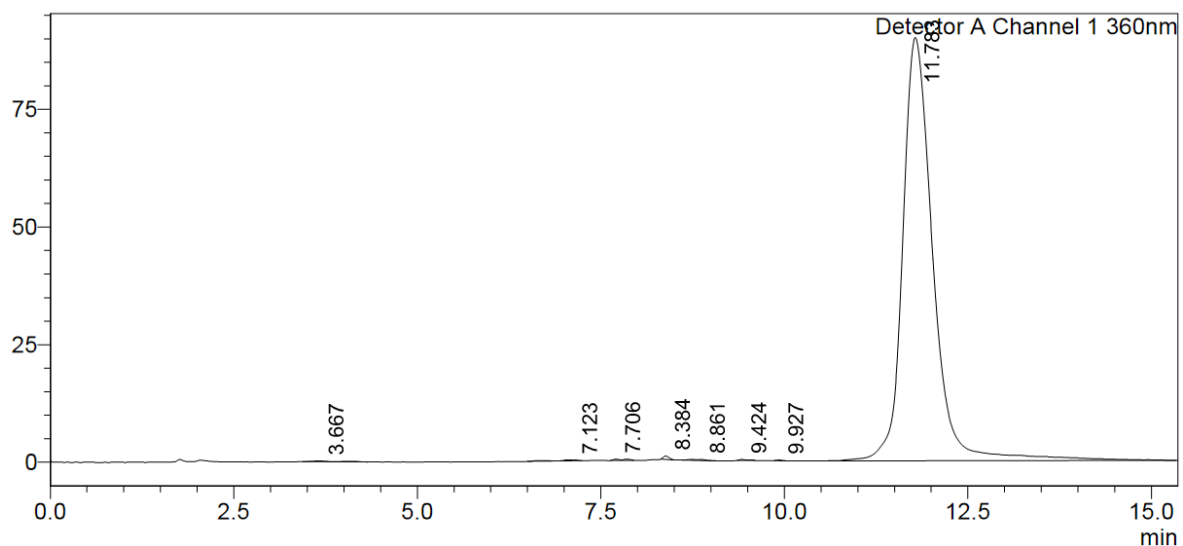

**Figure S48.** RP-HPLC trace showing product **22** at 11.8 min.

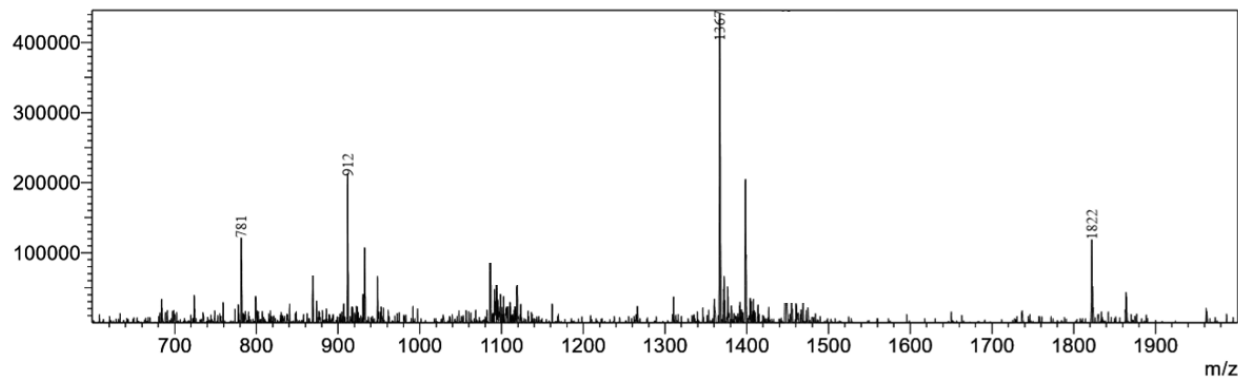

**Figure S49.** ESI-MS of **22**, expected  $m/z = 5483$ , observed  $m/z = [M^+ - H_2O + 2H^+]^{+3} 1822$ ,  $[M^+ - H_2O + 3H^+]^{+4} 1367$ ,  $[M^+ - H_2O + 5H^+]^{+6} 912$ ,  $[M^+ - H_2O + 6H^+]^{+7} 781$   $m/z$ .

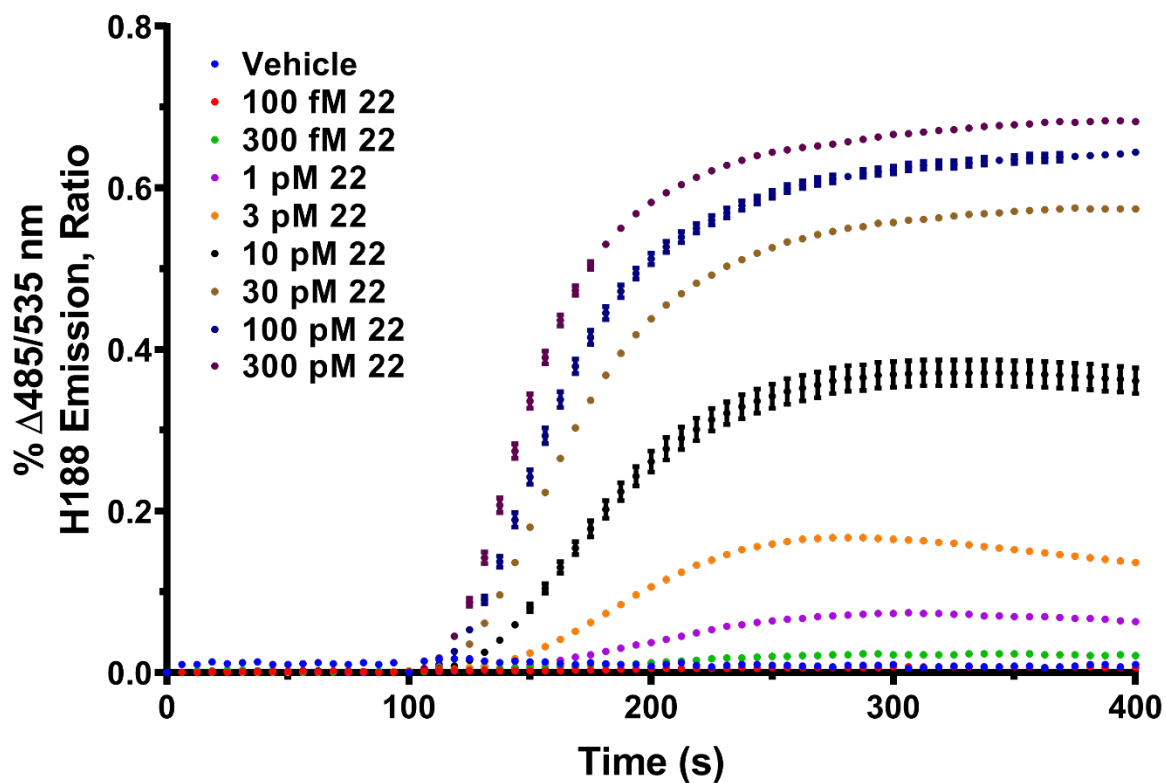

**Figure S50.** *In vitro* dose escalation study of **22** showing increase in cAMP levels in GLP-1R stably transfected HEK-293-H188 c20 cells.



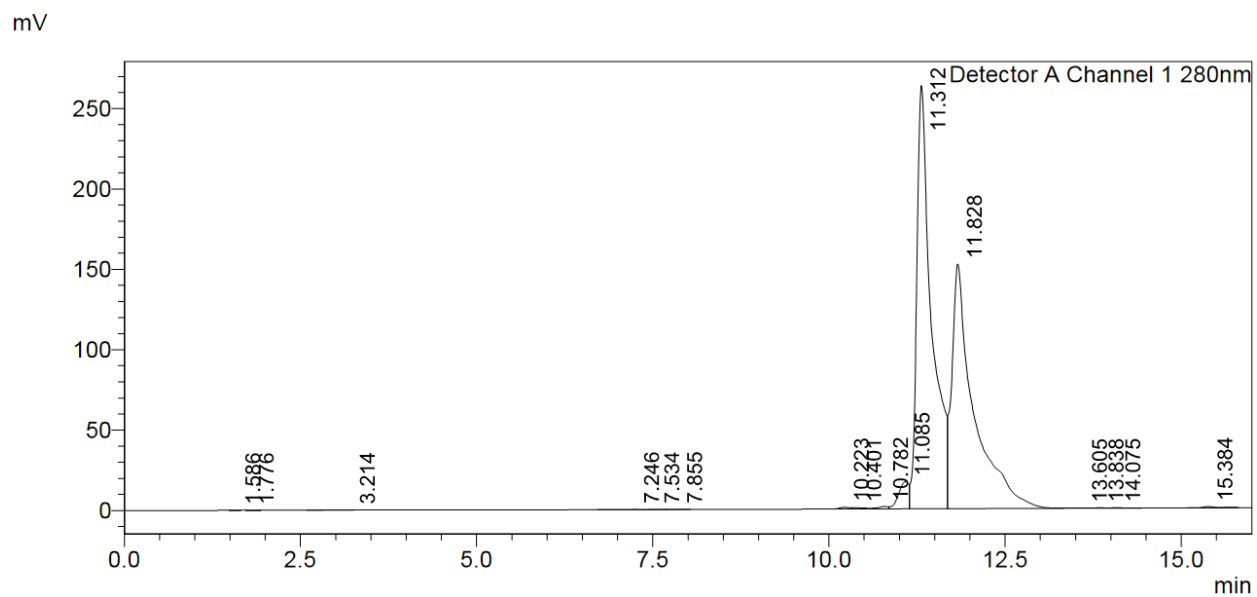

**Figure S51.** RP-HPLC trace showing the  $\alpha$ - and  $\beta$ -isomer products of **7** 11.3 and 11.8 min.

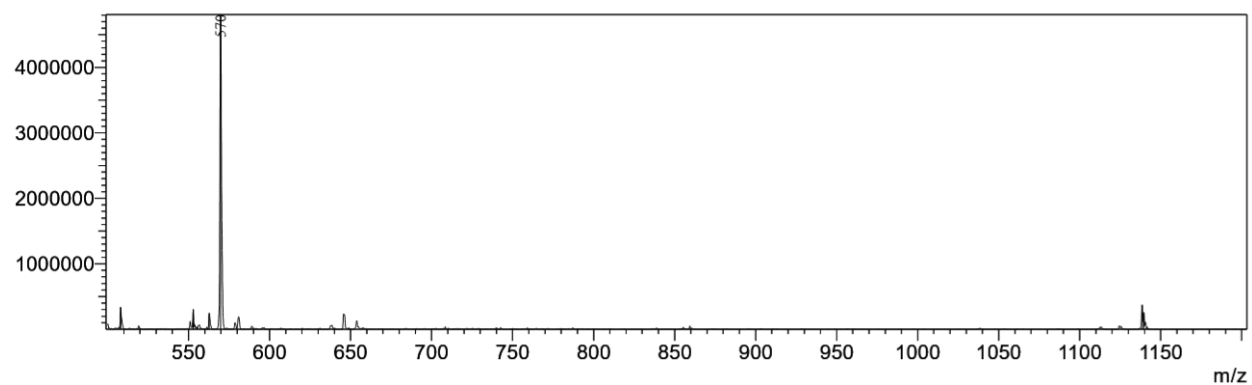

**Figure S52.** ESI-MS of **7**, expected  $m/z$  = 1157, observed  $m/z$  =  $[M^+ - H_2O]^{+1}$  1139,  $[M^+ - H_2O + H^+]^{+2}$  570  $m/z$ .

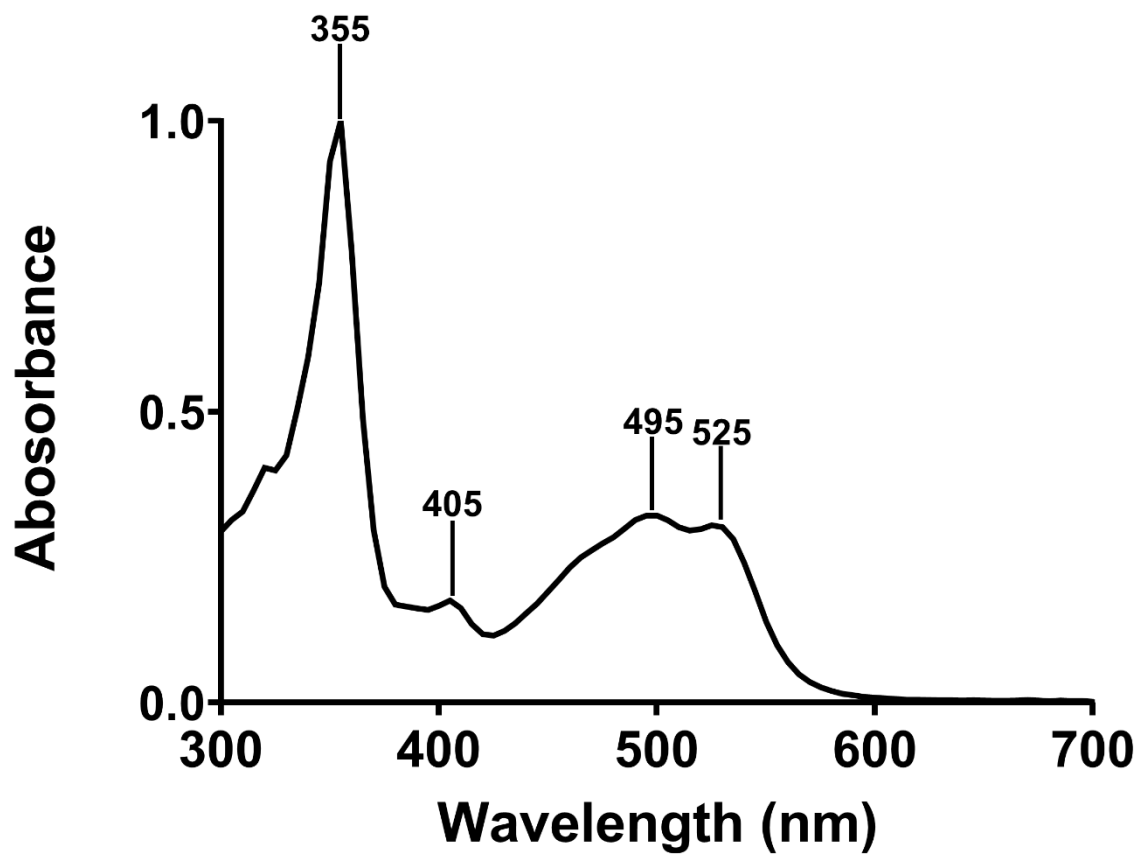

Figure S53. Electronic absorption spectra of 7 in water.

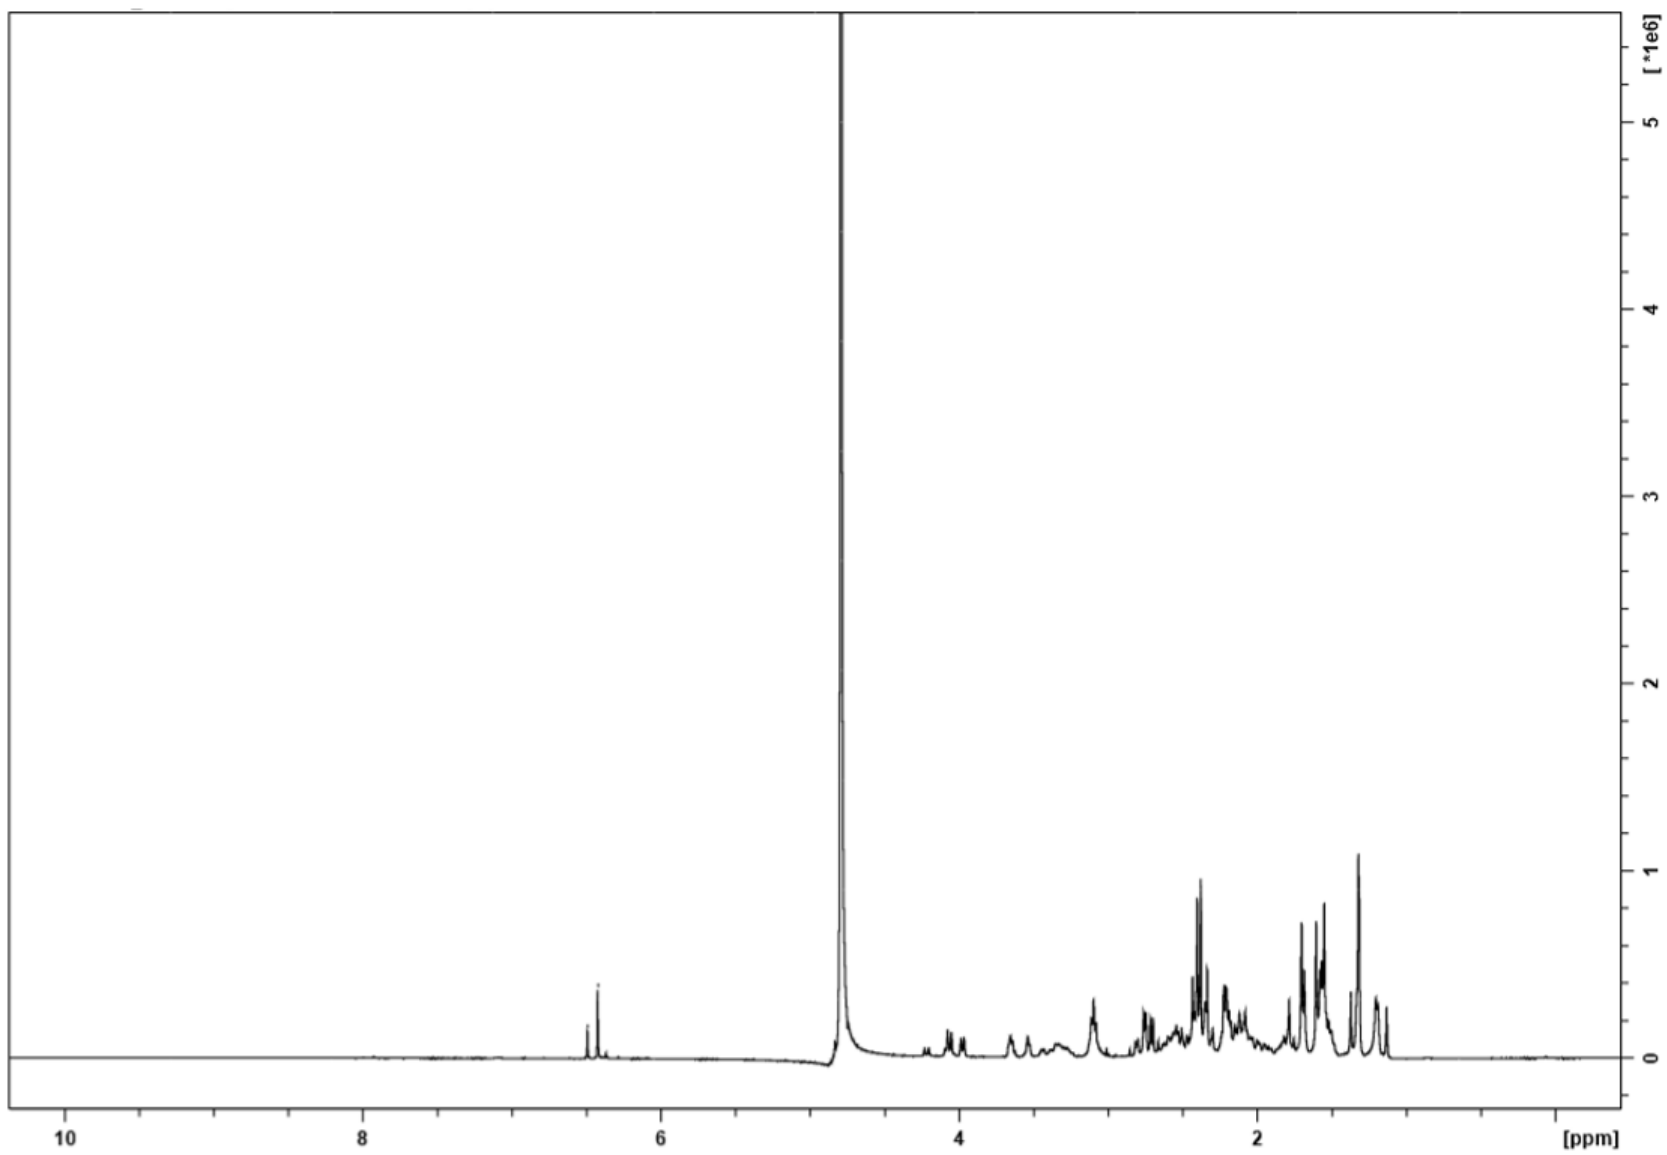

**Figure S54:**  $^1\text{H}$  NMR of **7** (400 MHz, 298K,  $\text{D}_2\text{O}$ ).

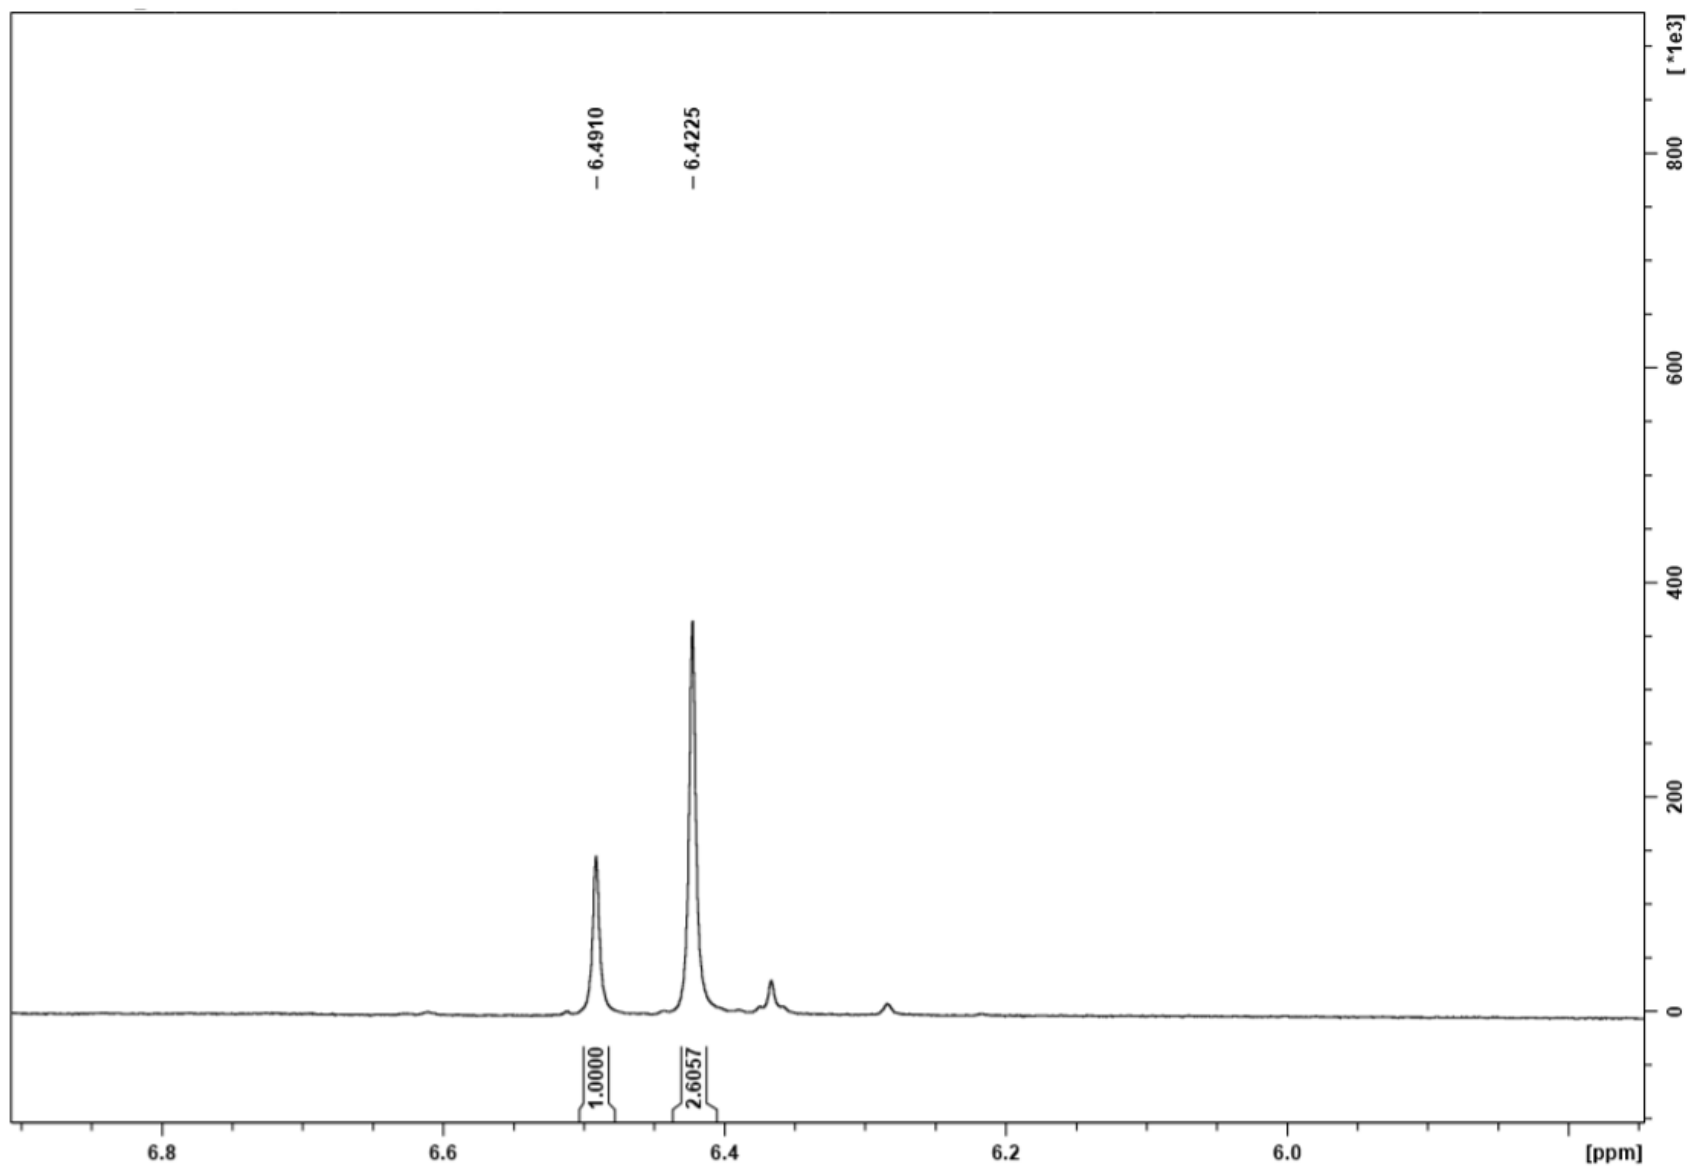

**Figure S55.** <sup>1</sup>H NMR of **7** (400 MHz, 298K, D<sub>2</sub>O) (Aromatic). Characteristic signals (H19) of β- (6.49) and α- (6.42) aquo-isomers of **7** are observed.

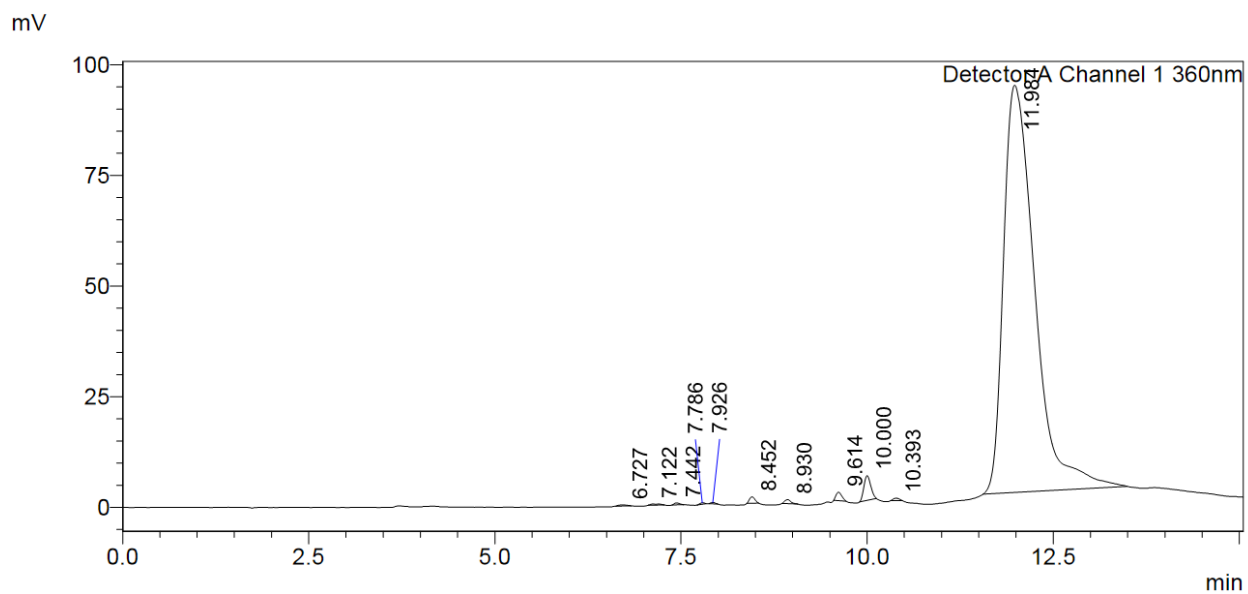

**Figure S56.** RP-HPLC trace showing product **15** at 12.0 min.

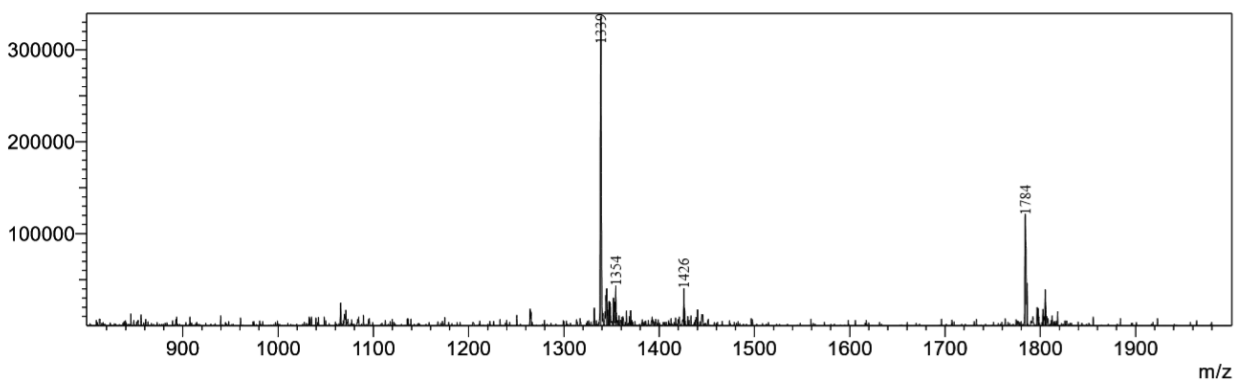

**Figure S57.** ESI-MS of **15**, expected  $m/z = 5369$ , observed  $m/z = [M^+ - H_2O + 2H^+]^{+3} 1784$ ,  $[M^+ - H_2O + 3H^+]^{+4} 1339$   $m/z$ .

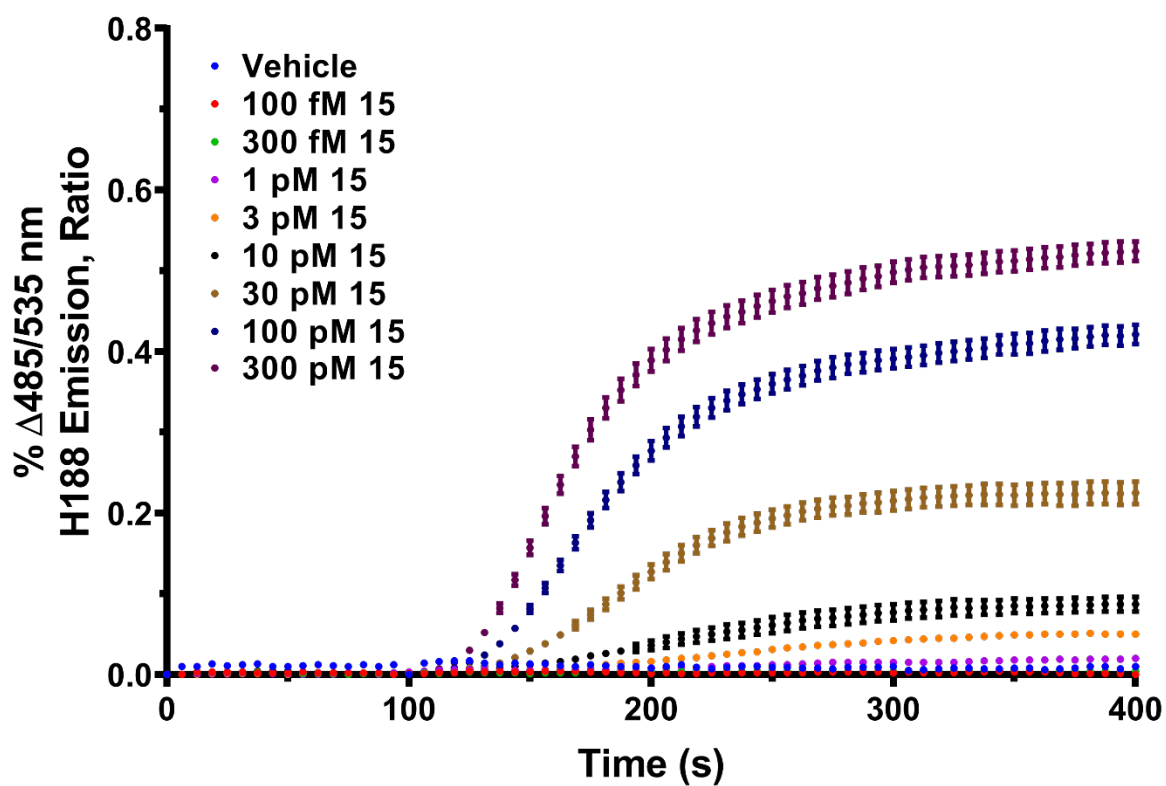

**Figure S58.** *In vitro* dose escalation study of **15** showing increase in cAMP levels in GLP-1R stably transfected HEK-293-H188 c20 cells.

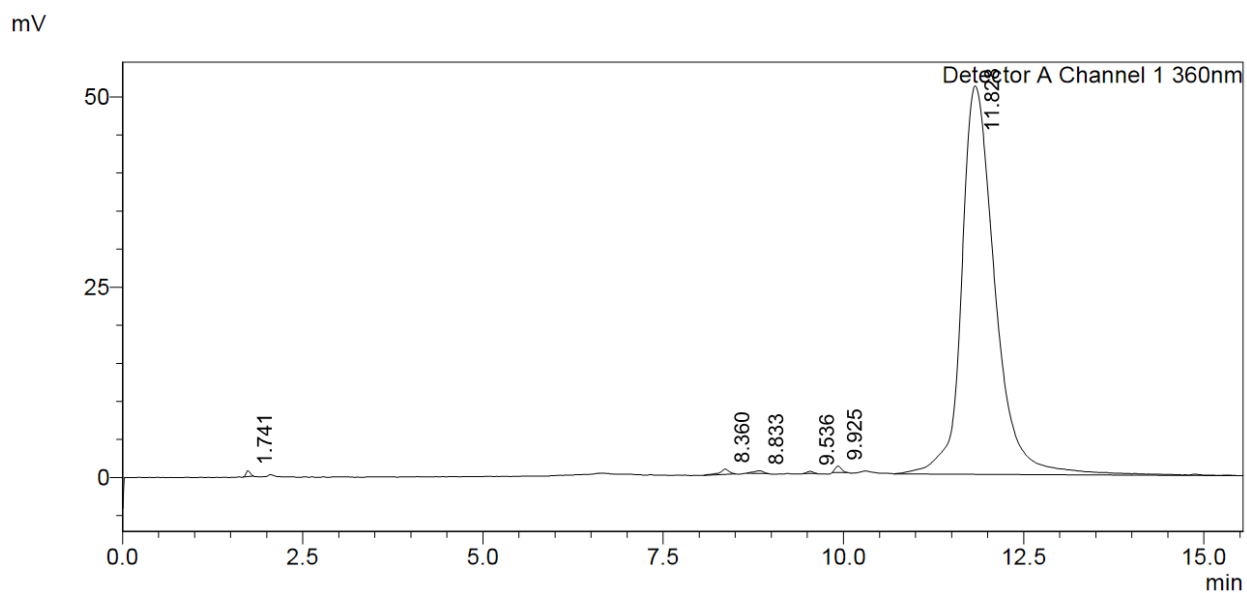

**Figure S59.** RP-HPLC trace showing product **23** at 11.8 min.

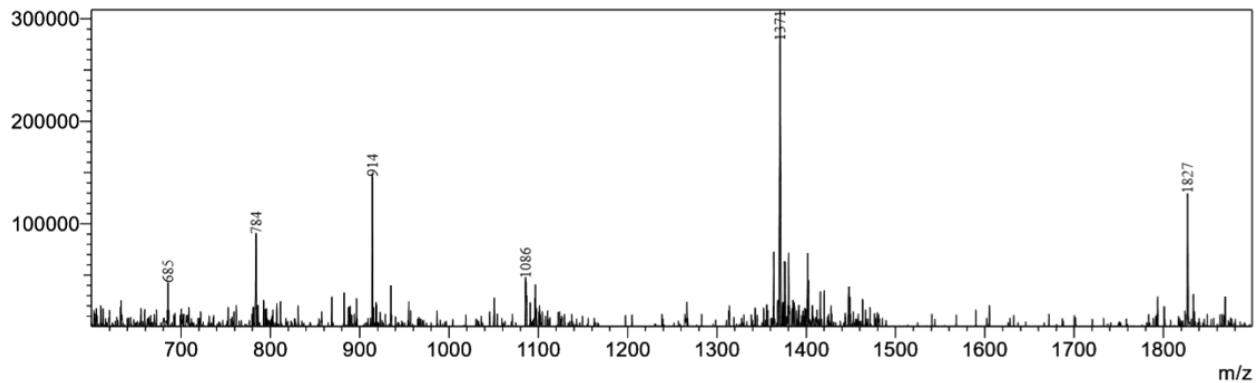

**Figure S60.** ESI-MS of **23**, expected  $m/z = 5497$ , observed  $m/z = [M^+ - H_2O + 2H^+]^{+3} 1827$ ,  $[M^+ - H_2O + 3H^+]^{+4} 1371$ ,  $[M^+ - H_2O + 5H^+]^{+6} 914$ ,  $[M^+ - H_2O + 6H^+]^{+7} 784$ ,  $[M^+ - H_2O + 7H^+]^{+8} 685$   $m/z$ .

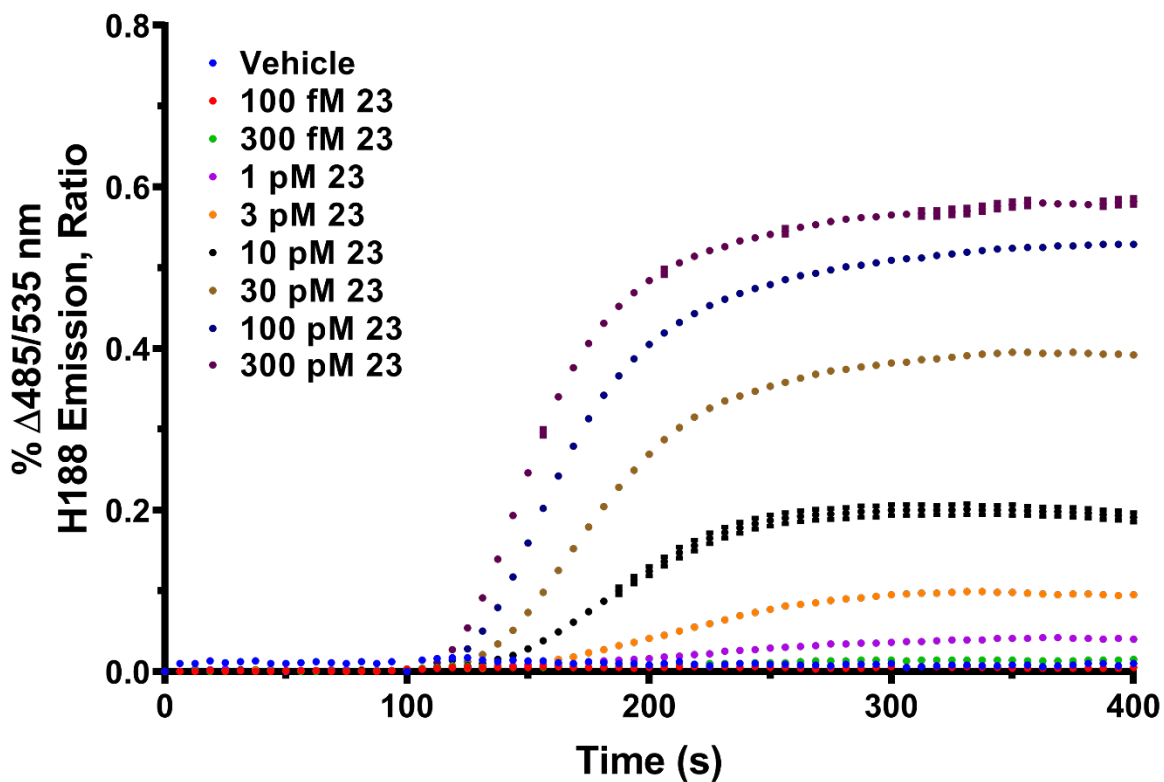

**Figure S61.** *In vitro* dose escalation study of **23** showing increase in cAMP levels in GLP-1R stably transfected HEK-293-H188 c20 cells.

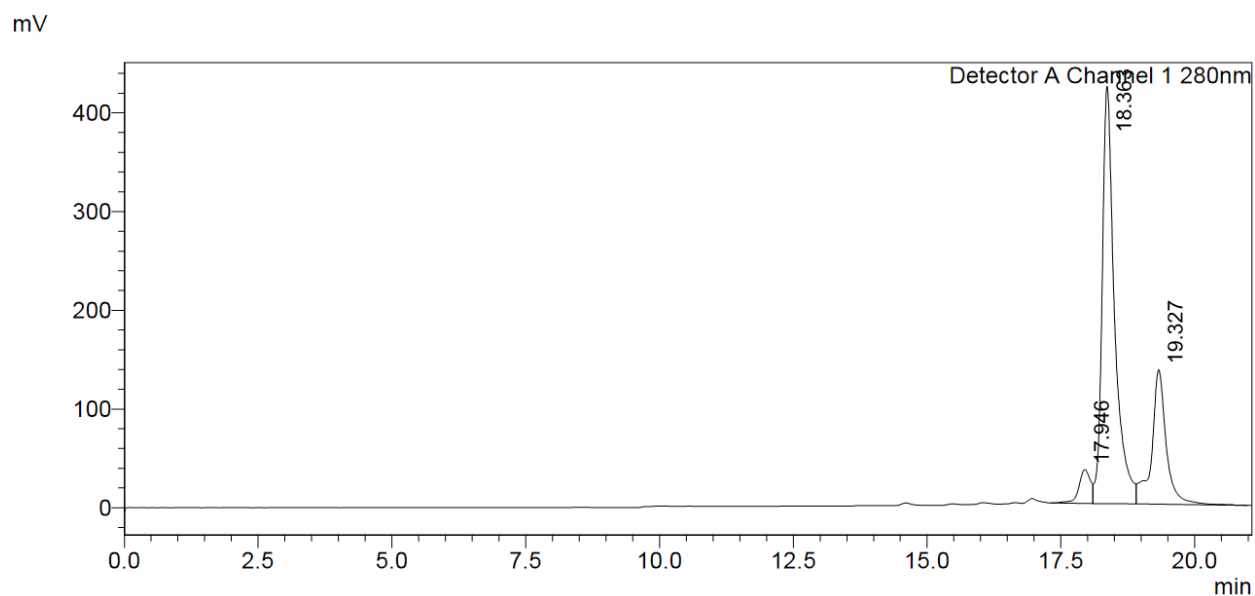

**Figure S62.** RP-HPLC trace showing the  $\alpha$ - and  $\beta$ -isomer products of **8** at 18.4 and 19.3 min.

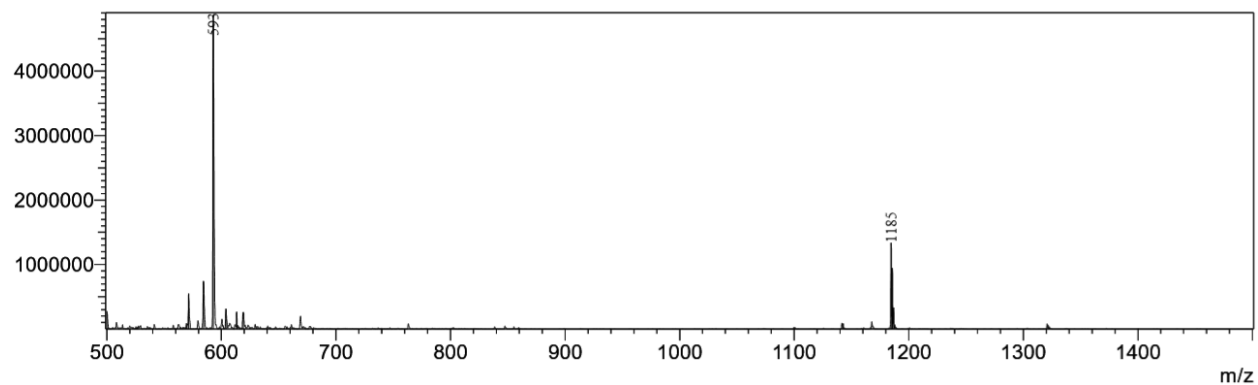

**Figure S63.** ESI-MS of **8**, expected  $m/z = 1204$ , observed  $m/z = [M^+ - H_2O]^{+1} 1185$ ,  $[M^+ - H_2O + H^+]^{+2} 593$   $m/z$ .



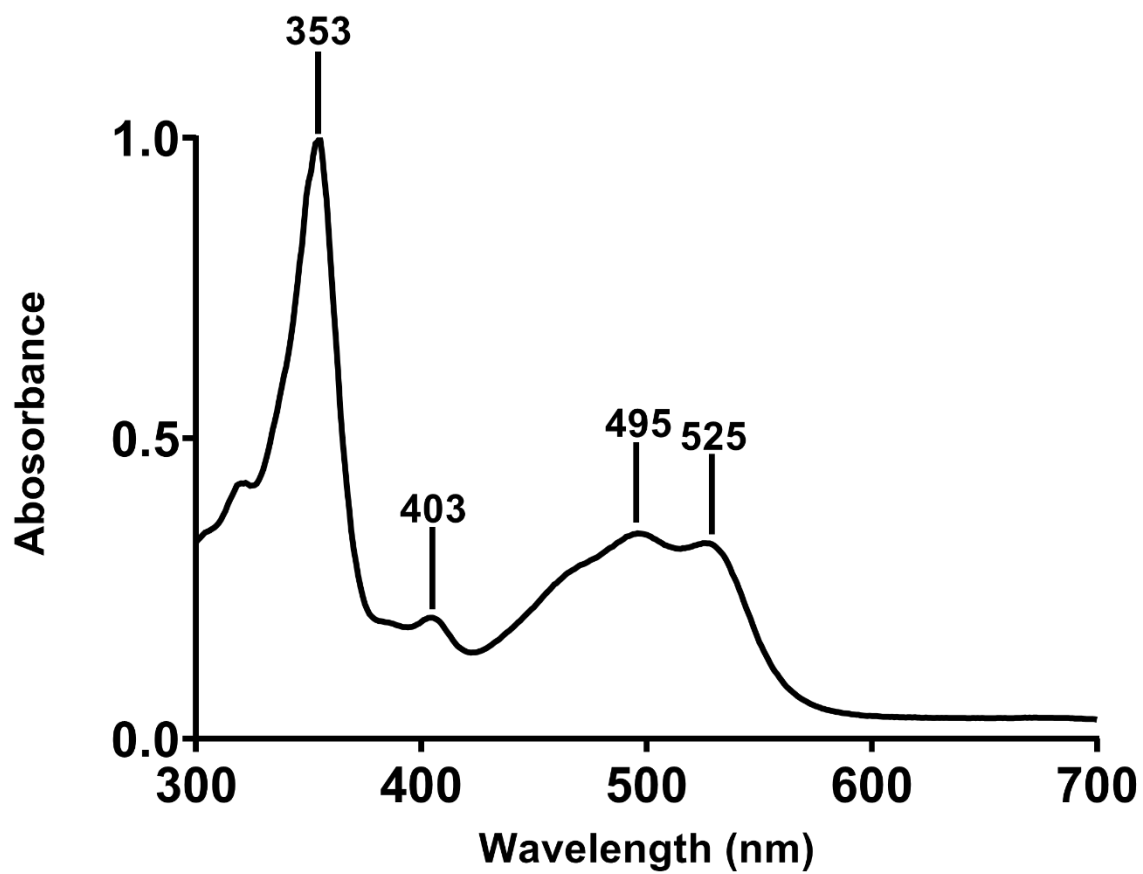

Figure S64. Electronic absorption spectra of 8 in water.

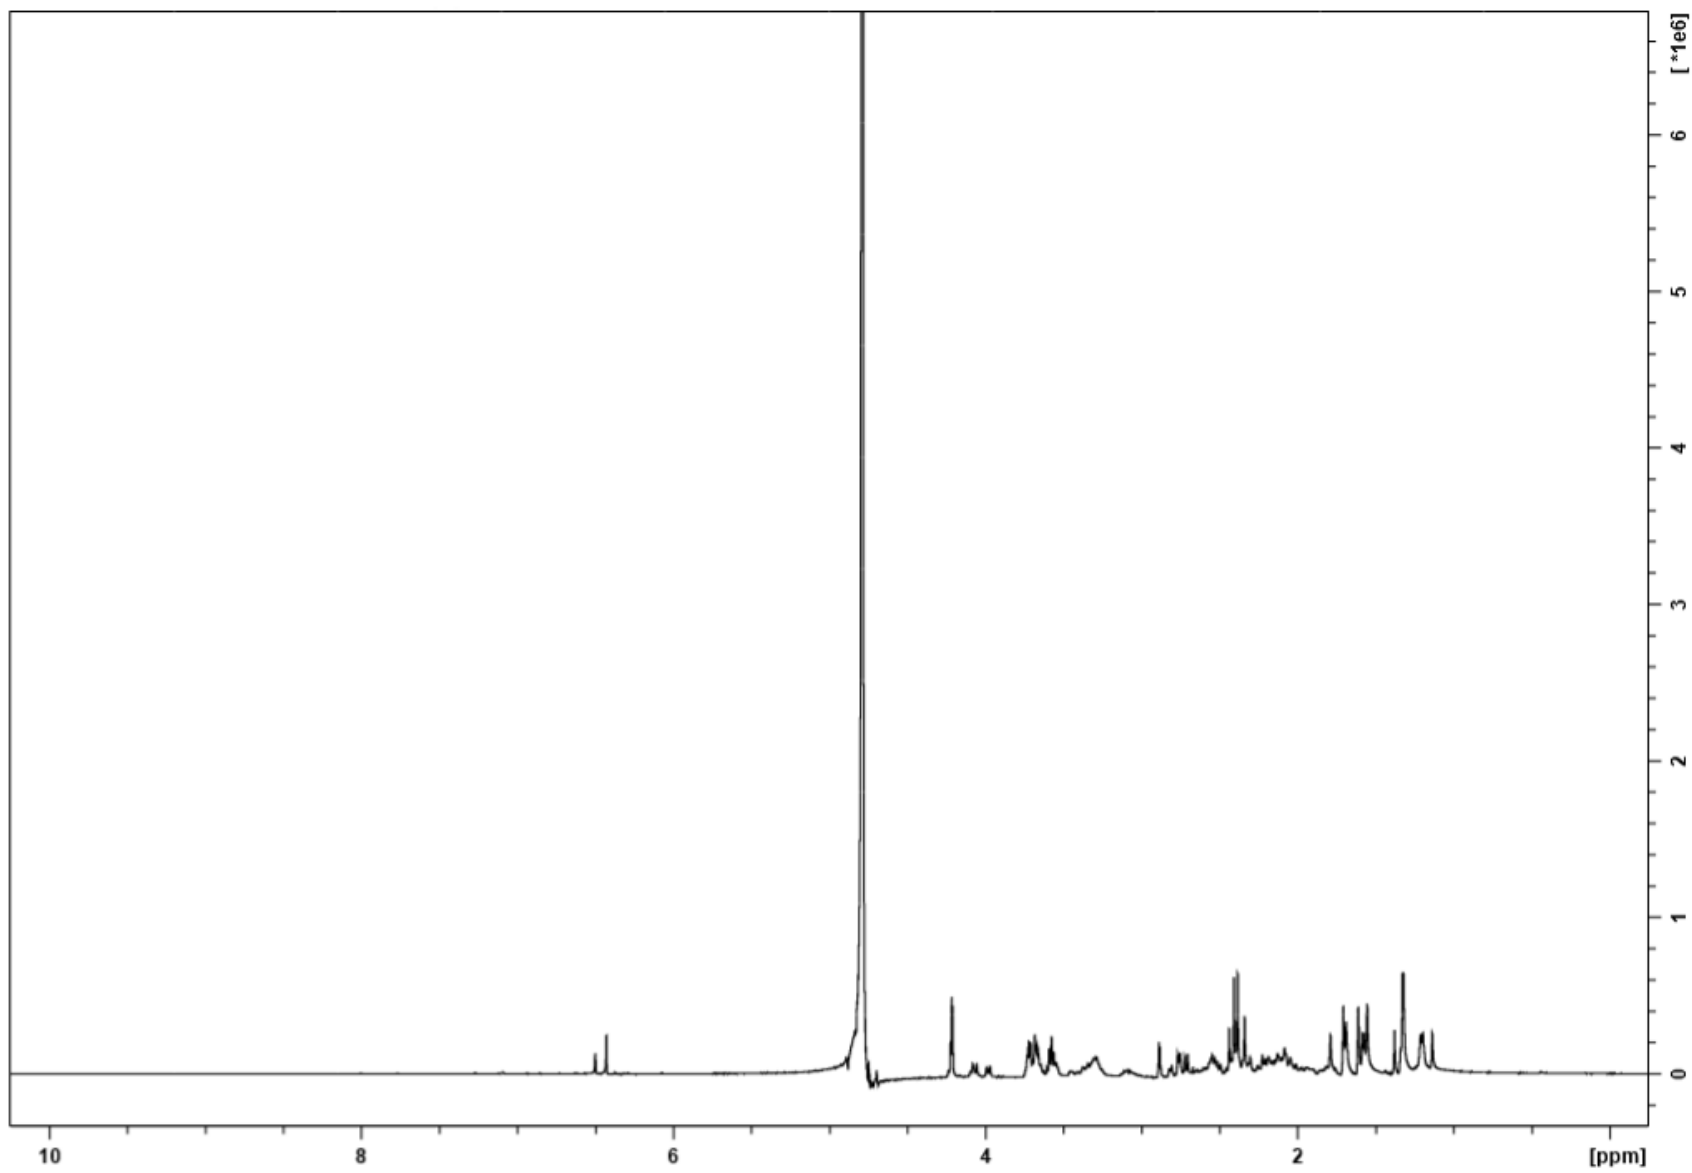

Figure S65.  $^1\text{H}$  NMR of **8** (400 MHz, 298K,  $\text{D}_2\text{O}$ ).

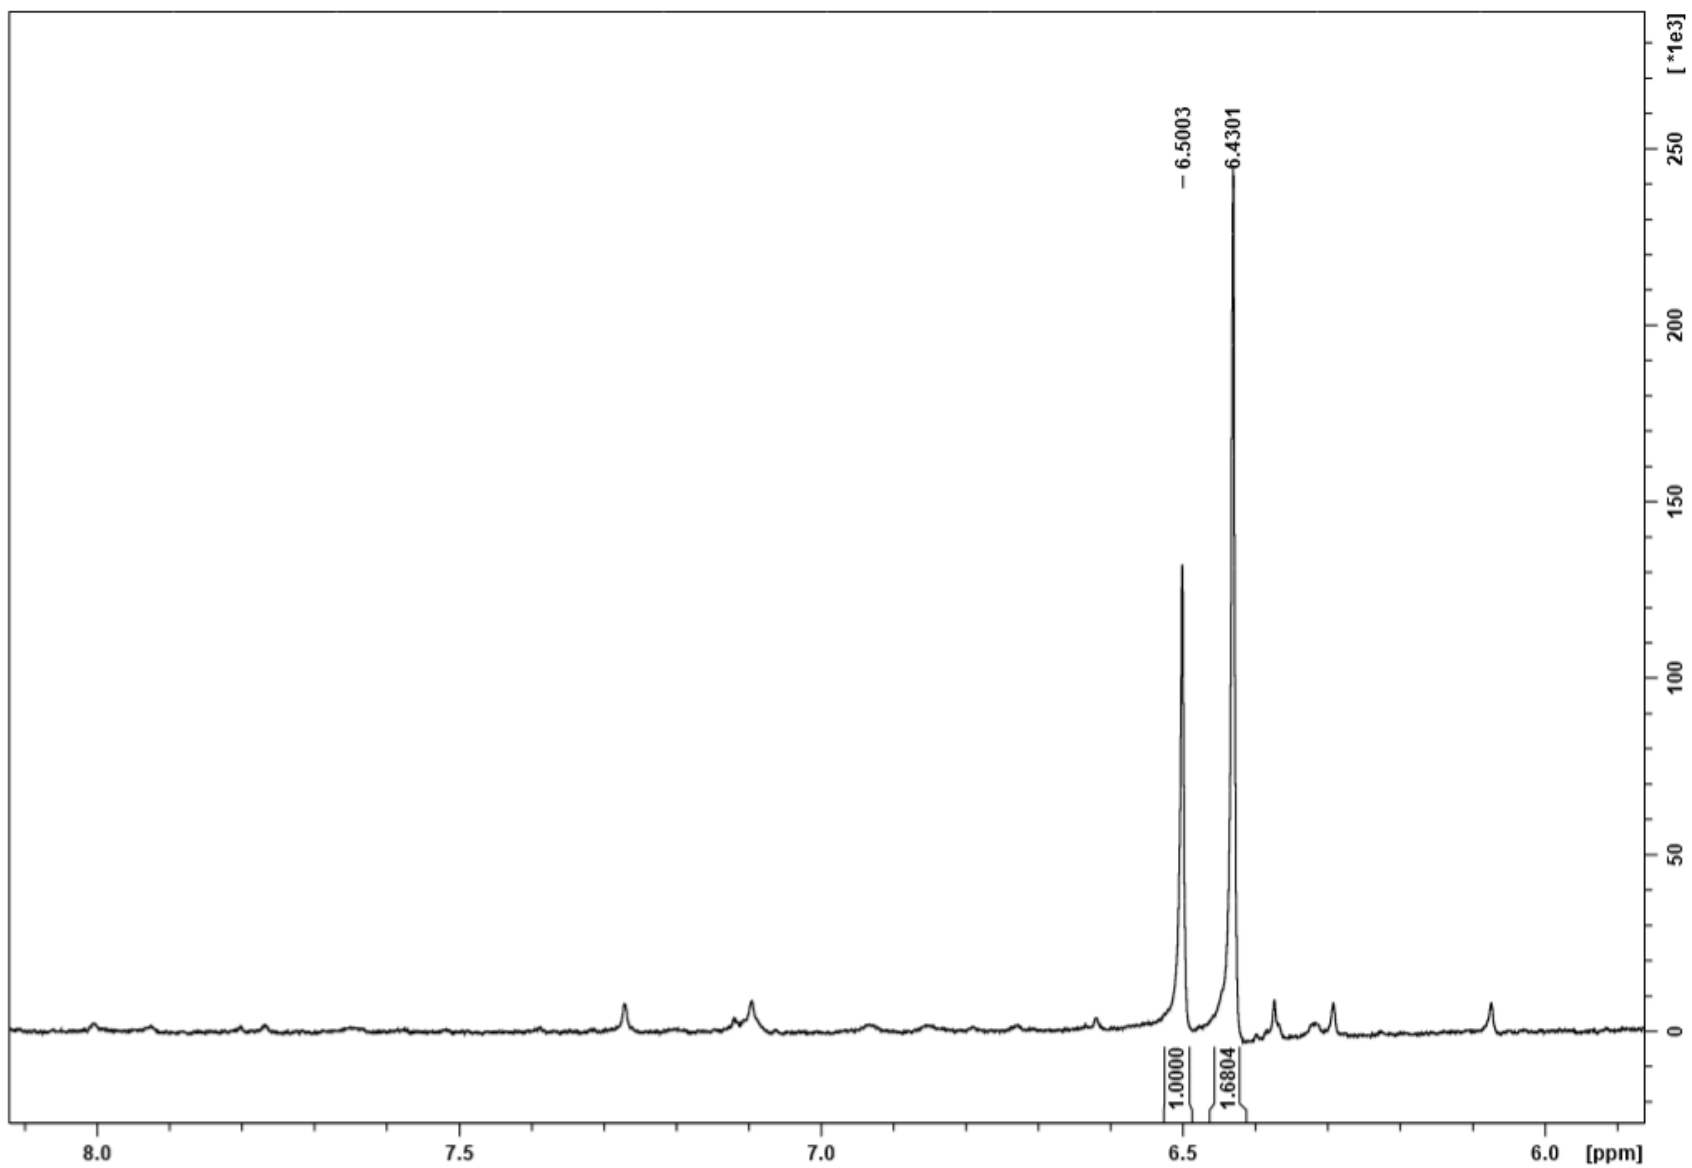

**Figure S66.**  $^1\text{H}$  NMR of **8** (400 MHz, 298K,  $\text{D}_2\text{O}$ ) (Aromatic). Characteristic signals (H19) of  $\beta$ - (6.50) and  $\alpha$ - (6.43) aquo-isomers of **8** are observed.

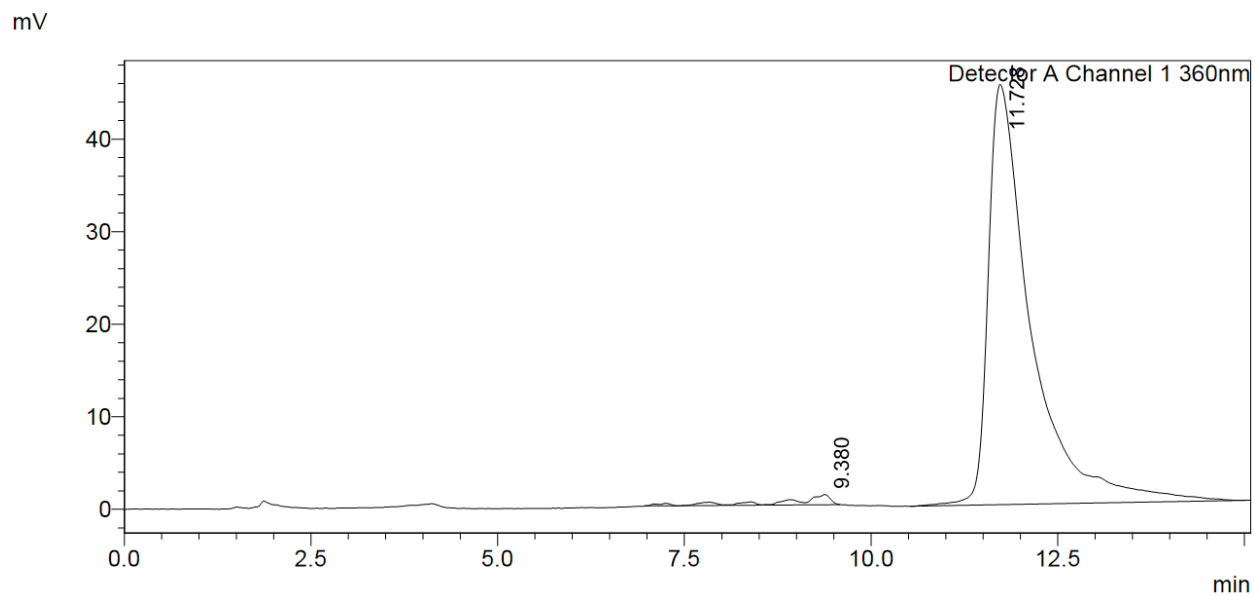

**Figure S67.** RP-HPLC trace showing product **16** at 11.7 min.

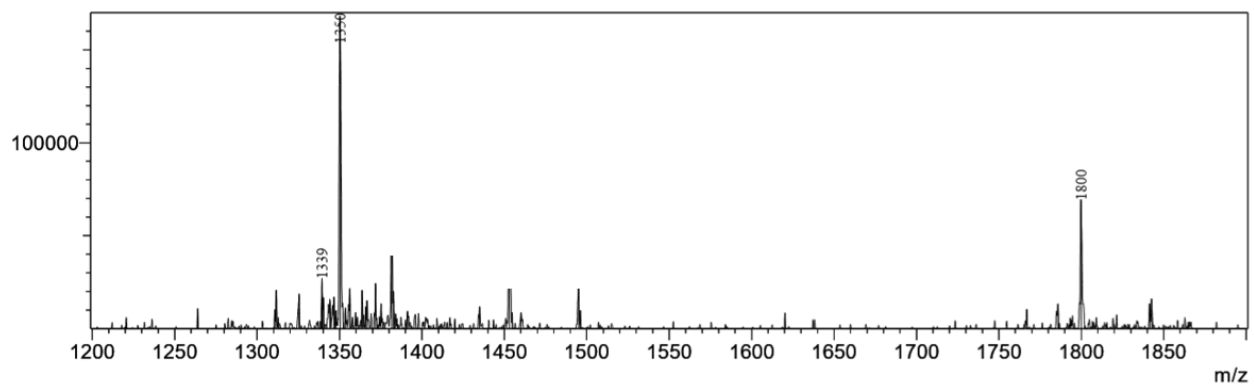

**Figure S68.** ESI-MS of **16**, expected  $m/z = 5416$ , observed  $m/z = [M^+ - H_2O + 2H^+]^{+3} 1800$ ,  $[M^+ - H_2O + 3H^+]^{+4} 1350$  m/z.

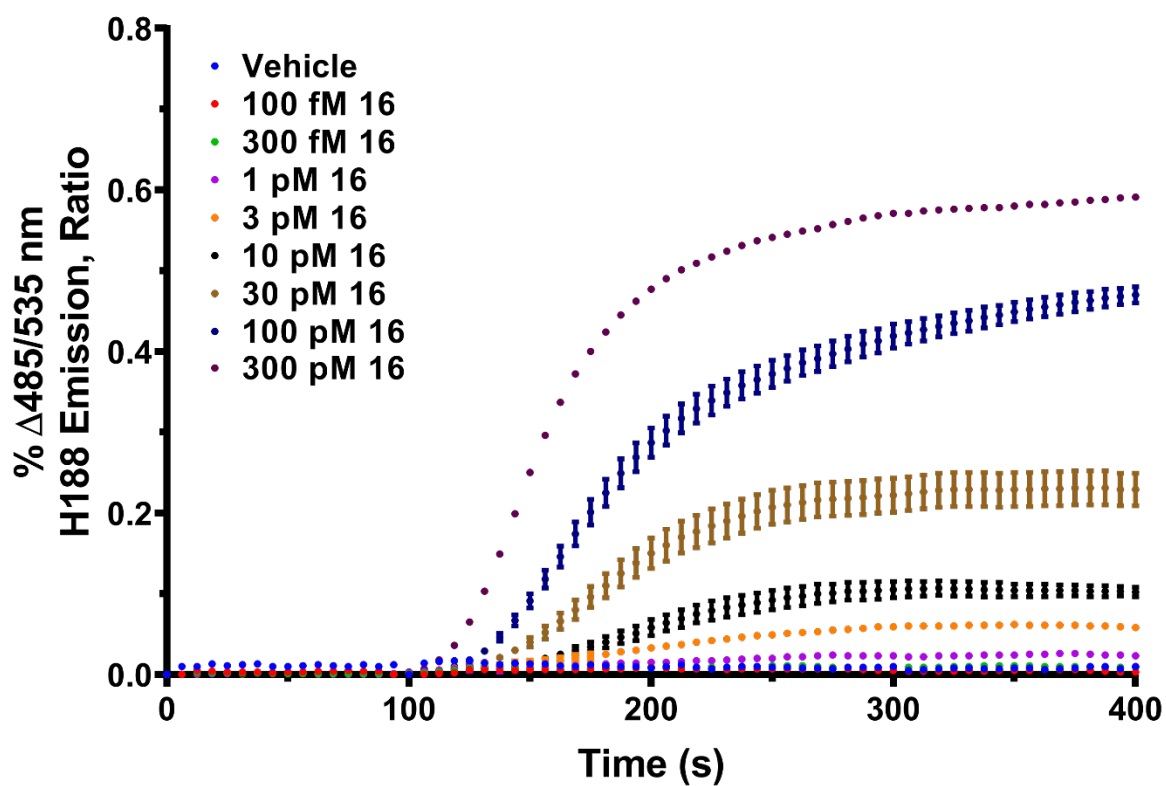

**Figure S69.** *In vitro* dose escalation study of **16** showing increase in cAMP levels in GLP-1R stably transfected HEK-293-H188 c20 cells.

mV

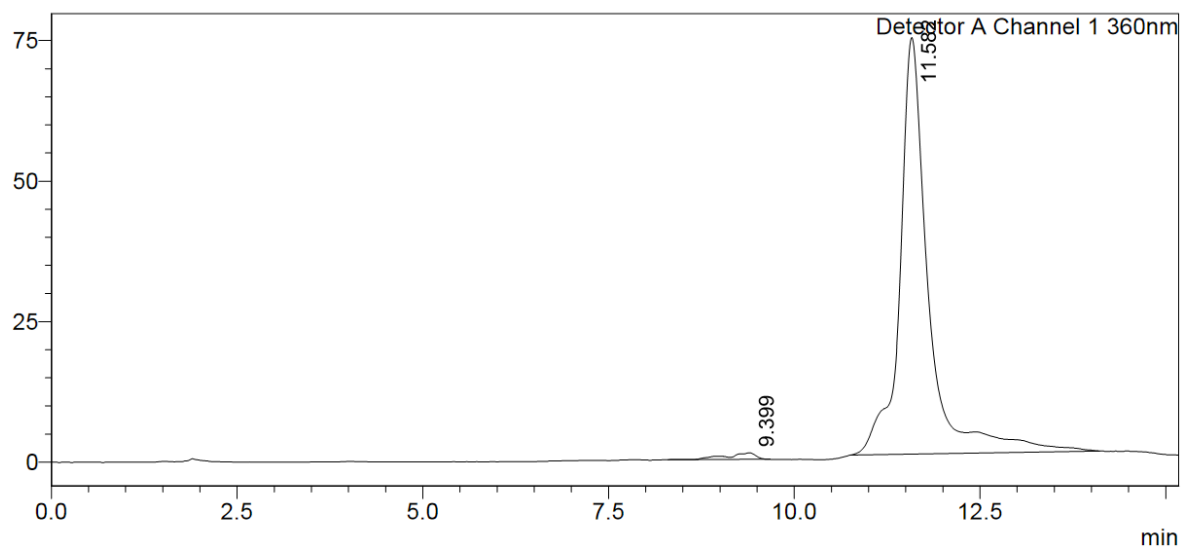

**Figure S70.** RP-HPLC trace showing product **24** at 11.6 min.

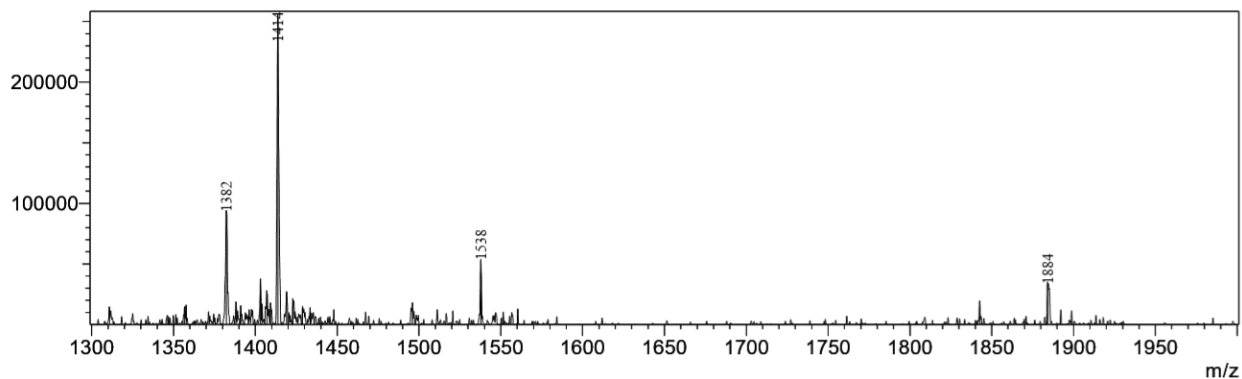

**Figure S71.** ESI-MS of **24**, expected  $m/z = 5544$ , observed  $m/z = [M^+ - H_2O + 2H^+ + CH_3CN]^{+3} 1884$ ,  $[M^+ - H_2O + 3H^+ + CH_3OH]^{+4} 1414$ ,  $[M^+ - H_2O + 3H^+]^{+4} 1382$   $m/z$ .

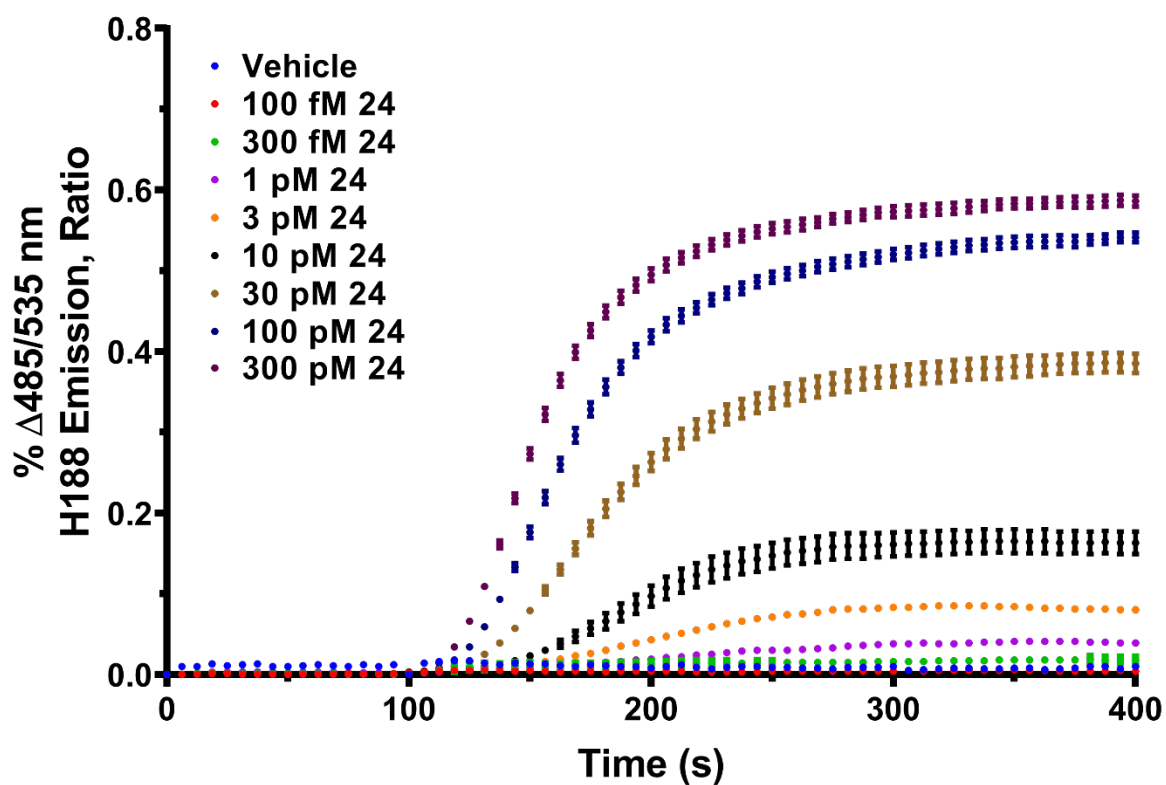

**Figure S72.** *In vitro* dose escalation study of **24** showing increase in cAMP levels in GLP-1R stably transfected HEK-293-H188 c20 cells.

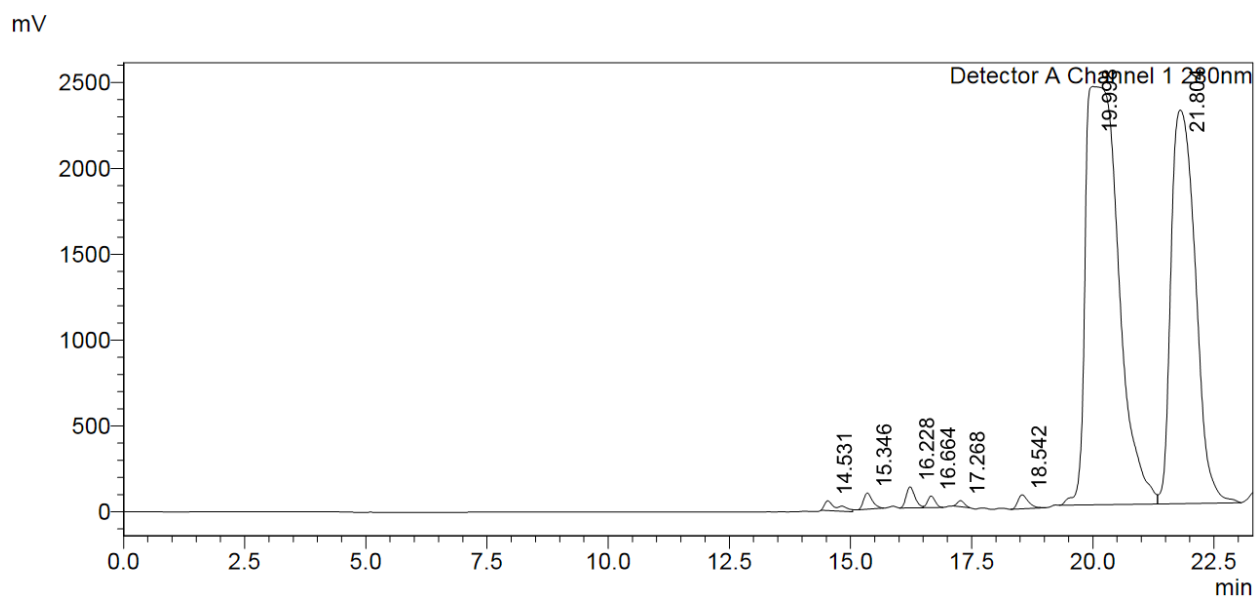

**Figure S73.** RP-HPLC trace showing the  $\alpha$ - and  $\beta$ -isomer products of **9** at 20.0 and 21.8 min.

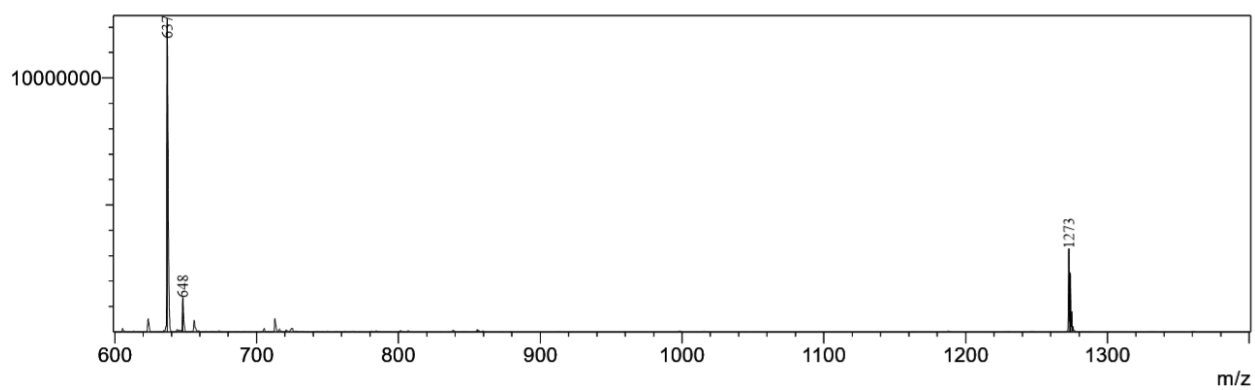

**Figure S74.** ESI-MS of **9**, expected  $m/z = 1292$ , observed  $m/z = [M^+ - H_2O]^{+1} 1273$ ,  $[M^+ - H_2O + H^+]^{+2} 637$   $m/z$ .

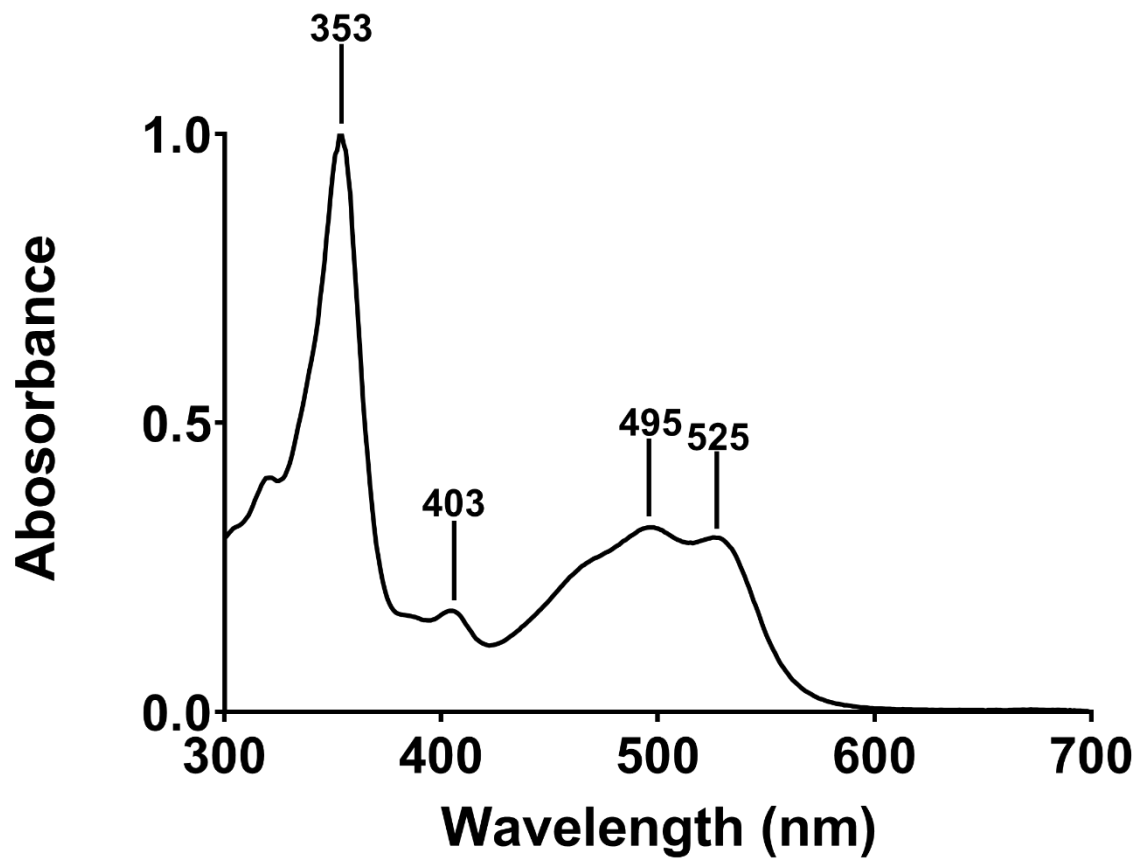

Figure S75. Electronic absorption spectra of 9 in water.



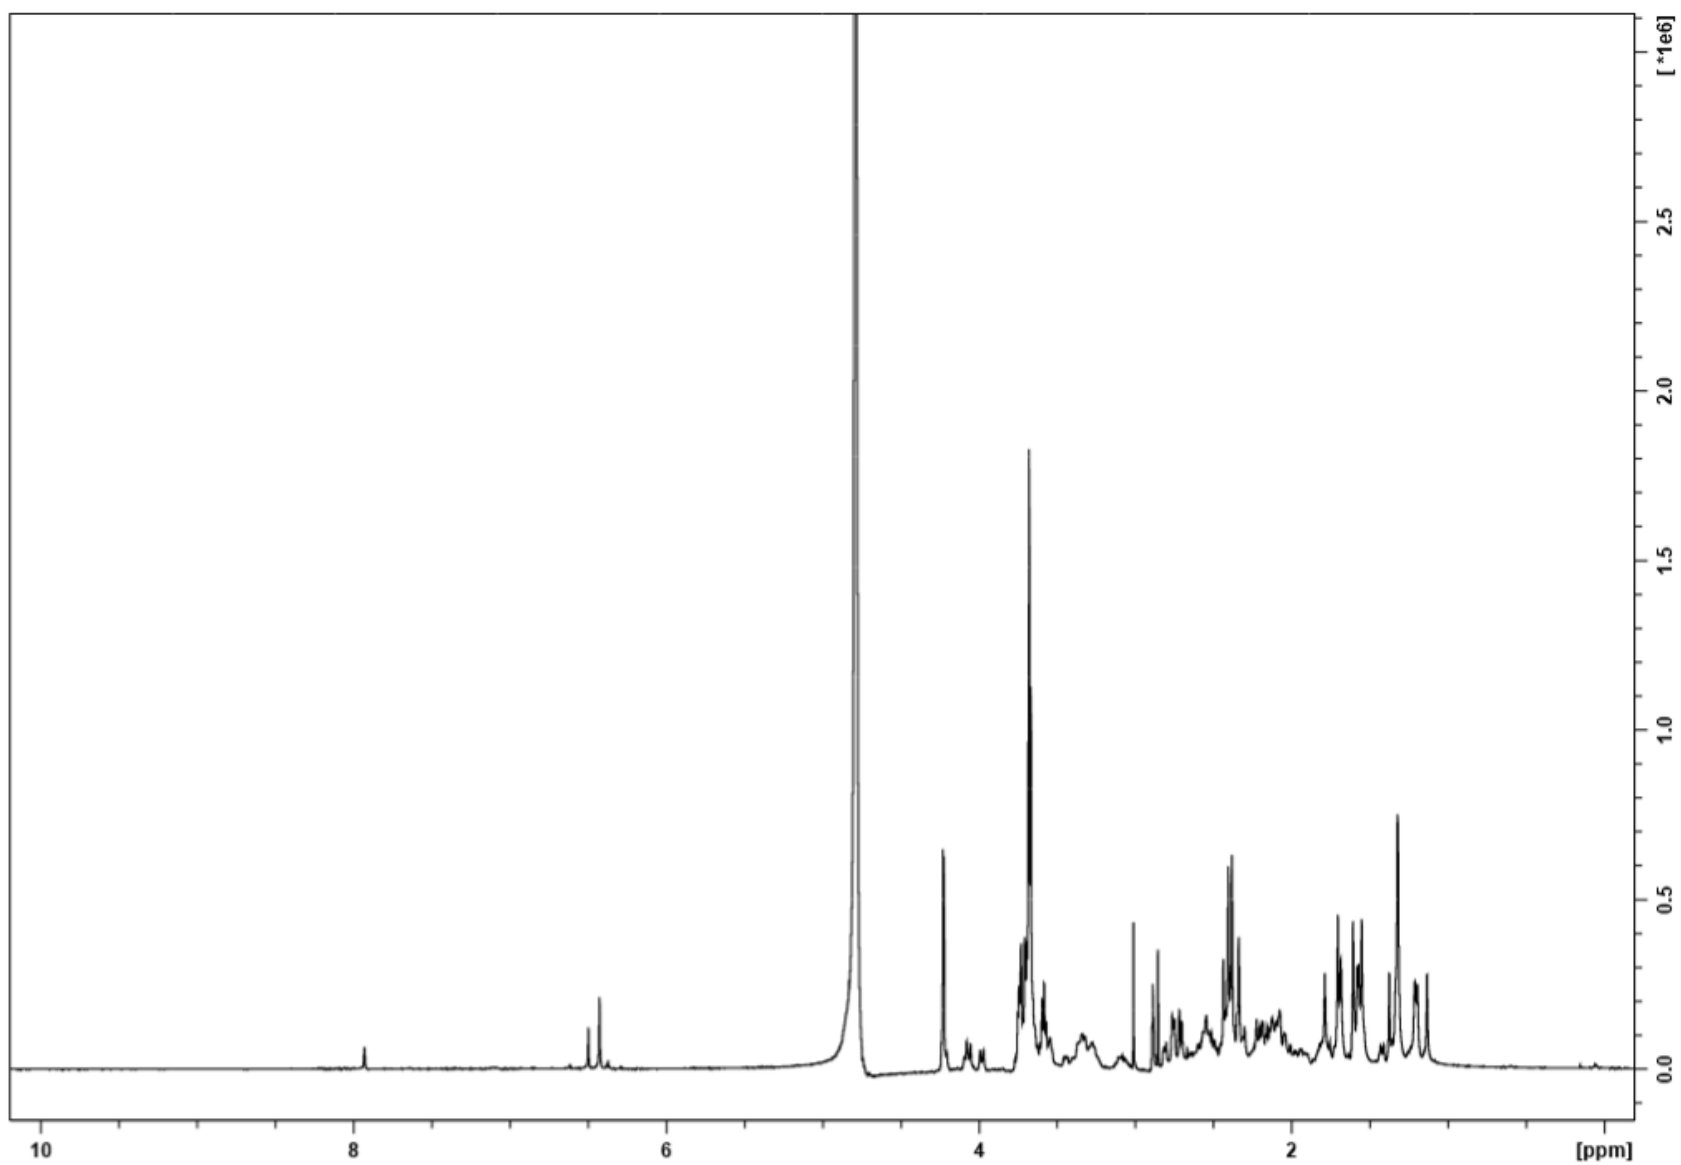

Figure S76.  $^1\text{H}$  NMR of **9** (400 MHz, 298K,  $\text{D}_2\text{O}$ ).

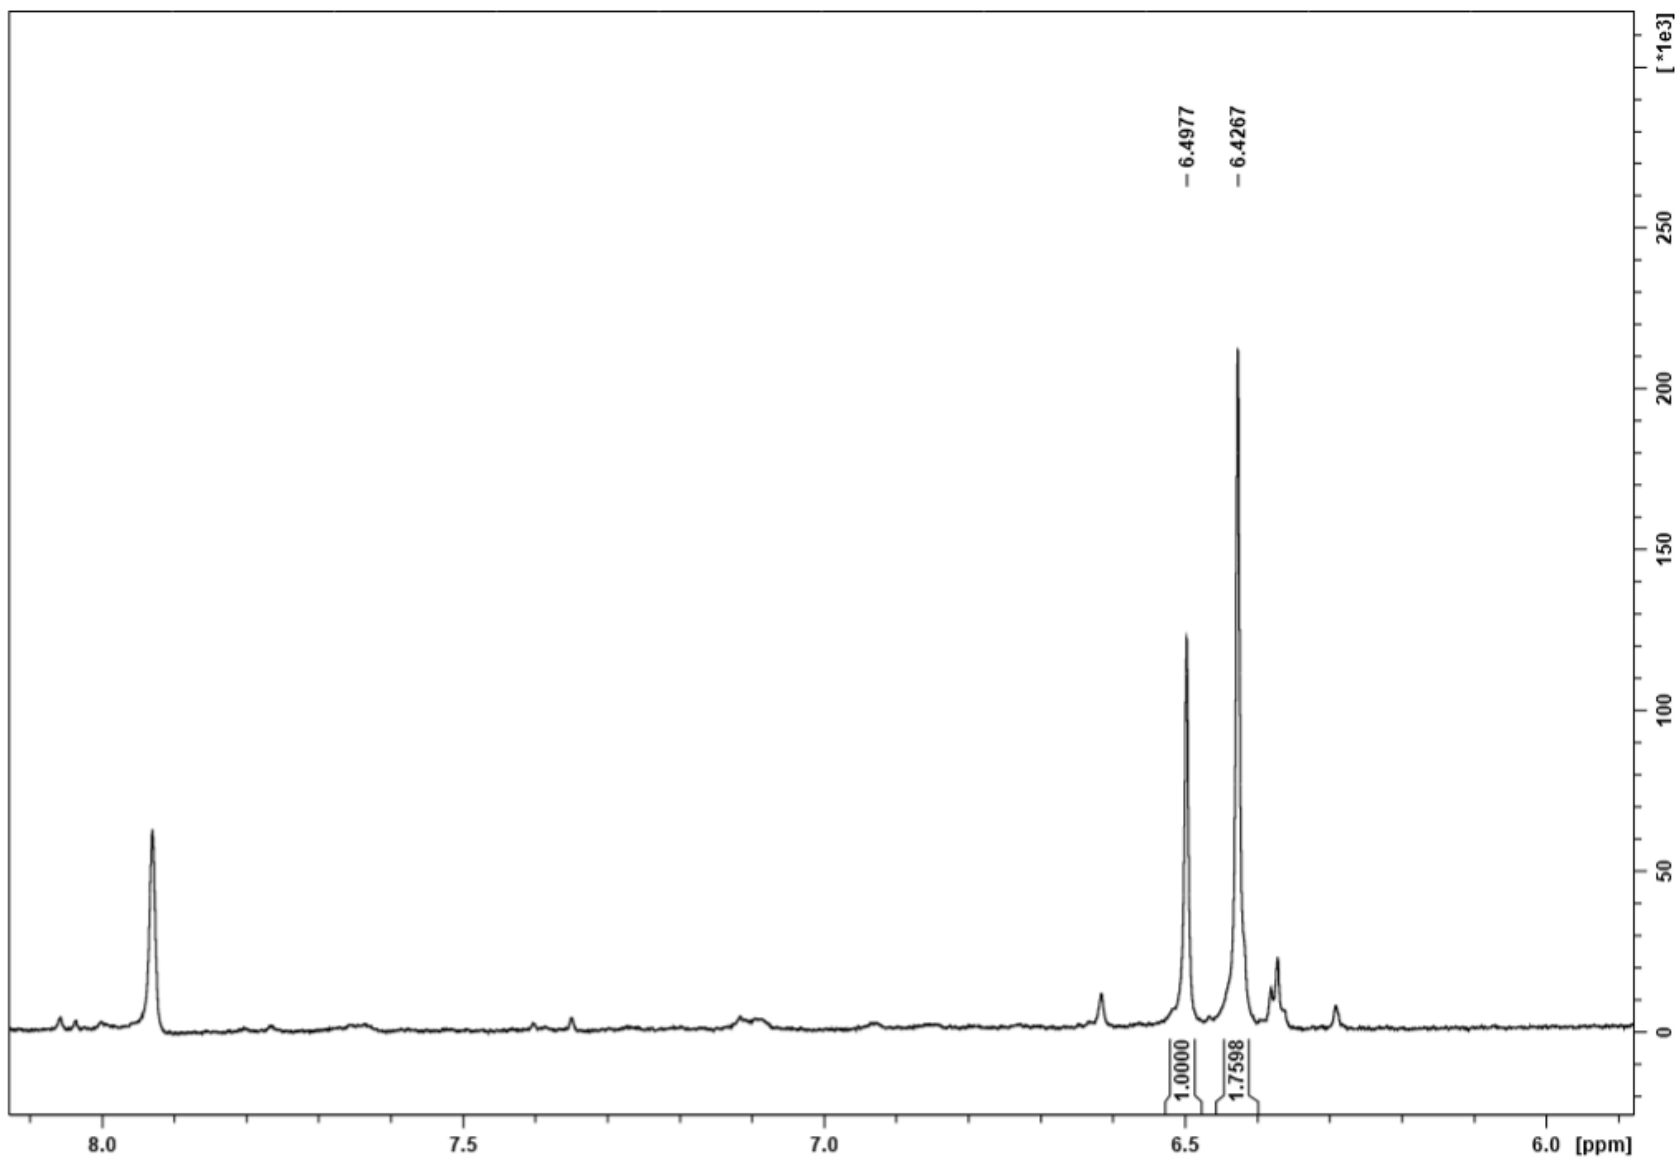

**Figure S77.**  $^1\text{H}$  NMR of **9** (400 MHz, 298K,  $\text{D}_2\text{O}$ ) (Aromatic). Characteristic signals (H19) of  $\beta$ - (6.50) and  $\alpha$ - (6.43) aquo-isomers of **9** are observed.

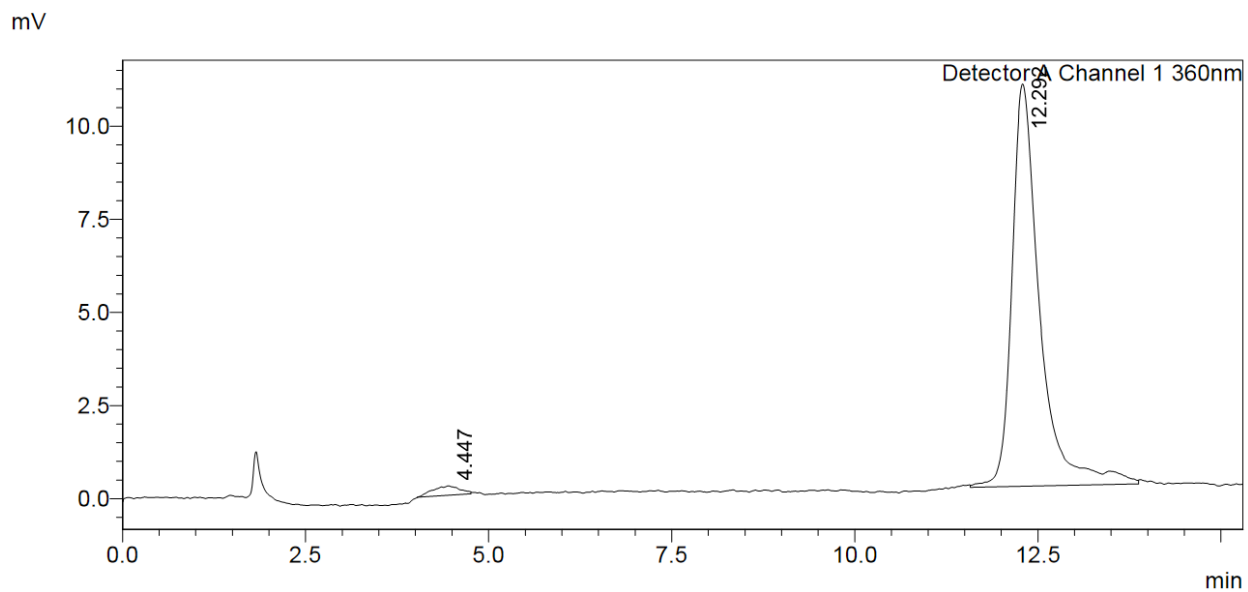

**Figure S78.** RP-HPLC trace showing product **17** at 12.3 min.

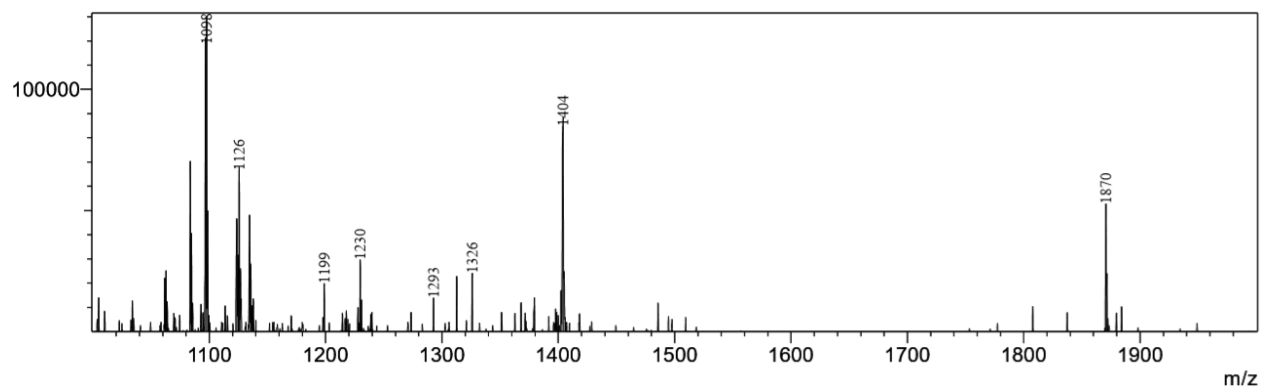

**Figure S79.** ESI-MS of **17**, expected  $m/z = 5504$ , observed  $m/z = [M^+ - H_2O + 2H^+ + CH_3CN]^+ 1870$ ,  $[M^+ - H_2O + 3H^+ + CH_3OH]^+ 1404$ ,  $[M^+ - H_2O + 4H^+]^+ 1098$  m/z.

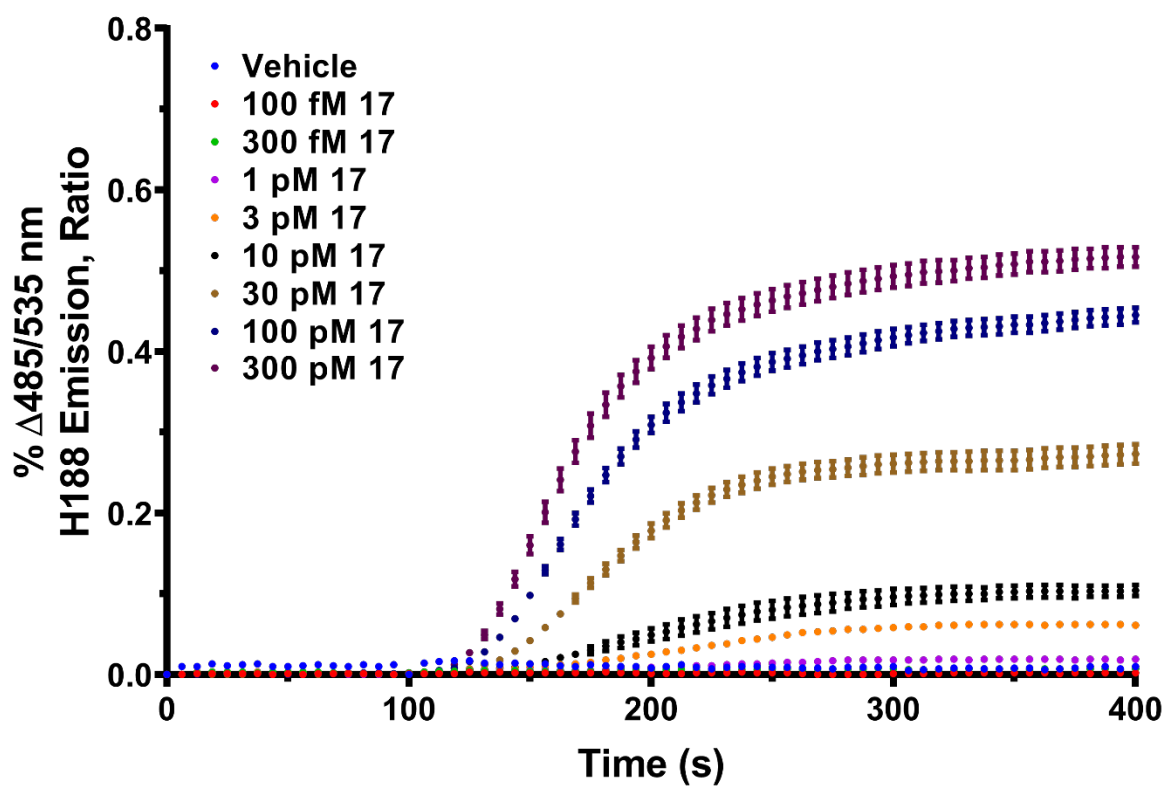

**Figure S80.** *In vitro* dose escalation study of **17** showing increase in cAMP levels in GLP-1R stably transfected HEK-293-H188 c20 cells.

mV

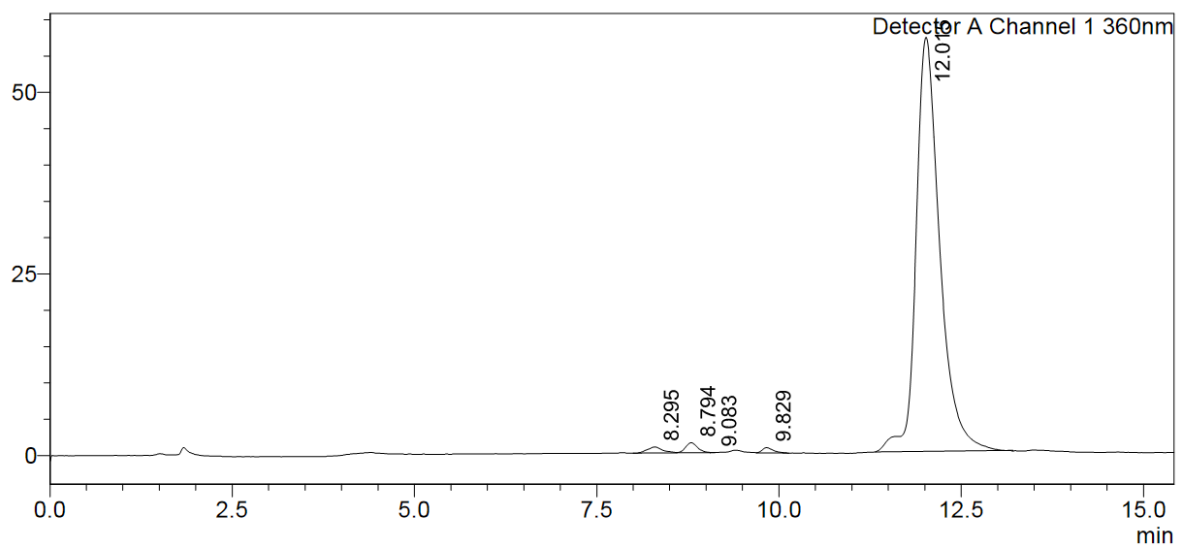

**Figure S81.** RP-HPLC trace showing product **25** at 12.0 min.

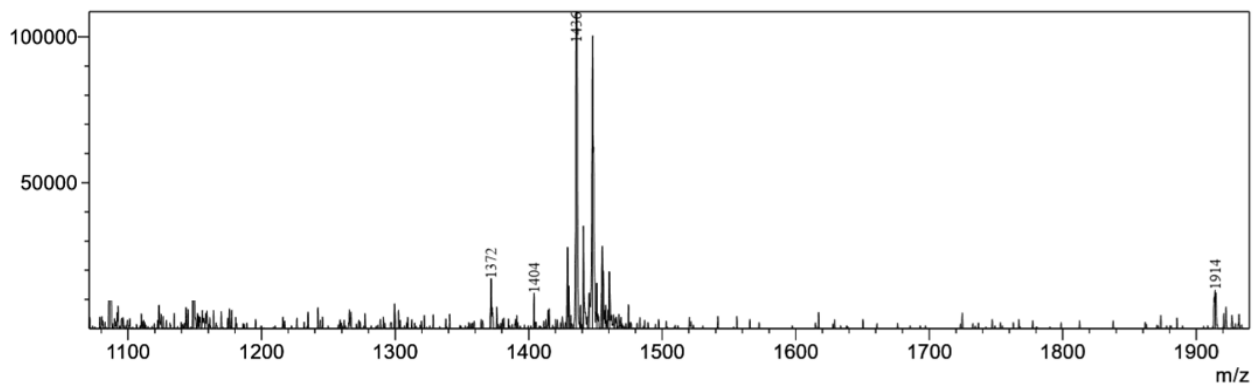

**Figure S82.** ESI-MS of **25**, expected  $m/z = 5632$ , observed  $m/z = [M^+ - H_2O + 2H^+ + CH_3CN]^{+3} 1914$ ,  $[M^+ - H_2O + 3H^+ + CH_3OH]^{+4} 1436$   $m/z$ .

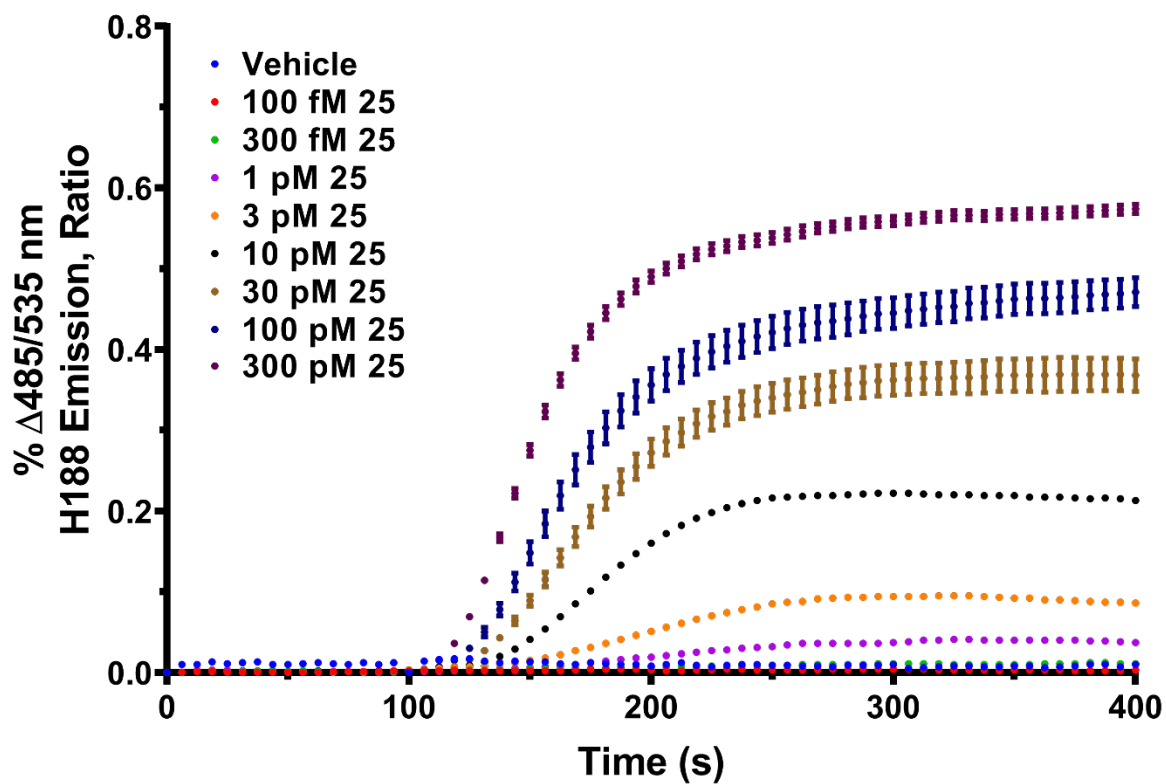

**Figure S83.** *In vitro* dose escalation study of **25** showing increase in cAMP levels in GLP-1R stably transfected HEK-293-H188 c20 cells.

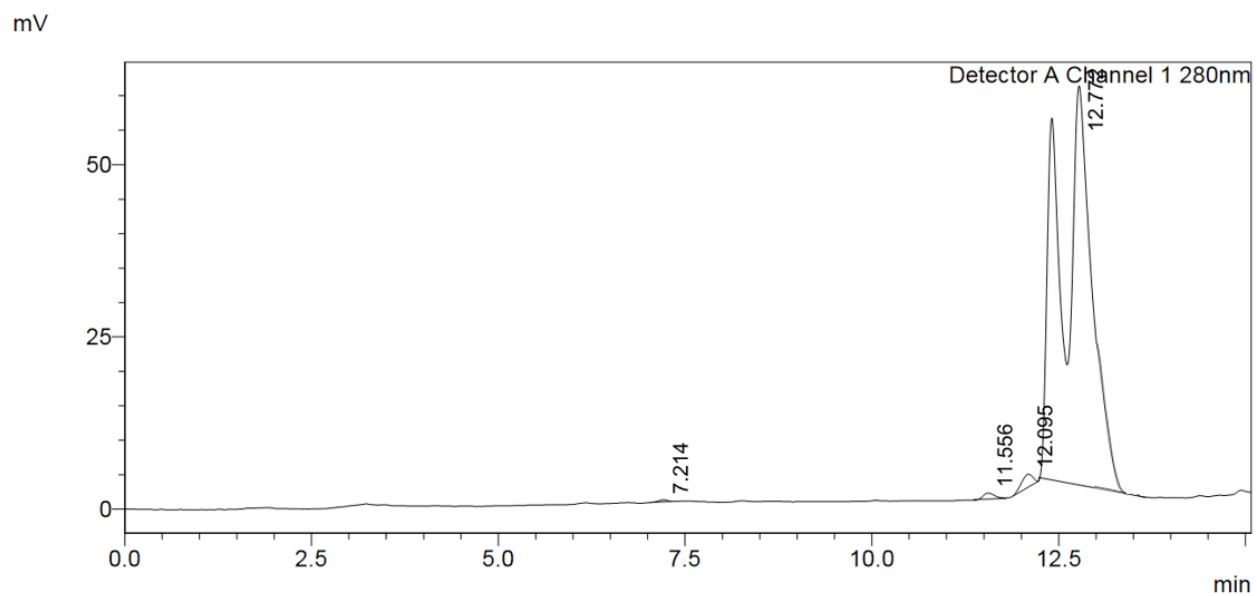

**Figure S84.** RP-HPLC trace showing the  $\alpha$ - and  $\beta$ - isomer products of **10** at 12.4 and 12.8 min.

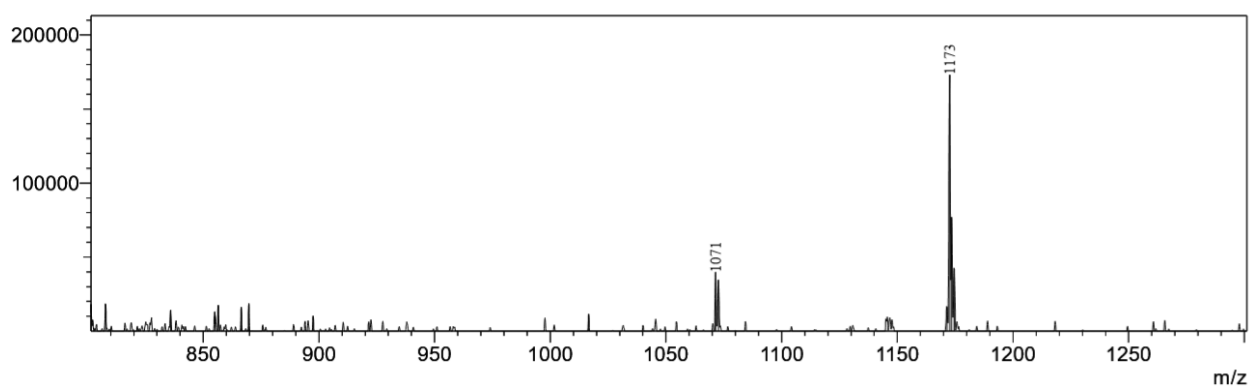

**Figure S85.** ESI-MS of **10**, expected  $m/z = 1191$ , observed  $m/z = [M^+ - H_2O]^{+1} 1173$ .

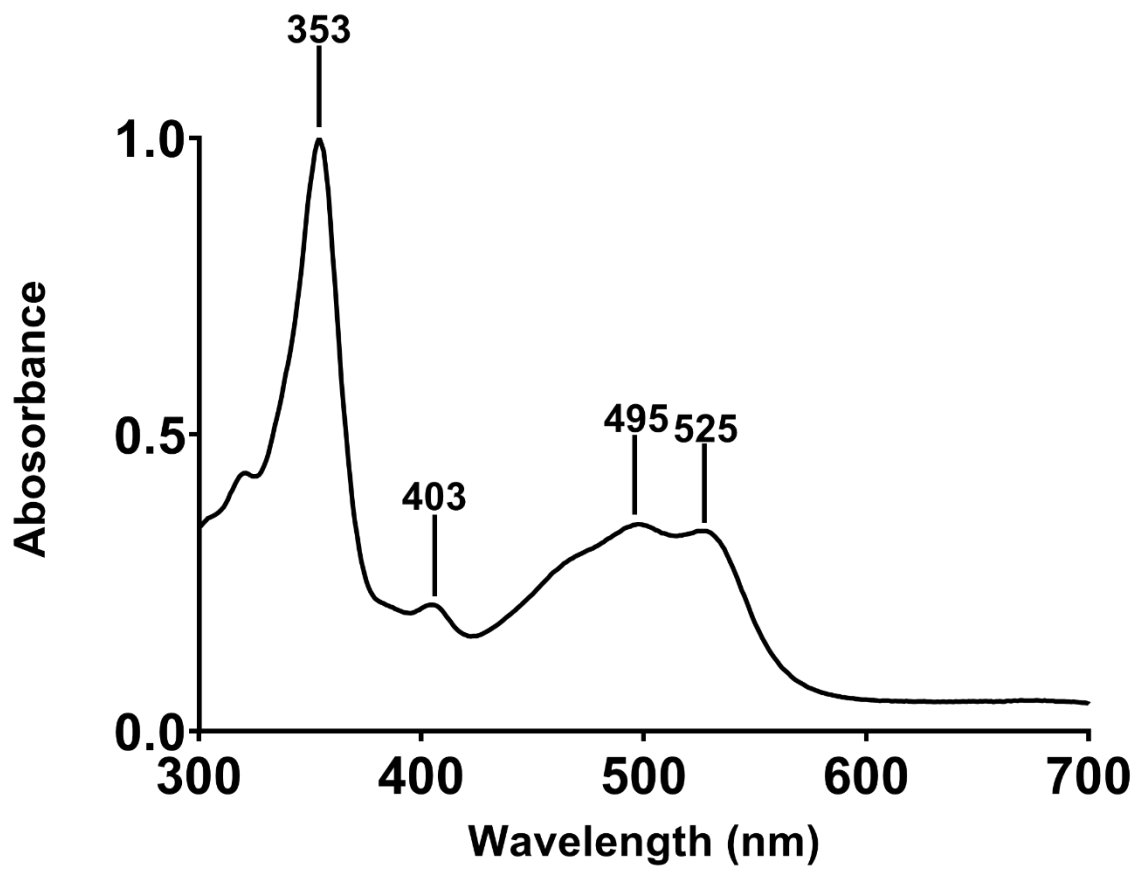

Figure S86. Electronic absorption spectra of **10** in water.

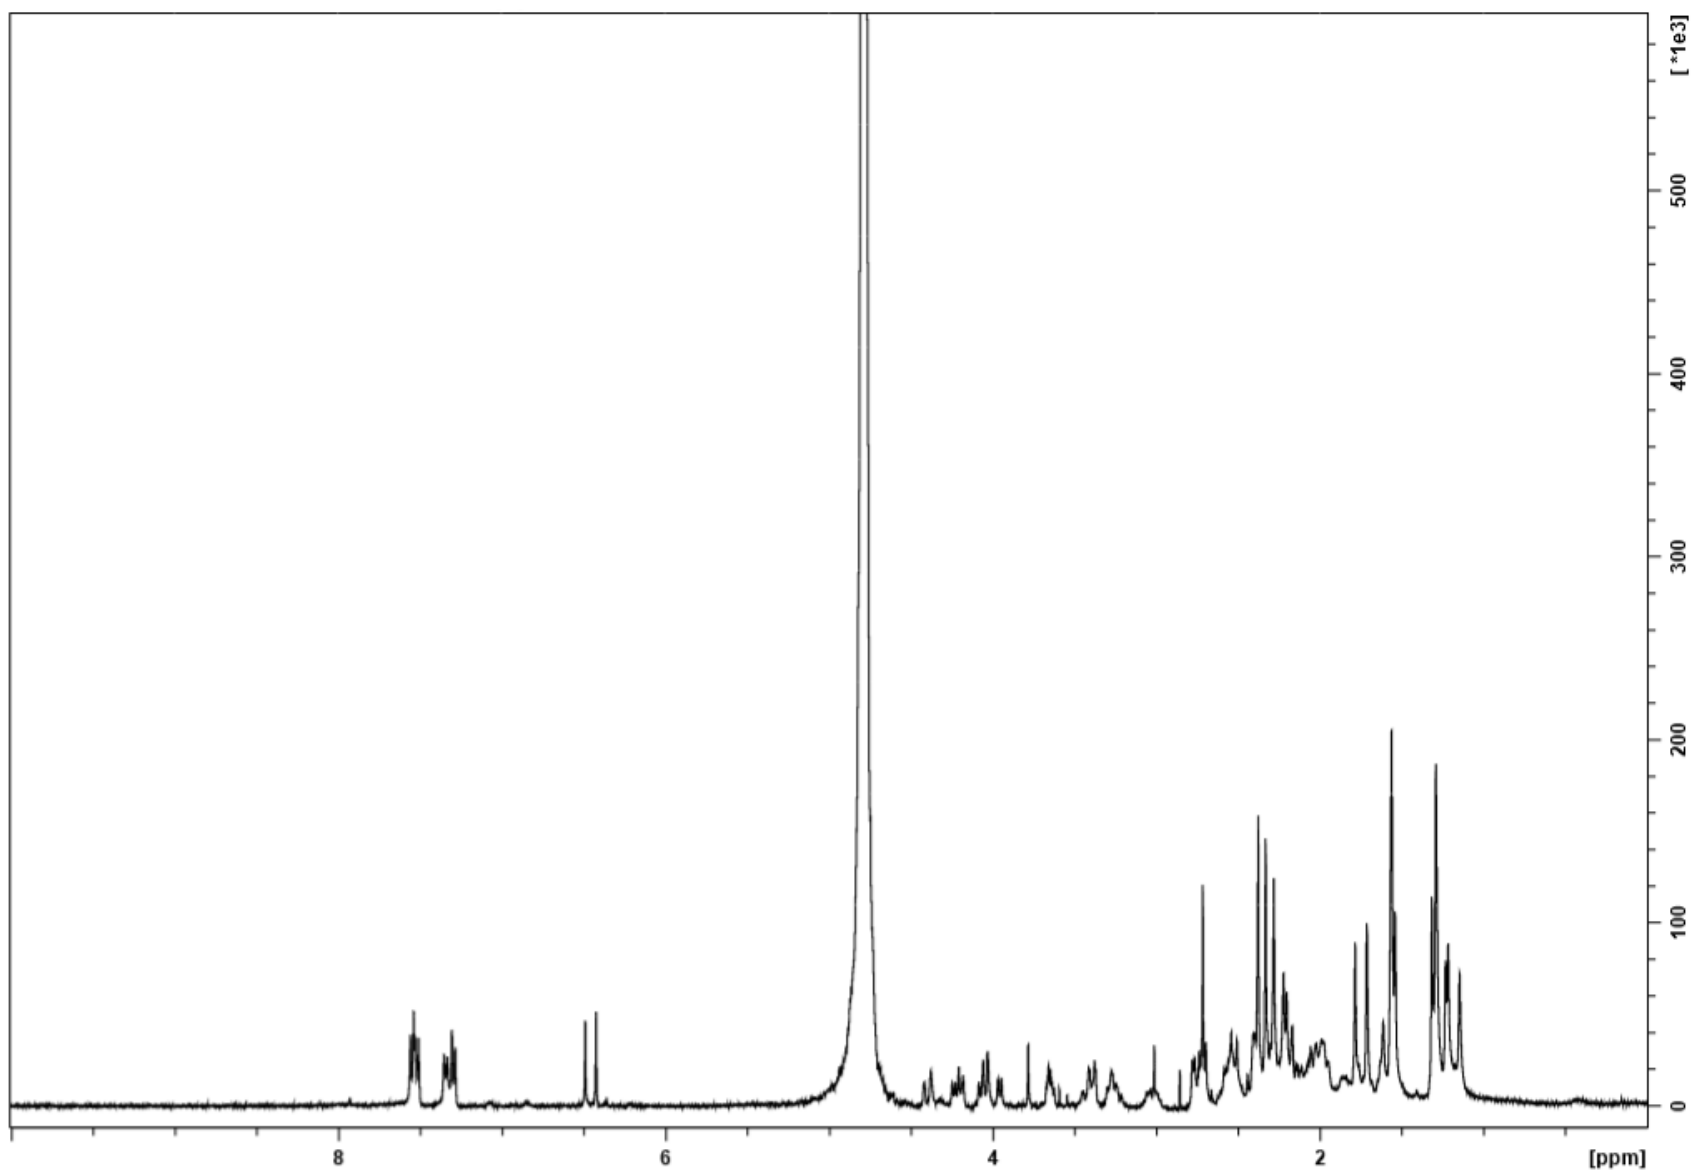

Figure S87.  $^1\text{H}$  NMR of **10** (400 MHz, 298K,  $\text{D}_2\text{O}$ ).



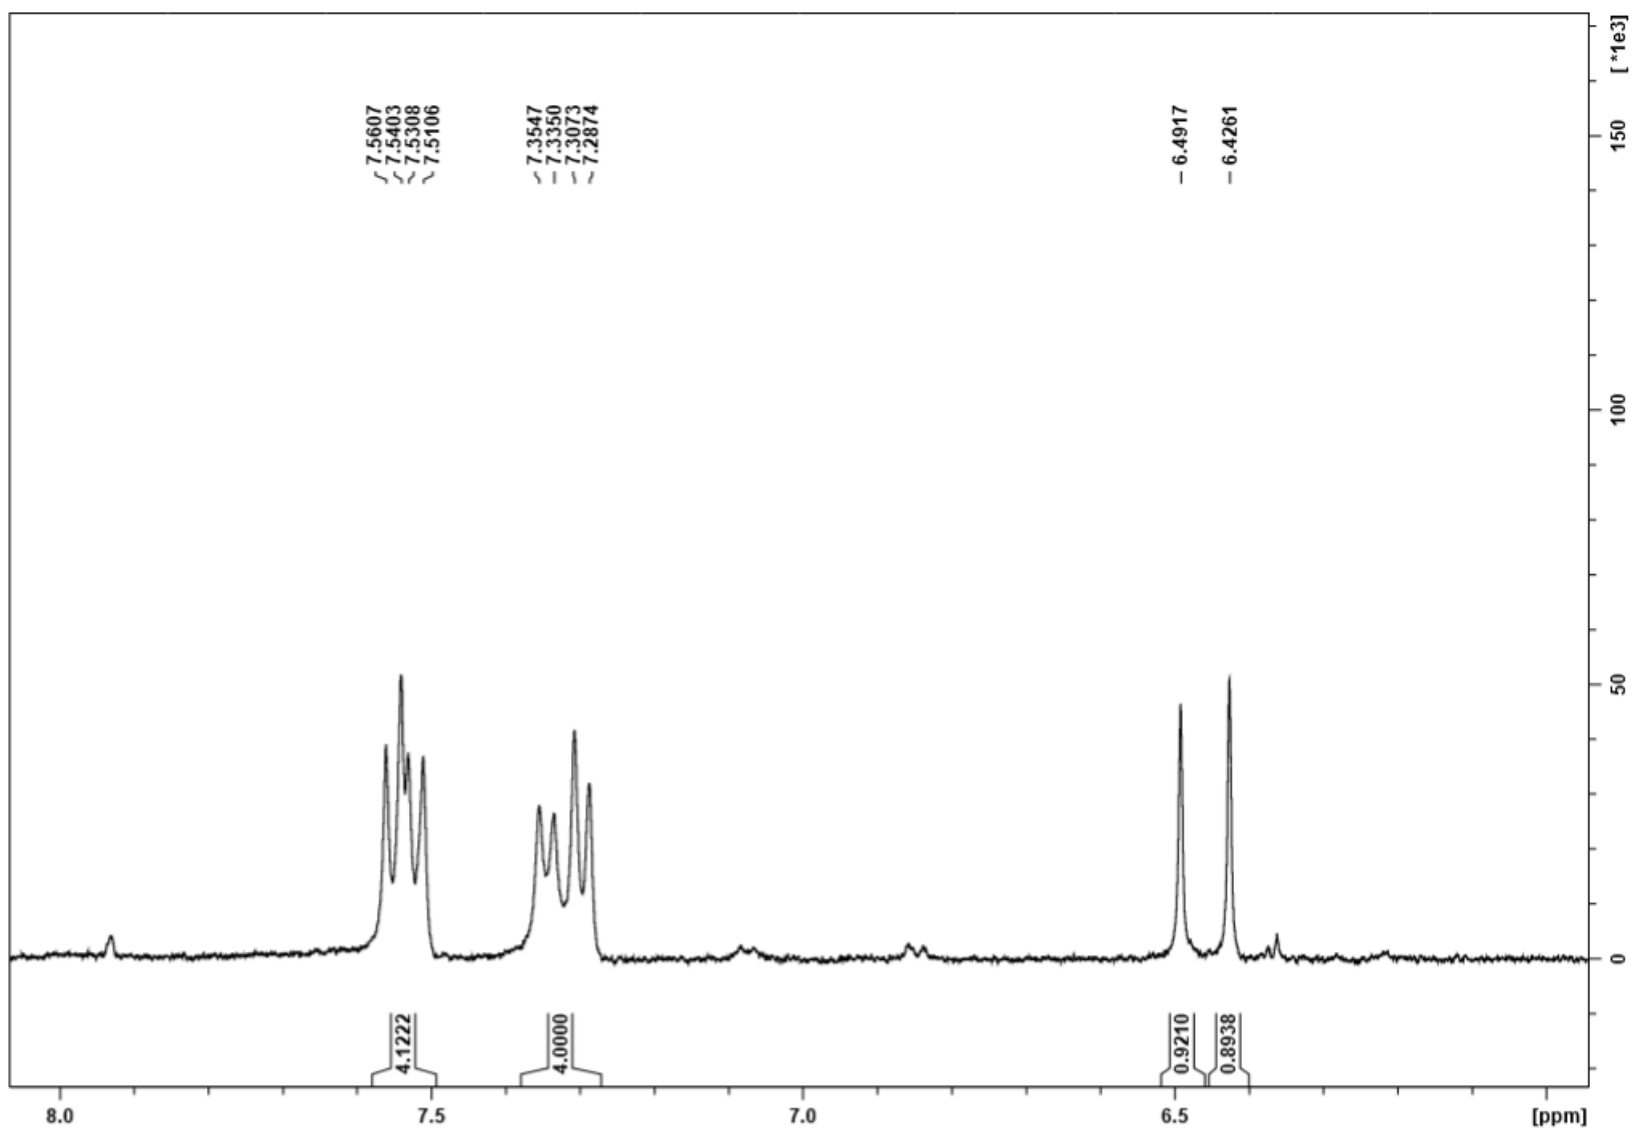

**Figure S88.**  $^1\text{H}$  NMR of **10** (400 MHz, 298K,  $\text{D}_2\text{O}$ ) (Aromatic). Characteristic Signals (H19) of  $\beta$ - (6.49) and  $\alpha$ - (6.43) aquo-isomers of **10** are Identified. Additional peak groupings between 7.56-7.51 and 7.35-7.28 are indicative of the phenyl ring linker.

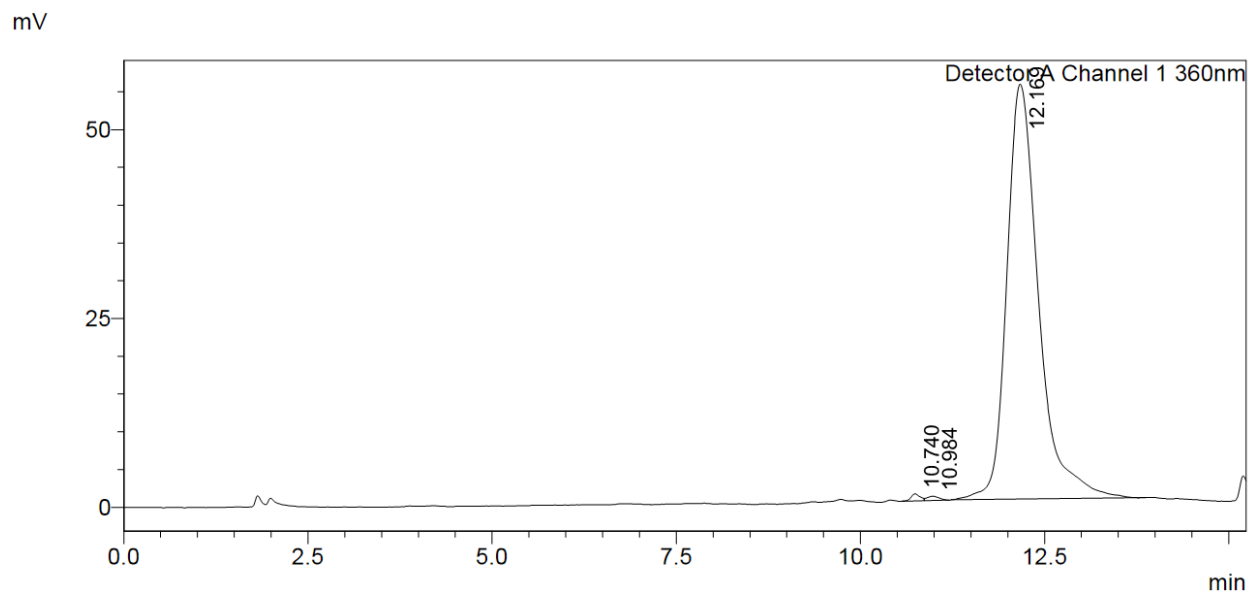

**Figure S89.** RP-HPLC trace showing product **18** at 12.2 min.

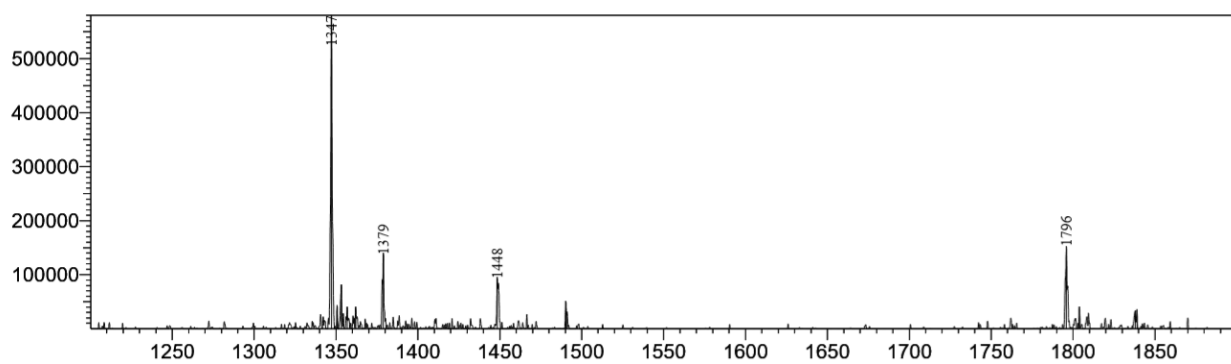

**Figure S90.** ESI-MS of **18**, expected  $m/z = 5403$ , observed  $m/z = [M^+ - H_2O + 2H^+]^3 1796$ ,  $[M^+ - H_2O + CH_3OH + 3H^+]^4 1379$ ,  $[M^+ - H_2O + 3H^+]^4 1347$   $m/z$ .

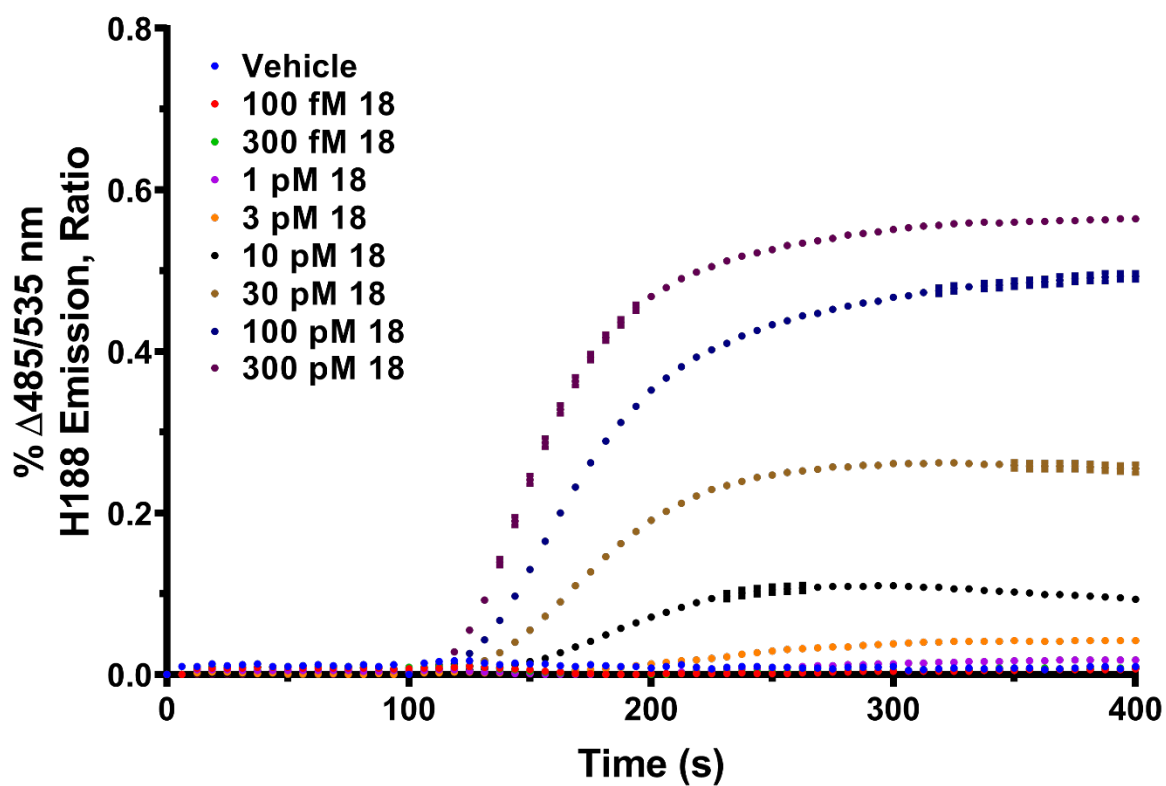

**Figure S91.** *In vitro* dose escalation study of **18** showing increase in cAMP levels in GLP-1R stably transfected HEK-293-H188 c20 cells.

mV

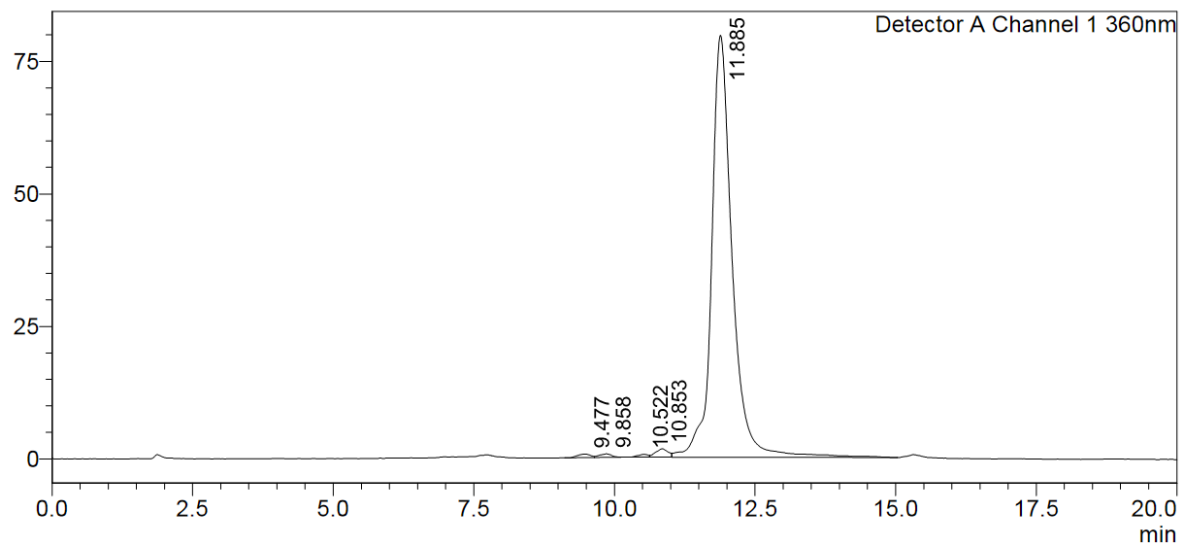

**Figure S92.** RP-HPLC trace showing product **26** at 11.9 min.

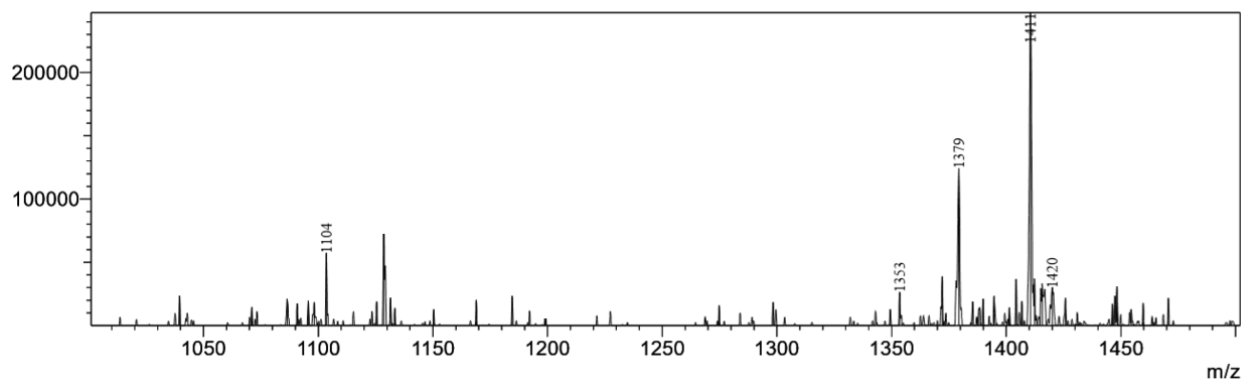

**Figure S93.** ESI-MS of **26**, expected  $m/z = 5531$ , observed  $m/z = [M^+ - H_2O + CH_3OH + 3H^+]^{+4} 1411$ ,  $[M^+ - H_2O + 3H^+]^{+4} 1379$ ,  $[M - H_2O + 4H^+ - CN]^{+4} 1353$ ,  $[M^+ - H_2O + 4H^+]^{+5} 1104$   $m/z$ .

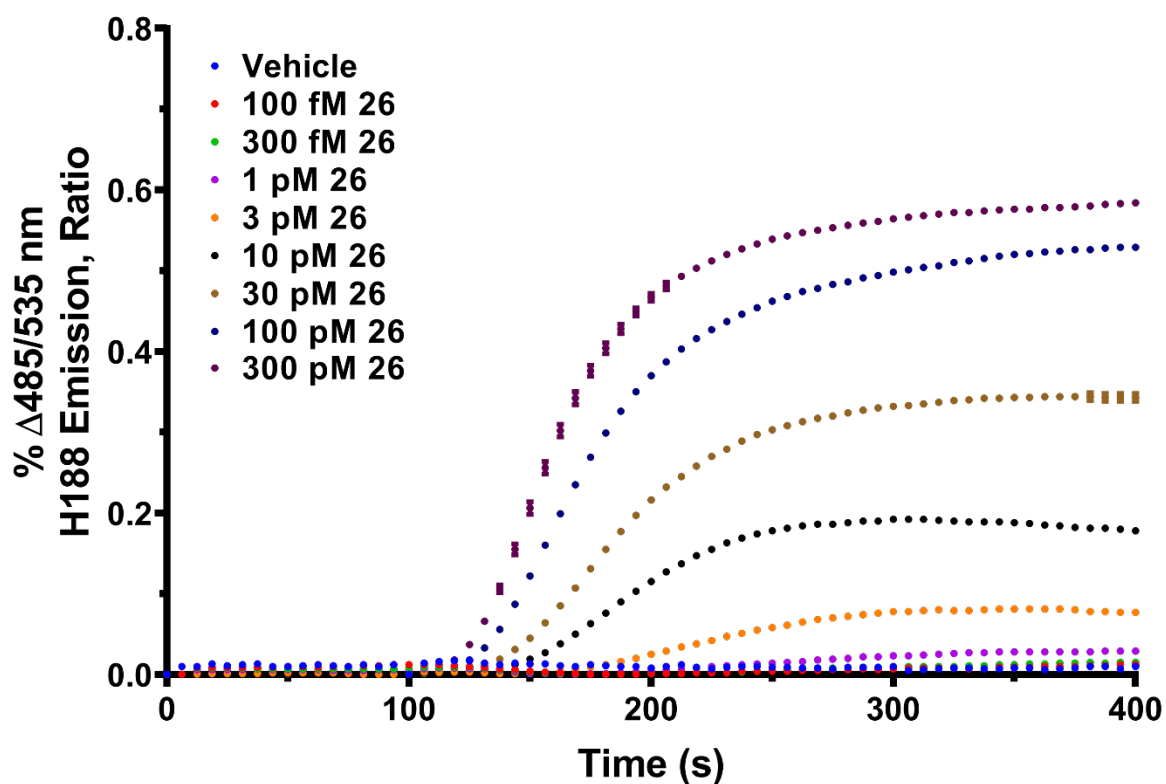

**Figure S94.** *In vitro* dose escalation study of **26** showing increase in cAMP levels in GLP-1R stably transfected HEK-293-H188 c20 cells.

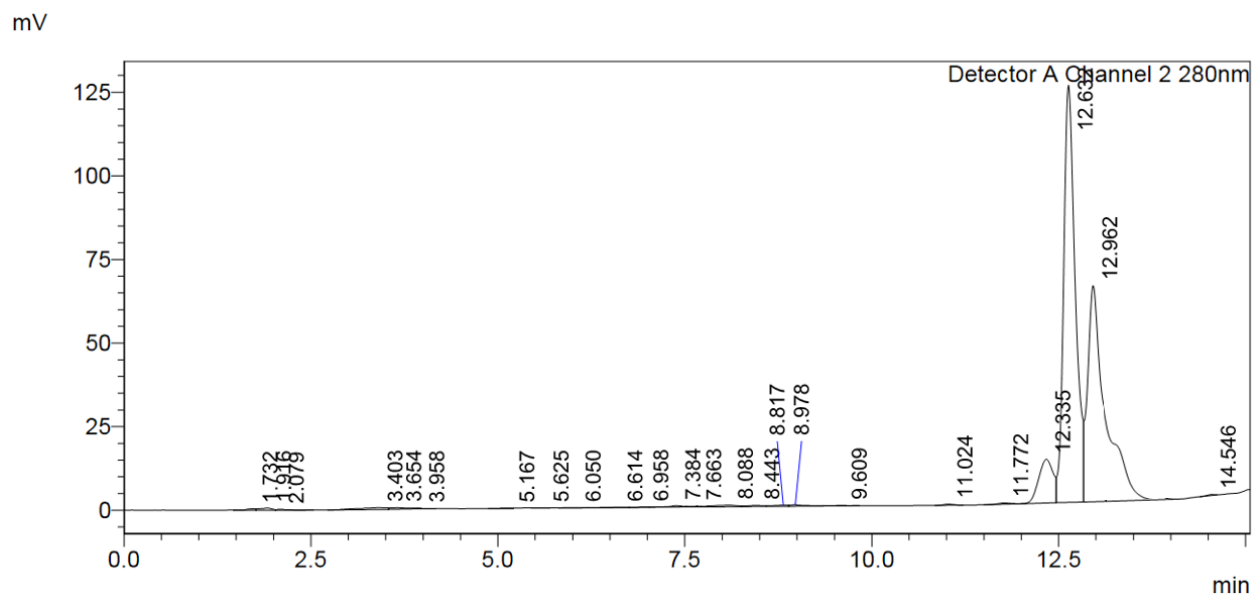

**Figure S95.** RP-HPLC trace showing the  $\alpha$ - and  $\beta$ - isomer products of **11** at 12.6 and 13.0 min.

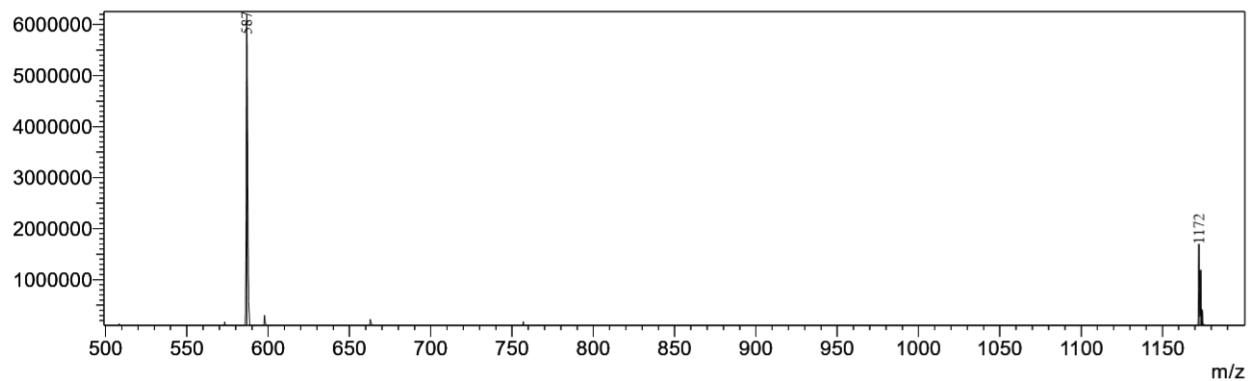

**Figure S96.** ESI-MS of **11**, expected  $m/z = 1191$ , observed  $m/z = [M^+-H_2O]^{+1} 1172$ ,  $[M^+-H_2O+H^+]^{+2} 587$   $m/z$ .

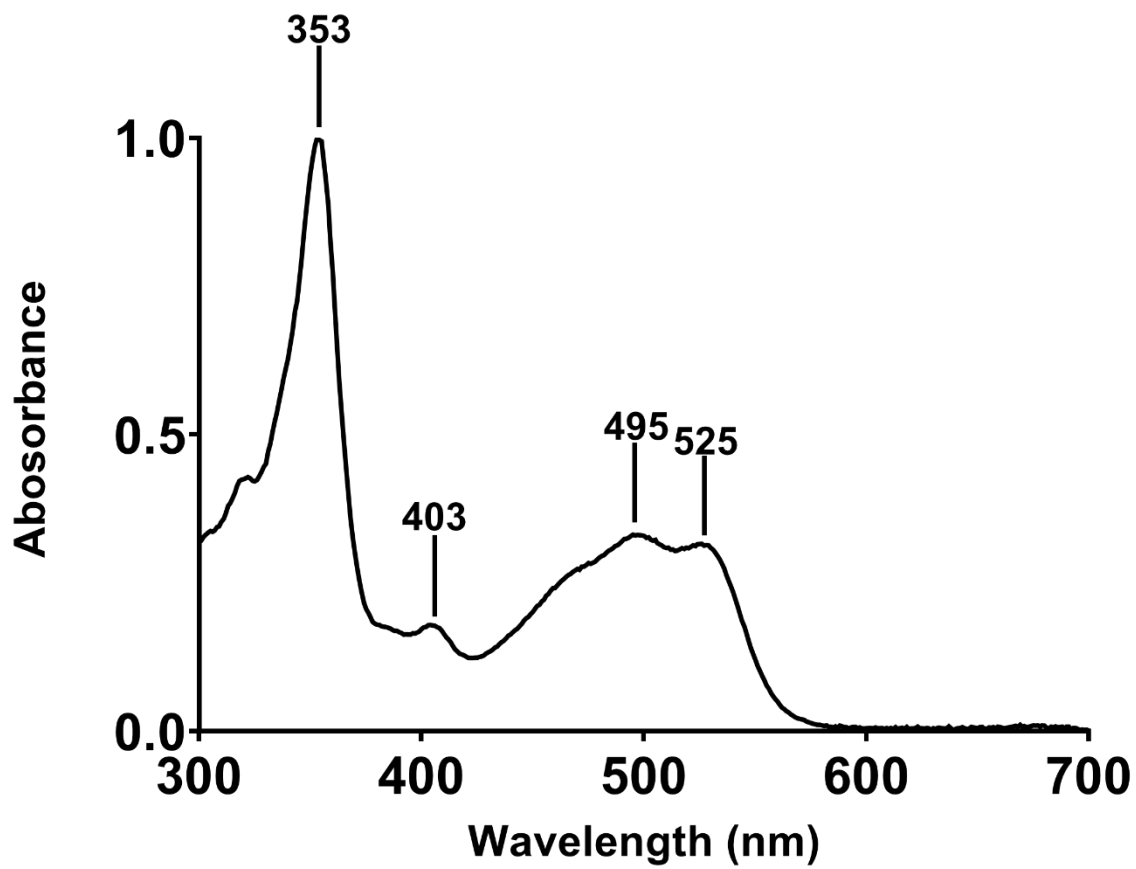

Figure S97. Electronic absorption spectra of 11 in water.

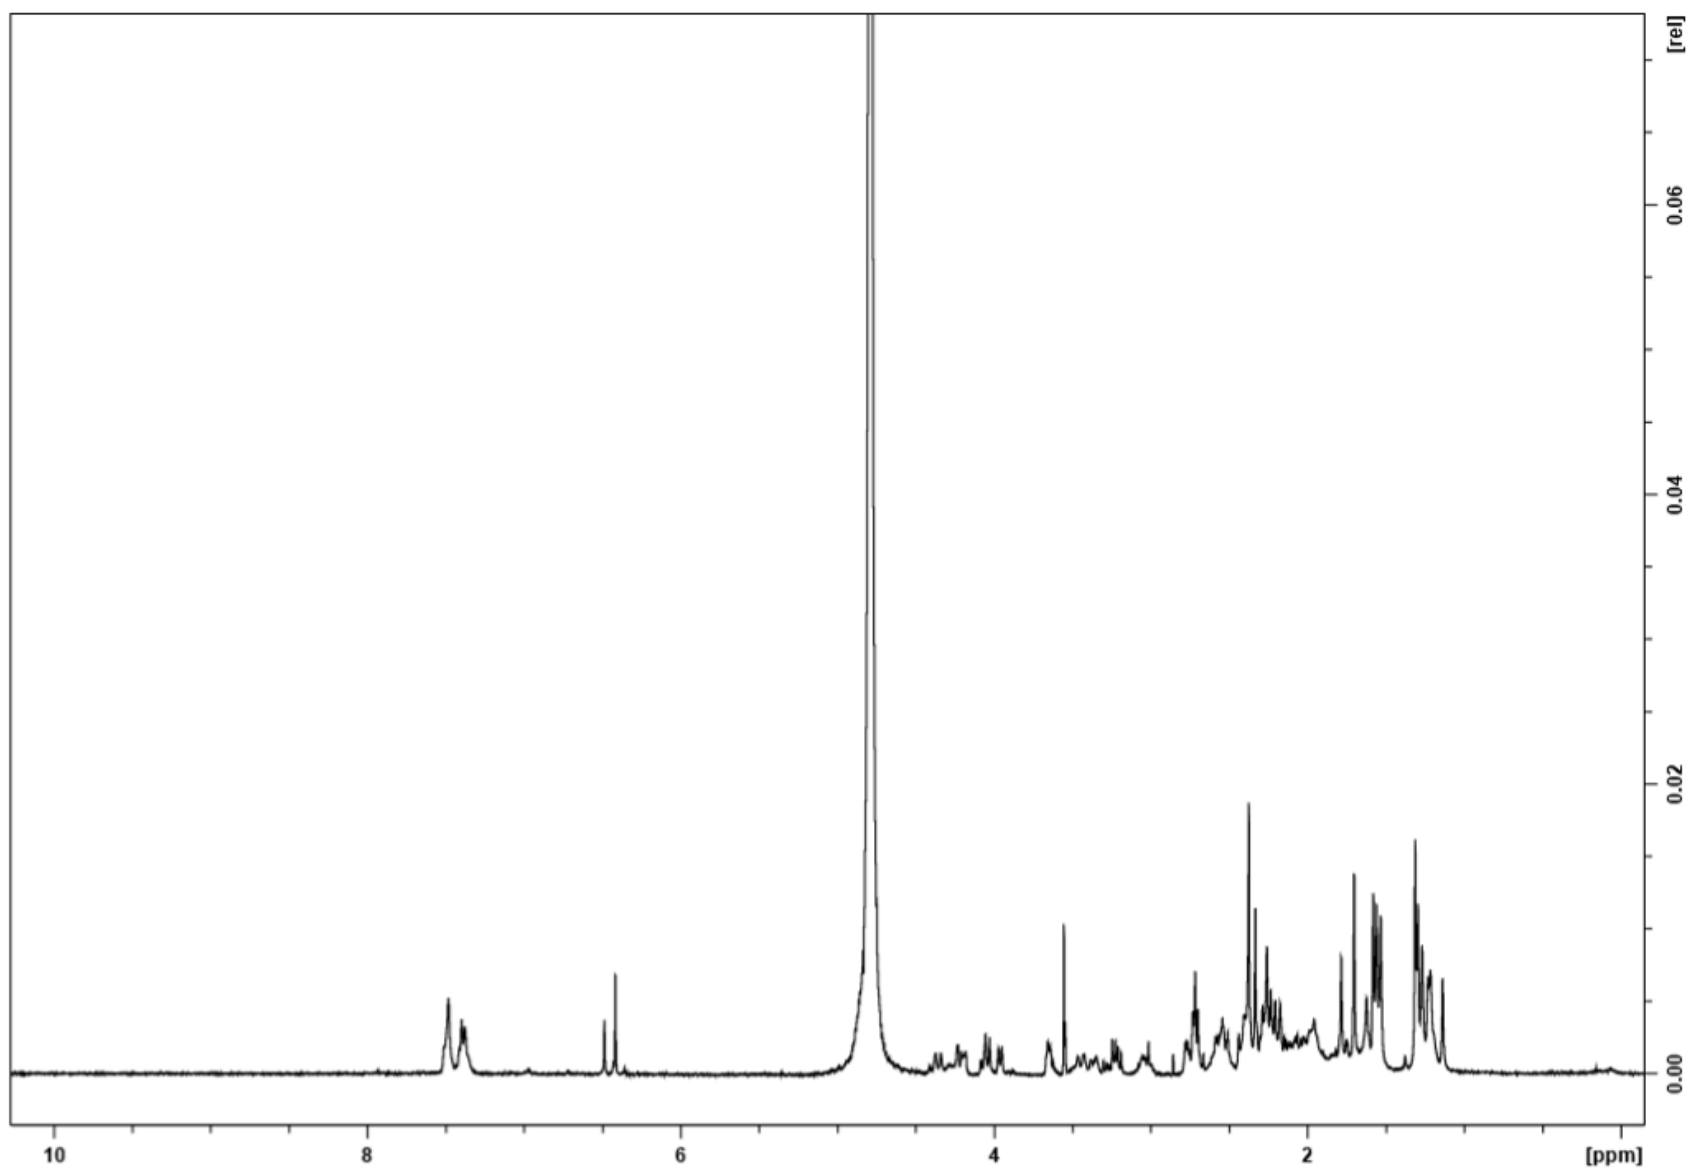

Figure S98.  $^1\text{H}$  NMR of **11**. (400 MHz, 298K,  $\text{D}_2\text{O}$ ).

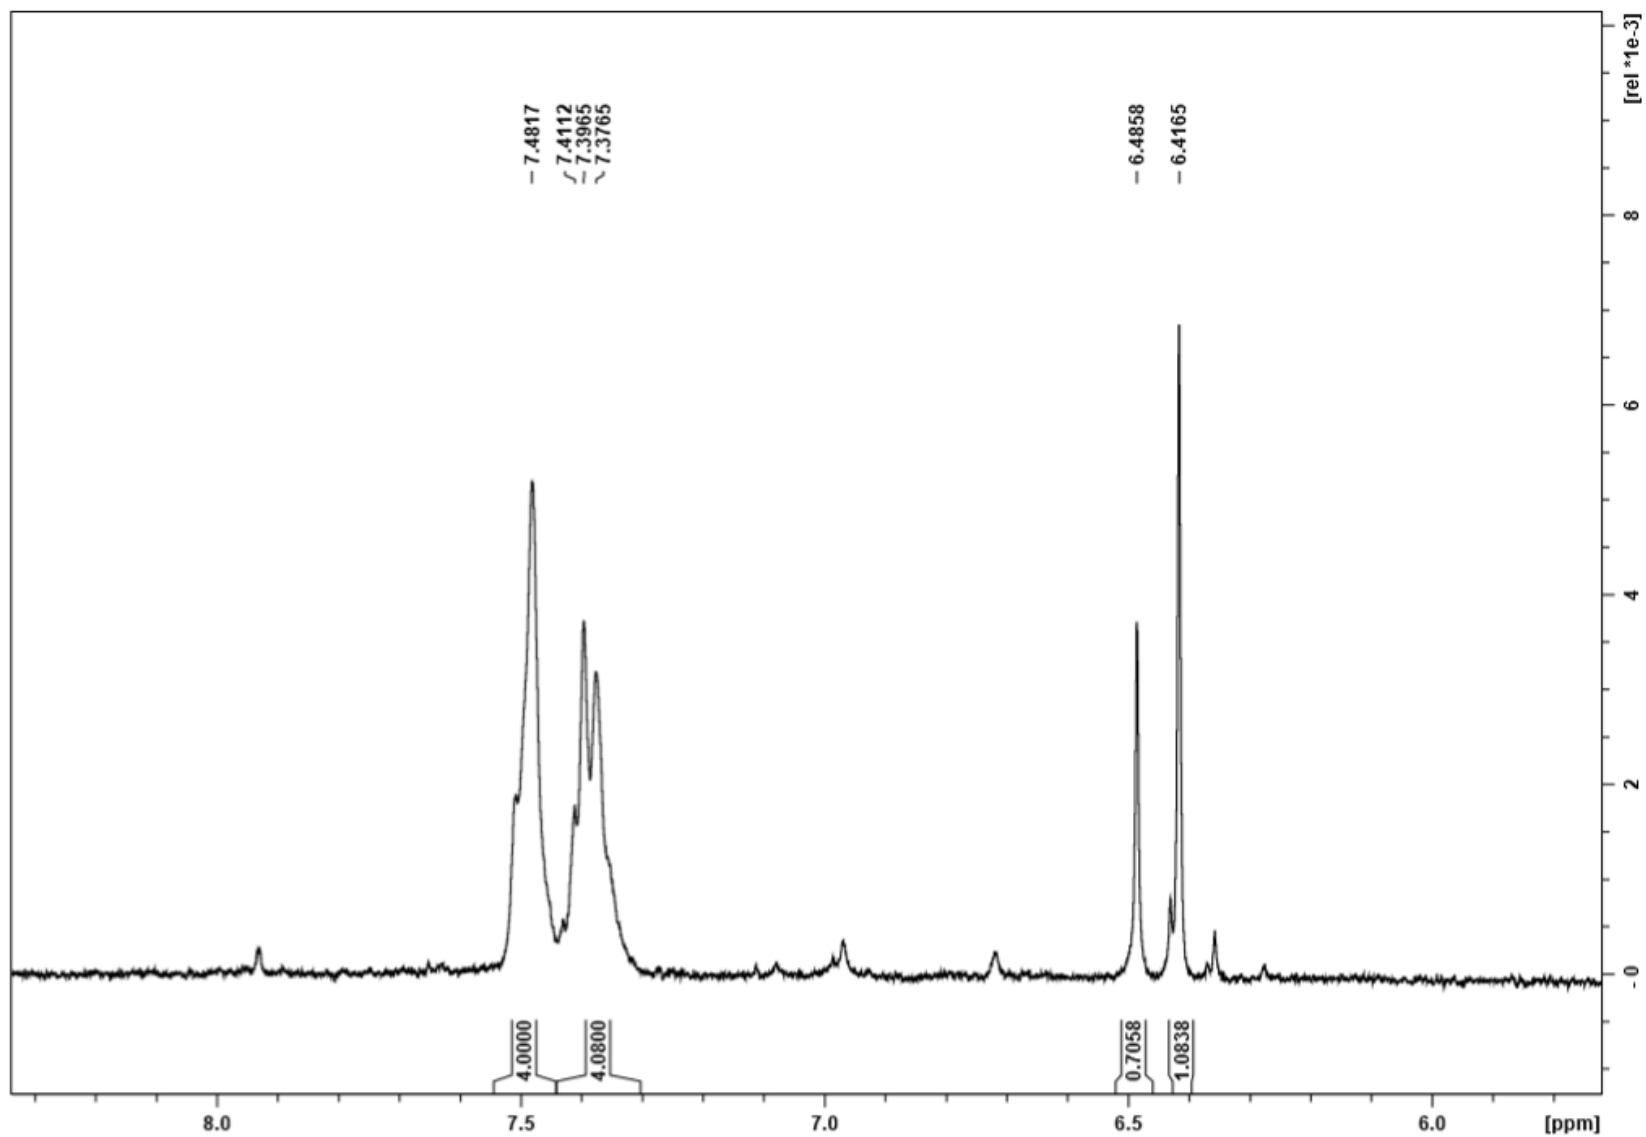

**Figure S99.**  $^1\text{H}$  NMR of **11**. (400 MHz, 298K,  $\text{D}_2\text{O}$ ) (Aromatic). Characteristic signals (H19) of  $\beta$ - (6.49) and  $\alpha$ - (6.42) aquo-isomers of **11** are observed. Additional peak groupings between 7.48-7.37 are indicative of the phenyl ring linker.



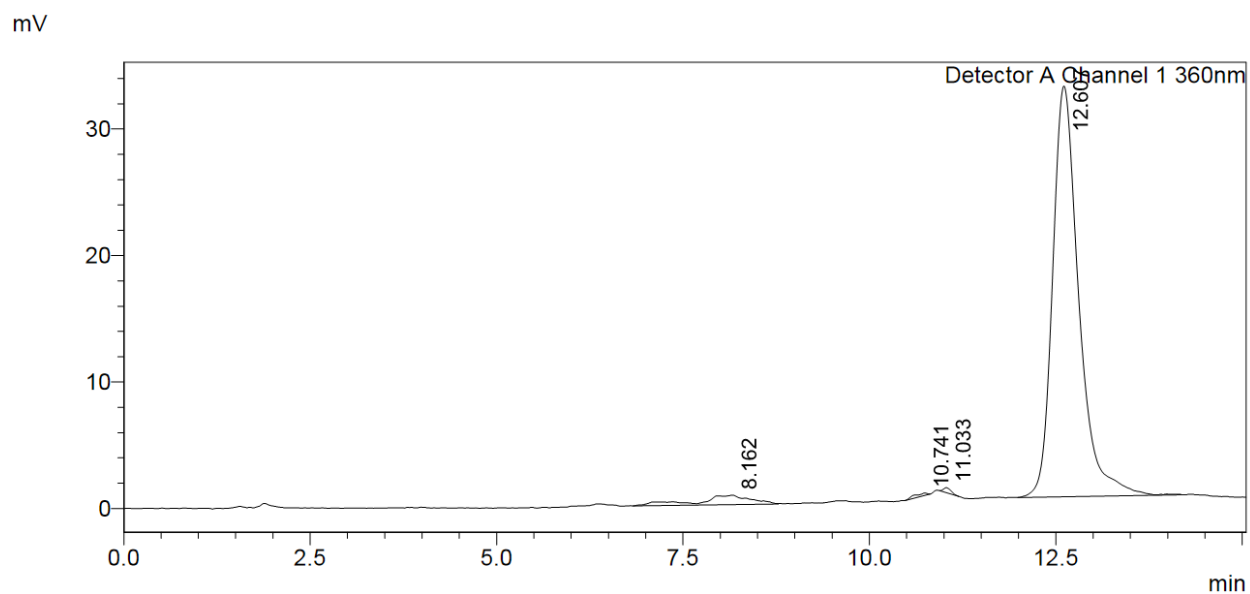

**Figure S100.** RP-HPLC trace showing product **19** at 12.6 min.

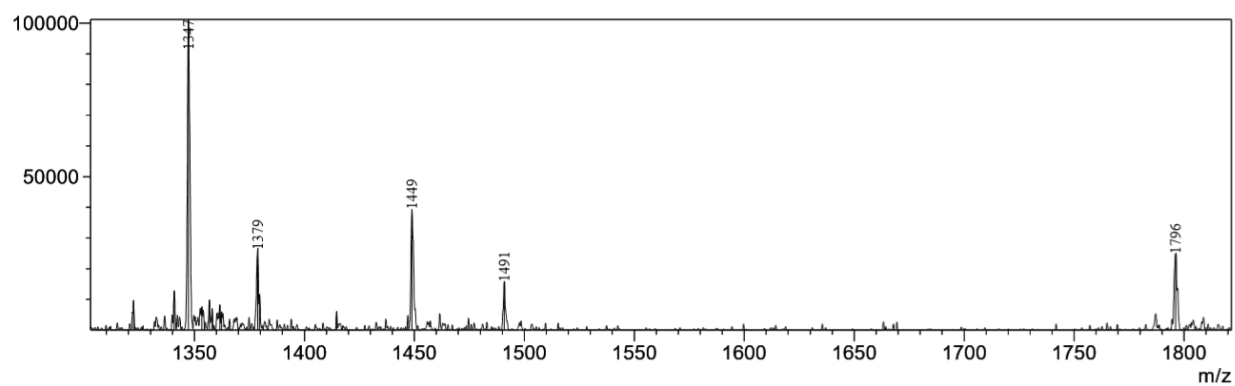

**Figure S101.** ESI-MS of **19**, expected  $m/z = 5403$ , observed  $m/z = [M^+ - H_2O + 2H^+]^3 1796$ ,  $[M^+ - H_2O + CH_3OH + 3H^+]^4 1379$ ,  $[M^+ - H_2O + 3H^+]^4 1347$   $m/z$ .

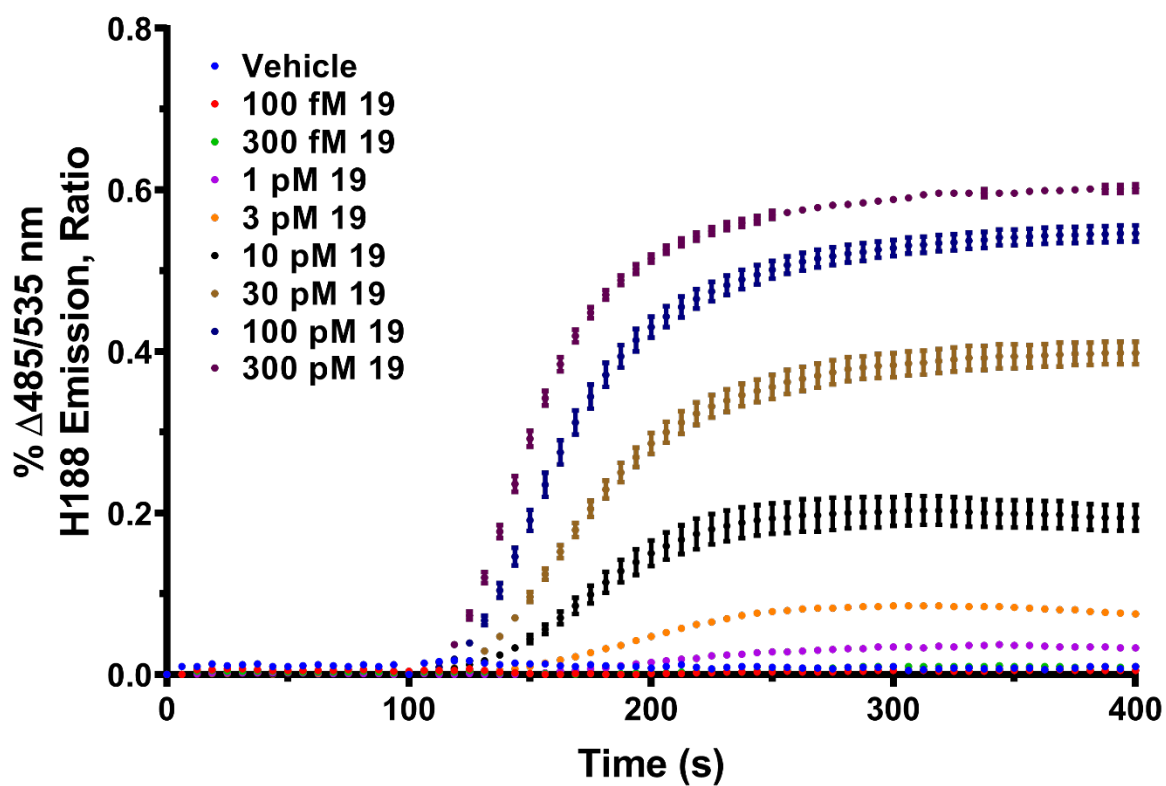

**Figure S102.** *In vitro* dose escalation study of **19** showing increase in cAMP levels in GLP-1R stably transfected HEK-293-H188 c20 cells.

mV

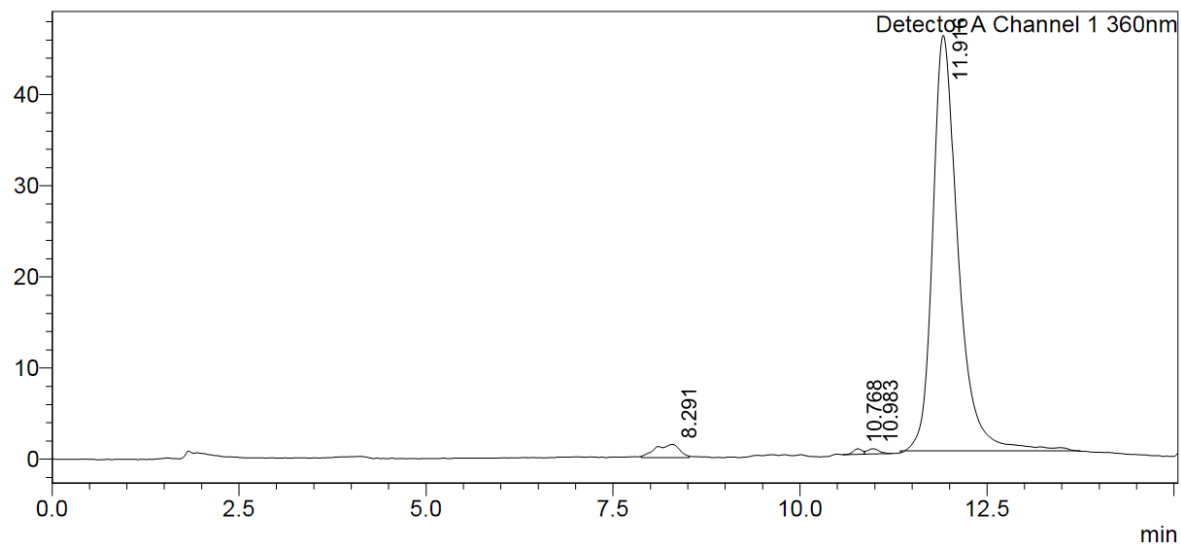

**Figure S103.** RP-HPLC trace showing product **27** at 11.9 min.

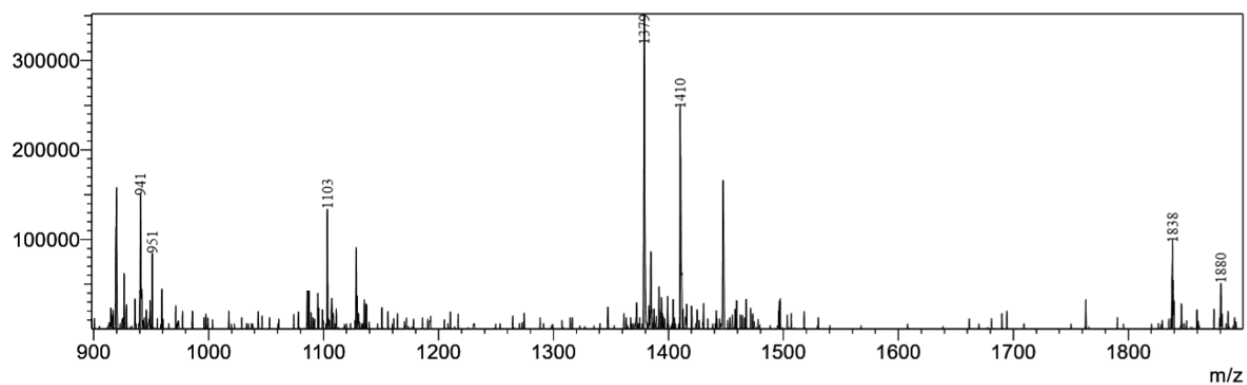

**Figure S104.** ESI-MS of **27**, expected  $m/z = 5531$ , observed  $m/z = [M^+ - H_2O + CH_3CN + 2H^+]^{+3} 1880$ ,  $[M^+ - H_2O + 2H^+]^{+3} 1838$ ,  $[M^+ - H_2O + CH_3OH + 3H^+]^{+4} 1410$ ,  $[M^+ - H_2O + 3H^+]^{+4} 1379$ ,  $[M^+ - H_2O + 4H^+]^{+5} 1103$ ,  $[M^+ - H_2O + 5H^+]^{+6} 919$   $m/z$ .

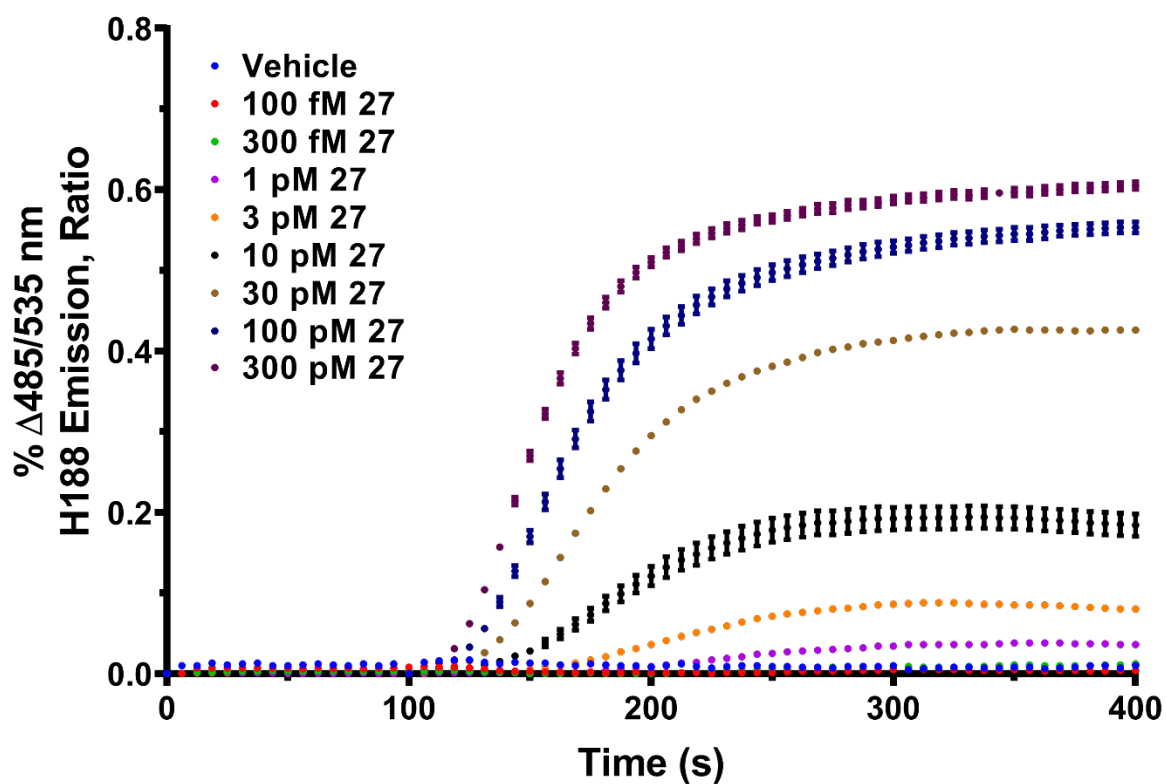

**Figure S105.** *In vitro* dose escalation study of **27** showing increase in cAMP levels in GLP-1R stably transfected HEK-293-H188 c20 cells.

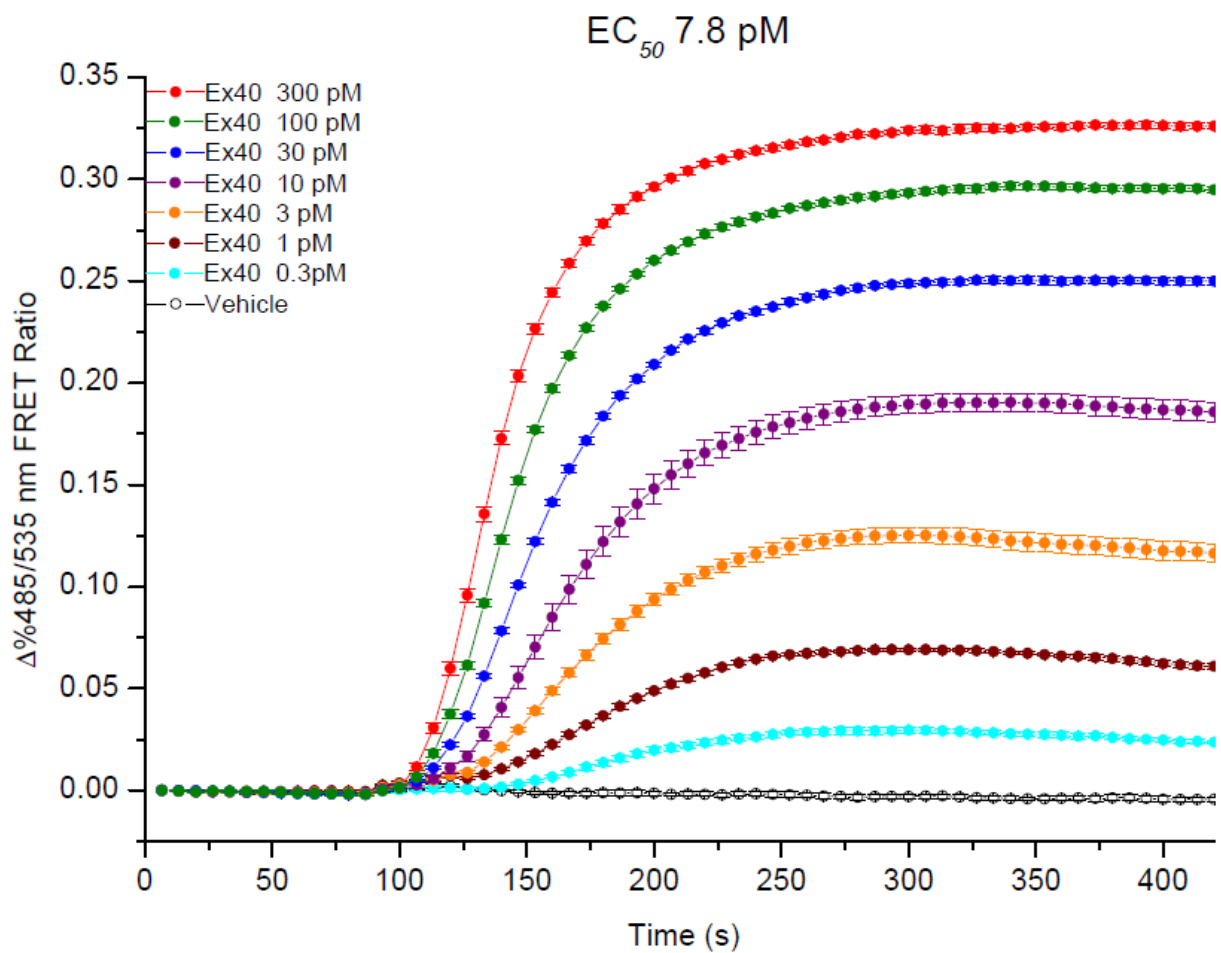

**Figure 106.** *In vitro* dose escalation study of Ex40 showing increase in cAMP levels in rGLP-1R transiently transfected HEK-293-H188 c24 cells.

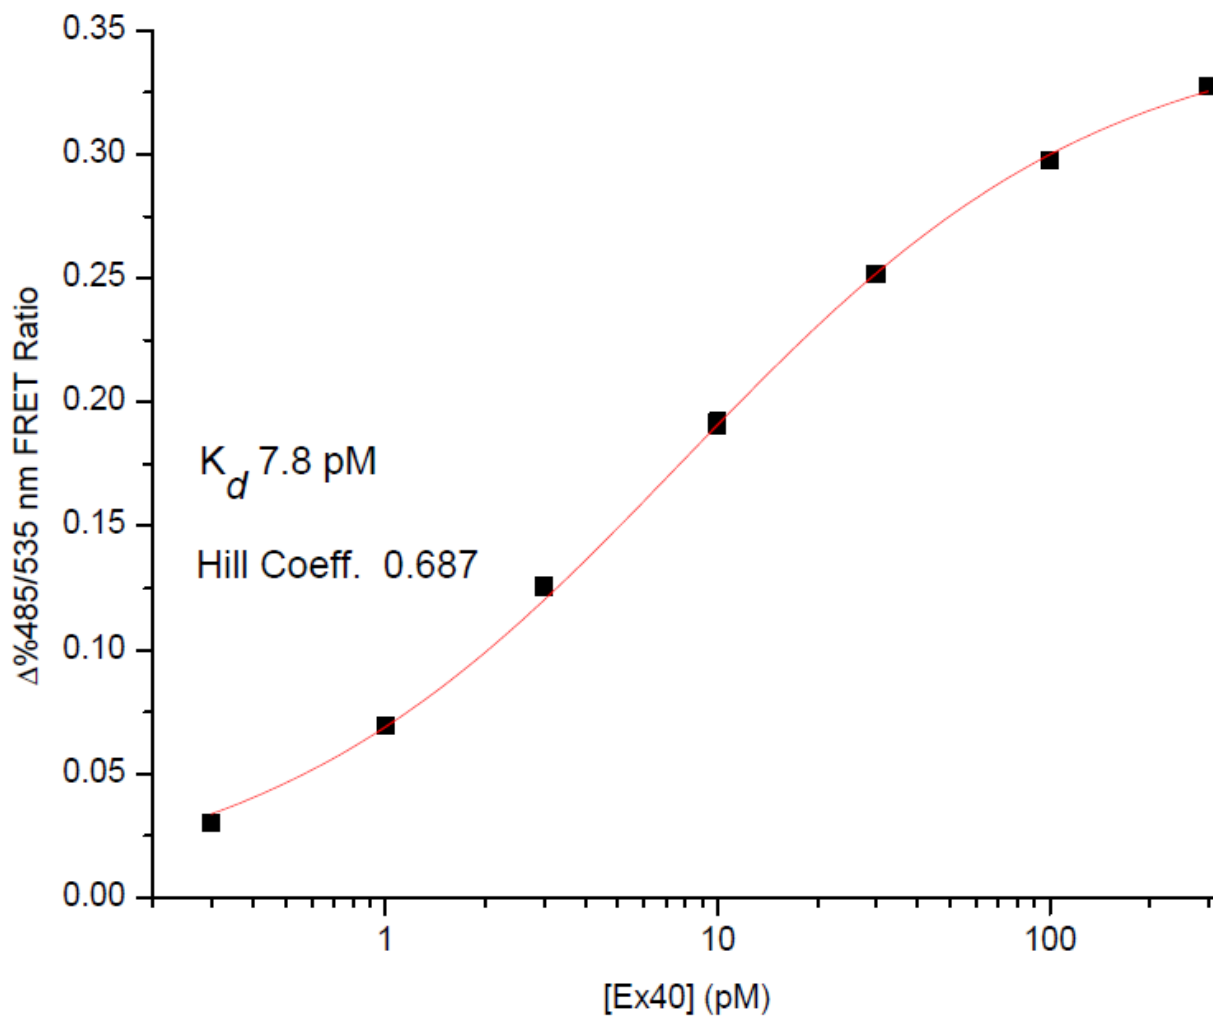

**Figure 107.** Non-linear regression dose response analysis with hill slope of Ex40.

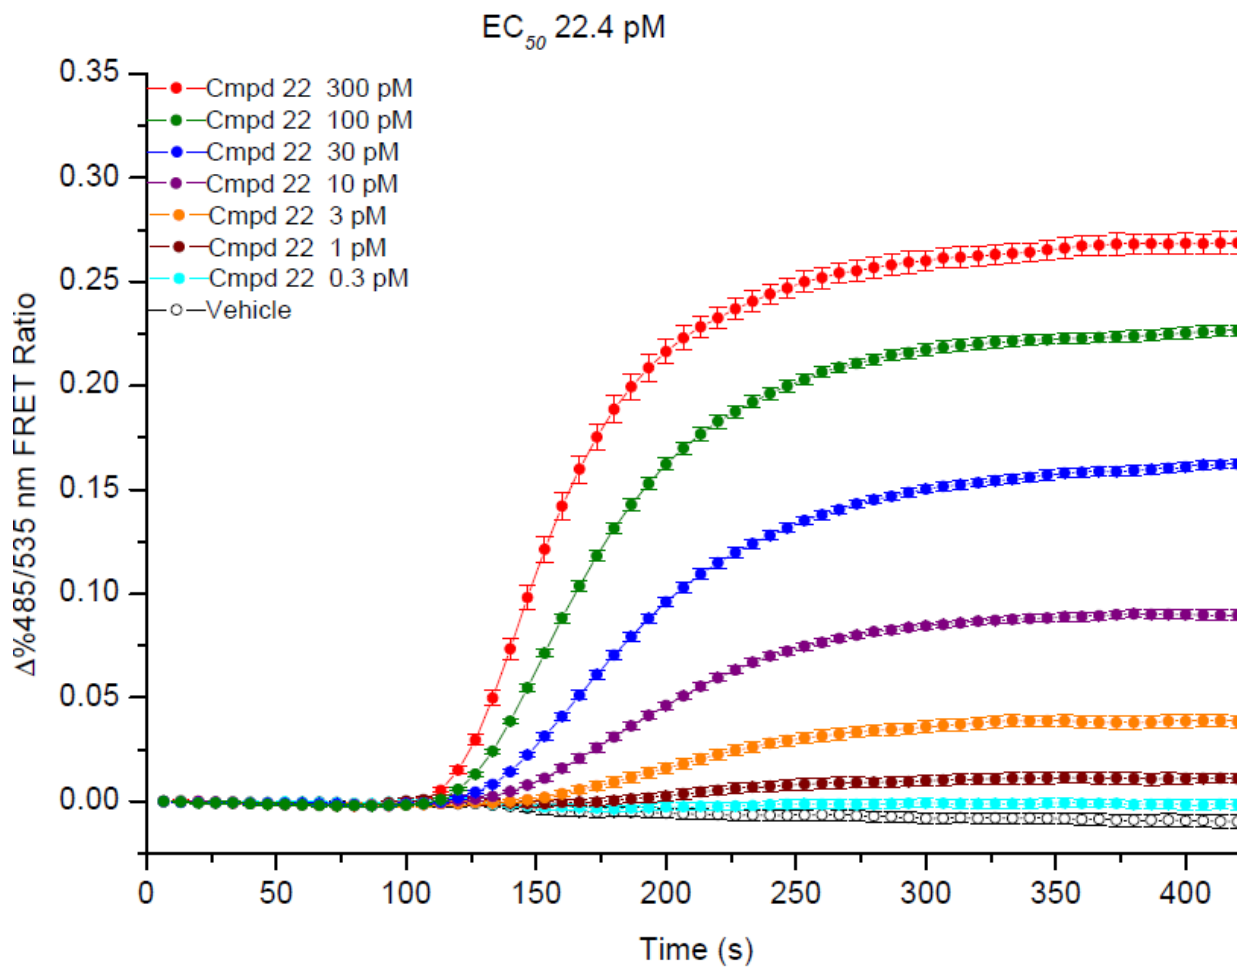

**Figure 108.** *In vitro* dose escalation study of **22** showing increase in cAMP levels in rGLP-1R transiently transfected HEK-293-H188 c24 cells.

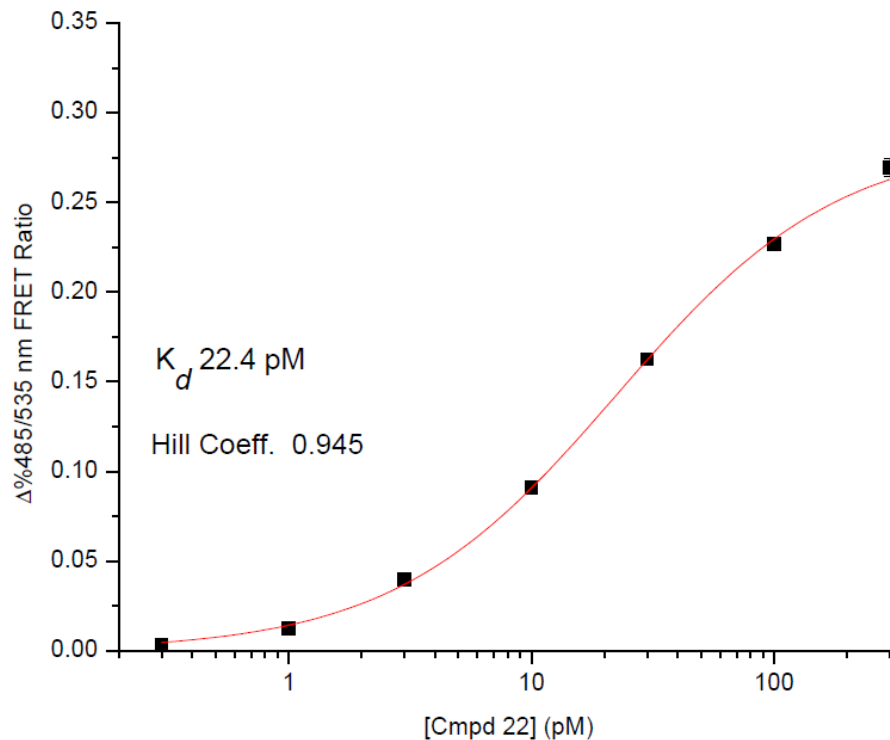

Figure 109. Non-linear regression dose response analysis with hill slope of 22.

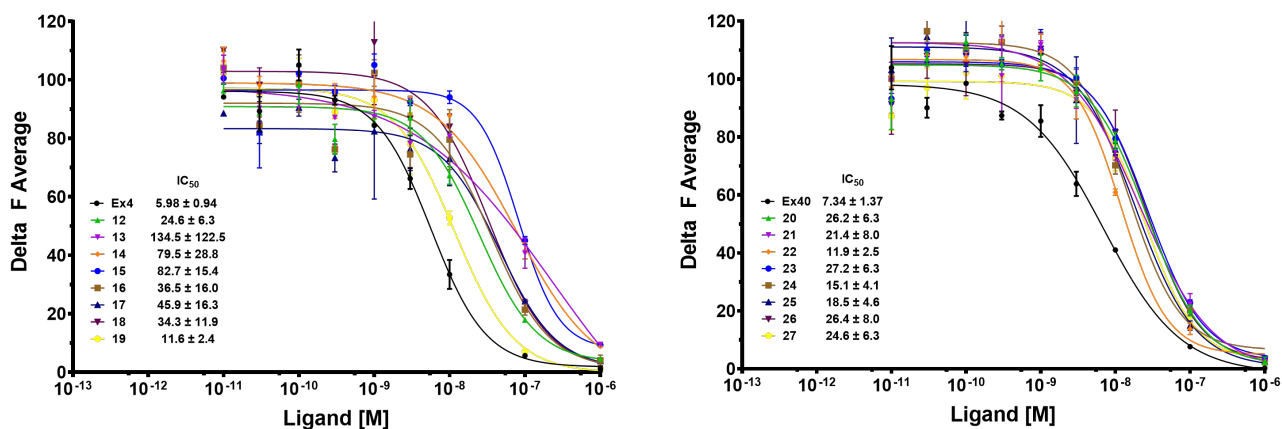

Figure S110. *In vitro* dose escalation competition binding studies of **12-27** compared with Ex4 and Ex40 controls against fluorescent GLP-1red.

1. Zhou, K.; Zelder, F. Identification of diastereomeric cyano-aqua cobinamides with a backbone-modified vitamin B12 derivative and with <sup>1</sup>H NMR spectroscopy. *Eur. J. Inorg. Chem.* **2011**, 53-57.
